# Supplementary material for: Zebrafish and Medaka as model organisms for climate change research: Global literature scientometric analysis
Source: Frontiers journal article supplement (doi:10.3389/feart.2022.988710), 2022-09-08
Supplement: Table_1.XLSX [file Table_1.XLSX]

## Sheet: medaka cc 
			citation report
overall	213		citing article
			h-index
exclude non article	178
exclude non english	177
Publication Years	Record Count	% of 177		Authors	Record Count	% of 177
2022	4	2.26		Rudolf S.S. Wu	12	6.78	Education University of Hong Kong				Countries/Regions	Record Count	% of 177
2021	13	7.345		Keng Po Lai	10	5.65	Guilin Medical University				PEOPLES R CHINA	56	31.638
2020	16	9.04		Doris Wai Ting Au	9	5.085	City University of Hong Kong				USA	37	20.904
2019	12	6.78		Ting Fung Chan	9	5.085	Chinese University of Hong Kong				JAPAN	26	14.689
2018	12	6.78		Richard Yuen Chong Kong	8	4.52	City University of Hong Kong				CANADA	12	6.78
2017	13	7.345		Jing-Woei Li	8	4.52	Chinese University of Hong Kong				FRANCE	12	6.78
2016	21	11.864		Anna Chung Kwan Tse	7	3.955	University of Hong Kong				GERMANY	10	5.65
2015	12	6.78		Pei-Jen Chen	6	3.39	National Taiwan University				NORWAY	9	5.085
2014	8	4.52		Daniel Schlenk	6	3.39	University of California Riverside				SOUTH KOREA	8	4.52
2013	9	5.085		Simon Yuan Wang	5	2.825	Boston Children's Hospital				TAIWAN	8	4.52
2012	11	6.215		Showing 10 out of 842 entries							AUSTRALIA	6	3.39
2011	9	5.085									Showing 10 out of 36 entries
2010	3	1.695
2009	4	2.26		Publication Titles	Record Count	% of 177
2008	5	2.825		AQUATIC TOXICOLOGY	23	12.994
2007	7	3.955		ENVIRONMENTAL POLLUTION	9	5.085
2006	5	2.825		SCIENCE OF THE TOTAL ENVIRONMENT	8	4.52
2005	3	1.695		CHEMOSPHERE	7	3.955
2003	3	1.695		COMPARATIVE BIOCHEMISTRY AND PHYSIOLOGY C TOXICOLOGY PHARMACOLOGY	7	3.955
2001	2	1.13		ARCHIVES OF ENVIRONMENTAL CONTAMINATION AND TOXICOLOGY	4	2.26
1999	2	1.13		ECOTOXICOLOGY AND ENVIRONMENTAL SAFETY	4	2.26
1991	1	0.565		ENVIRONMENTAL TOXICOLOGY AND CHEMISTRY	4	2.26
1985	1	0.565		GENERAL AND COMPARATIVE ENDOCRINOLOGY	4	2.26
1978	1	0.565		JOURNAL OF HAZARDOUS MATERIALS	4	2.26
				Showing 10 out of 91 entries

## Sheet: zebrafish cc
			citation report
overall	1391		citing article	25596
			h-index	82
exclude non article	1194
exclude non english	1189
Publication Years	Record Count	% of 1,189		Authors	Record Count	% of 1,189				Countries/Regions	Record Count	% of 1,189
2022	40	3.364		Steve F. Perry	34	2.86	University of Ottawa			USA	342	28.764
2021	140	11.775		Michael G. Jonz	16	1.346	University of Ottawa			PEOPLES R CHINA	261	21.951
2020	135	11.354		Bernd Pelster	15	1.262	University of Innsbruck			CANADA	146	12.279
2019	114	9.588		Yuan Li	13	1.093	China Agricultural University			ENGLAND	80	6.728
2018	97	8.158		Warren W. Burggren	12	1.009	University of North Texas Denton			GERMANY	75	6.308
2017	107	8.999		Cunming Duan	12	1.009	University of Michigan			AUSTRALIA	59	4.962
2016	91	7.653		Rudolf S.S. Wu	12	1.009	Education University of Hong Kong			FRANCE	52	4.373
2015	76	6.392		Michael Lardelli	11	0.925	University of Adelaide			ITALY	49	4.121
2014	67	5.635		Thorsten Schwerte	11	0.925	University of Innsbruck			BRAZIL	44	3.701
2013	67	5.635		Yihai Cao	10	0.841	Karolinska Institutet			TAIWAN	40	3.364
2012	35	2.944		Showing 10 out of 6,014 entries						Showing 10 out of 74 entries
2011	48	4.037								2 record(s) (0.168%) do not contain data in the field being analyzed
2010	42	3.532
2009	31	2.607		Publication Titles	Record Count	% of 1,189
2008	28	2.355		JOURNAL OF EXPERIMENTAL BIOLOGY	42	3.532
2007	12	1.009		AQUATIC TOXICOLOGY	37	3.112
2006	16	1.346		PLOS ONE	35	2.944
2005	11	0.925		SCIENTIFIC REPORTS	31	2.607
2004	7	0.589		CHEMOSPHERE	26	2.187
2003	6	0.505		SCIENCE OF THE TOTAL ENVIRONMENT	25	2.103
2002	4	0.336		ENVIRONMENTAL POLLUTION	21	1.766
2001	5	0.421		COMPARATIVE BIOCHEMISTRY AND PHYSIOLOGY A MOLECULAR INTEGRATIVE PHYSIOLOGY	19	1.598
2000	3	0.252		AMERICAN JOURNAL OF PHYSIOLOGY REGULATORY INTEGRATIVE AND COMPARATIVE PHYSIOLOGY	18	1.514
1999	5	0.421		COMPARATIVE BIOCHEMISTRY AND PHYSIOLOGY C TOXICOLOGY PHARMACOLOGY	17	1.43
1995	1	0.084		Showing 10 out of 436 entries
1994	1	0.084
Sum of the Times Cited	32594
Average Citations per Item	27.41
h-index	82
Title	Authors	Source Title	Publication Year	Total Citations	Average per Year
Toxicity of silver nanoparticles in zebrafish models	Asharani, P. V.; Wu, Yi Lian; Gong, Zhiyuan; Valiyaveettil, Suresh	NANOTECHNOLOGY	2008	681	45.4
The Oxygen-Rich Postnatal Environment Induces Cardiomyocyte Cell-Cycle Arrest through DNA Damage Response	Puente, Bao N.; Kimura, Wataru; Muralidhar, Shalini A.; Moon, Jesung; Amatruda, James F.; Phelps, Kate L.; Grinsfelder, David; Rothermel, Beverly A.; Chen, Rui; Garcia, Joseph A.; Santos, Celio X.; Thet, SuWannee; Mori, Eiichiro; Kinter, Michael T.; Rindler, Paul M.; Zacchigna, Serena; Mukherjee, Shibani; Chen, David J.; Mahmoud, Ahmed I.; Giacca, Mauro; Rabinovitch, Peter S.; Aroumougame, Asaith…	CELL	2014	437	48.56
The Serine Protease Matriptase-2 (TMPRSS6) Inhibits Hepcidin Activation by Cleaving Membrane Hemojuvelin	Silvestri, Laura; Pagani, Alessia; Nai, Antonella; De Domenico, Ivana; Kaplan, Jerry; Camaschella, Clara	CELL METABOLISM	2008	405	27
Live imaging of neuronal degradation by microglia reveals a role for v0-ATPase a1 in phagosomal fusion in vivo	Peri, Francesca; Nuesslein-Volhard, Christiane	CELL	2008	380	25.33
Hypoxia induces heart regeneration in adult mice	Nakada, Yuji; Canseco, Diana C.; Thet, SuWannee; Abdisalaam, Salim; Asaithamby, Aroumougame; Santos, Celio X.; Shah, Ajay M.; Zhang, Hua; Faber, James E.; Kinter, Michael T.; Szweda, Luke I.; Xing, Chao; Hu, Zeping; Deberardinis, Ralph J. .; Schiattarella, Gabriele; Hill, Joseph A.; Oz, Orhan; Lu, Zhigang; Zhang, Cheng Cheng; Kimura, Wataru; Sadek, Hesham A.	NATURE	2017	347	57.83
Comparison of the toxicity of silver, gold and platinum nanoparticles in developing zebrafish embryos	Asharani, P. V.; Yi Lianwu; Gong, Zhiyuan; Valiyaveettil, Suresh	NANOTOXICOLOGY	2011	315	26.25
The composition of the zebrafish intestinal microbial community varies across development	Stephens, W. Zac; Burns, Adam R.; Stagaman, Keaton; Wong, Sandi; Rawls, John F.; Guillemin, Karen; Bohannan, Brendan J. M.	ISME JOURNAL	2016	290	41.43
Assessing the toxicity of Pb- and Sn-based perovskite solar cells in model organism Danio rerio	Babayigit, Aslihan; Thanh, Dinh Duy; Ethirajan, Anitha; Manca, Jean; Muller, Marc; Boyen, Hans-Gerd; Conings, Bert	SCIENTIFIC REPORTS	2016	275	39.29
Acute toxicities of six manufactured nanomaterial suspensions to Daphnia magna	Zhu, Xiaoshan; Zhu, Lin; Chen, Yongsheng; Tian, Shengyan	JOURNAL OF NANOPARTICLE RESEARCH	2009	263	18.79
A horizon scan of global conservation issues for 2010	Sutherland, William J.; Clout, Mick; Cote, Isabelle M.; Daszak, Peter; Depledge, Michael H.; Fellman, Liz; Fleishman, Erica; Garthwaite, Rachel; Gibbons, David W.; De Lurio, Jennifer; Impey, Andrew J.; Lickorish, Fiona; Lindenmayer, David; Madgwick, Jane; Margerison, Ceri; Maynard, Trevor; Peck, Lloyd S.; Pretty, Jules; Prior, Stephanie; Redford, Kent H.; Scharlemann, Joern P. W.; Spalding, Mark;…	TRENDS IN ECOLOGY & EVOLUTION	2010	249	19.15
Ultrasensitive Nanosensors Based on Upconversion Nanoparticles for Selective Hypoxia Imaging in Vivo upon Near-Infrared Excitation	Liu, Jianan; Liu, Yong; Bu, Wenbo; Bu, Jiwen; Sun, Yong; Du, Jiulin; Shi, Jianlin	JOURNAL OF THE AMERICAN CHEMICAL SOCIETY	2014	243	27
Hypoxia as a therapy for mitochondrial disease	Jain, Isha H.; Zazzeron, Luca; Goli, Rahul; Alexa, Kristen; Schatzman-Bone, Stephanie; Dhillon, Harveen; Goldberger, Olga; Peng, Jun; Shalem, Ophir; Sanjana, Neville E.; Zhang, Feng; Goessling, Wolfram; Zapol, Warren M.; Mootha, Vamsi K.	SCIENCE	2016	234	33.43
Delta4, an endothelial specific Notch ligand expressed at sites of physiological and tumor angiogenesis	Mailhos, C; Modlich, U; Lewis, J; Harris, A; Bicknell, R; Ish-Horowicz, D	DIFFERENTIATION	2001	232	10.55

## Sheet: zebrafish narrative
AUTOMATICALLY GENERATED NARRATIVES
Time of creation: Mon Jun 06 20:18:41 MYT 2022
MAJOR CLUSTERS
The network is divided into 17 co-citation clusters. The largest 17 clusters are summarized as follows.
Table 1. Summary of the largest 17 clusters.
ClusterID	Size	Silhouette	Label (LSI)	Label (LLR)	Label (MI)	Average Year
0	95	0.924	glucose metabolism	hypoxia-inducible transcription factor (51.39, 1.0E-4)	inducible factor (2.62)	2014
1	81	0.927	respiratory developmental plasticity	respiratory developmental plasticity (73.13, 1.0E-4)	chuvash polycythemia (0.76)	2009
2	56	0.978	gene expression profiling	gene expression profiling (89.39, 1.0E-4)	dynamic model (0.09)	2004
3	55	0.996	invasive lionfish	invasive lionfish (64, 1.0E-4)	range expansion (0.11)	2015
5	46	0.979	signalling pathway	respiratory gases (68.81, 1.0E-4)	o-2 sensitivity (0.77)	2015
6	44	1	zebrafish larvae	zebrafish larvae (60.75, 1.0E-4)	thermal responses (0.37)	2020
7	31	1	toxicity	toxicity (21.52, 1.0E-4)	identification (0.01)	2000
8	28	0.955	maladaptive larval phenotype	maladaptive larval phenotype (49.1, 1.0E-4)	polycyclic aromatic hydrocarbon toxicity (0.19)	2018
9	27	0.964	complex response	complex response (37.81, 1.0E-4)	non-mammalian nerve globin (0.02)	2004
10	26	0.936	oxygen deprivation	oxygen deprivation (25.37, 1.0E-4)	glucose metabolism (0.01)	2002
11	26	0.954	zebrafish danio rerio	ventilatory control (32.06, 1.0E-4)	aquatic vertebrate (0.01)	2006
12	25	0.976	vascular retinopathies	pathological hypoxia-driven angiogenesis (41.95, 1.0E-4)	pathological angiogenesis (0.05)	2009
13	24	1	living zebrafish	hypoxic cell (51.75, 1.0E-4)	circadian rhythm network (0.15)	2017
15	12	1	tibet fish	accelerated genic evolution (31.23, 1.0E-4)	endemic schizothoracine fish (0.01)	2015
28	7	1	rainbow trout	rainbow trout (58.83, 1.0E-4)	persistent effect (0.02)	2012
29	7	0.997	transcriptomic responses	marine medaka (24.63, 1.0E-4)	glucose metabolism (0.01)	2016
39	4	0.996	drug-resistant gene expression	drug-resistant gene expression (22.57, 1.0E-4)	glucose metabolism (0.01)	2015
The largest cluster (#0) has 95 members and a silhouette value of 0.924. It is labeled as hypoxia-inducible transcription factor by LLR, glucose metabolism by LSI, and inducible factor (2.62) by MI. The most relevant citer to the cluster is PELSTER, B (2015.0) Multiplicity of hypoxia-inducible transcription factors and their connection to the circadian clock in the zebrafish. PHYSIOLOGICAL AND BI…
The second largest cluster (#1) has 81 members and a silhouette value of 0.927. It is labeled as respiratory developmental plasticity by both LLR and LSI, and as chuvash polycythemia (0.76) by MI. The most relevant citer to the cluster is YAQOOB, N (2010.0) Cardiovascular and respiratory developmental plasticity under oxygen depleted environment and in genetically hypoxic zebrafish (danio rerio).…
The third largest cluster (#2) has 56 members and a silhouette value of 0.978. It is labeled as gene expression profiling by both LLR and LSI, and as dynamic model (0.09) by MI. The most relevant citer to the cluster is TON, C (2002.0) Construction of a zebrafish cdna microarray: gene expression profiling of the zebrafish during development. BIOCHEMICAL AND BIOPHYSICAL RESEARCH COMMUNICATIONS DOI…
The 4th largest cluster (#3) has 55 members and a silhouette value of 0.996. It is labeled as invasive lionfish by both LLR and LSI, and as range expansion (0.11) by MI. The most relevant citer to the cluster is JOHNSON, E (2016.0) Age, growth and population structure of invasive lionfish (pterois volitans/miles) in northeast florida using a length-based, age-structured population model. PEERJ DO…
The 5th largest cluster (#5) has 46 members and a silhouette value of 0.979. It is labeled as respiratory gases by LLR, signalling pathway by LSI, and o-2 sensitivity (0.77) by MI. The most relevant citer to the cluster is PERRY, S (2016.0) The sensing of respiratory gases in fish: mechanisms and signalling pathways. RESPIRATORY PHYSIOLOGY & NEUROBIOLOGY DOI 10.1016/j.resp.2015.06.007.
The 6th largest cluster (#6) has 44 members and a silhouette value of 1. It is labeled as zebrafish larvae by both LLR and LSI, and as thermal responses (0.37) by MI. The most relevant citer to the cluster is VIEIRA, R (2021.0) Embryonic zebrafish response to a commercial formulation of azoxystrobin at environmental concentrations. ECOTOXICOLOGY AND ENVIRONMENTAL SAFETY DOI 10.1016/j.ecoenv.2021.…
The 7th largest cluster (#7) has 31 members and a silhouette value of 1. It is labeled as toxicity by both LLR and LSI, and as identification (0.01) by MI. The most relevant citer to the cluster is BILLIARD, S (1999.0) Toxicity of retene to early life stages of two freshwater fish species. ENVIRONMENTAL TOXICOLOGY AND CHEMISTRY DOI 10.1002/etc.5620180927.
The 8th largest cluster (#8) has 28 members and a silhouette value of 0.955. It is labeled as maladaptive larval phenotype by both LLR and LSI, and as polycyclic aromatic hydrocarbon toxicity (0.19) by MI. The most relevant citer to the cluster is BAUTISTA, N (2019.0) Parental stressor exposure simultaneously conveys both adaptive and maladaptive larval phenotypes through epigenetic inheritance i…
The 9th largest cluster (#9) has 27 members and a silhouette value of 0.964. It is labeled as complex response by both LLR and LSI, and as non-mammalian nerve globin (0.02) by MI. The most relevant citer to the cluster is ROESNER, A (2006.0) Hypoxia induces a complex response of globin expression in zebrafish (danio rerio). JOURNAL OF EXPERIMENTAL BIOLOGY DOI 10.1242/jeb.02243.
The 10th largest cluster (#10) has 26 members and a silhouette value of 0.936. It is labeled as oxygen deprivation by both LLR and LSI, and as glucose metabolism (0.01) by MI. The most relevant citer to the cluster is PADILLA, P (2001.0) Oxygen deprivation causes suspended animation in the zebrafish embryo. PROCEEDINGS OF THE NATIONAL ACADEMY OF SCIENCES OF THE UNITED STATES OF AMERICA DOI 10.107…
The 11th largest cluster (#11) has 26 members and a silhouette value of 0.954. It is labeled as ventilatory control by LLR, zebrafish danio rerio by LSI, and aquatic vertebrate (0.01) by MI. The most relevant citer to the cluster is VULESEVIC, B (2006.0) Developmental plasticity of ventilatory control in zebrafish, danio rerio. RESPIRATORY PHYSIOLOGY & NEUROBIOLOGY, V154, P10 DOI 10.1016/j.resp.2…
The 12th largest cluster (#12) has 25 members and a silhouette value of 0.976. It is labeled as pathological hypoxia-driven angiogenesis by LLR, vascular retinopathies by LSI, and pathological angiogenesis (0.05) by MI. The most relevant citer to the cluster is VAN, ROOIJEN E (2010.0) Von hippel-lindau tumor suppressor mutants faithfully model pathological hypoxia-driven angiogenesis and vascular…
The 13th largest cluster (#13) has 24 members and a silhouette value of 1. It is labeled as hypoxic cell by LLR, living zebrafish by LSI, and circadian rhythm network (0.15) by MI. The most relevant citer to the cluster is WANG, W (2018.0) A dual-functional luminescent probe for imaging h2s in living zebrafish and discrimination hypoxic cells from normoxic cells. SENSORS AND ACTUATORS B-CHEMICAL …
The 14th largest cluster (#15) has 12 members and a silhouette value of 1. It is labeled as accelerated genic evolution by LLR, tibet fish by LSI, and endemic schizothoracine fish (0.01) by MI. The most relevant citer to the cluster is YANG, L (2015.0) Comprehensive transcriptome analysis reveals accelerated genic evolution in a tibet fish, gymnodiptychus pachycheilus. GENOME BIOLOGY AND EVOLUTIO…
The 15th largest cluster (#28) has 7 members and a silhouette value of 1. It is labeled as rainbow trout by both LLR and LSI, and as persistent effect (0.02) by MI. The most relevant citer to the cluster is VERGAUWEN, L (2013.0) Hypothermal and hyperthermal acclimation differentially modulate cadmium accumulation and toxicity in the zebrafish. CHEMOSPHERE DOI 10.1016/j.chemosphere.2012.12.028.
The 16th largest cluster (#29) has 7 members and a silhouette value of 0.997. It is labeled as marine medaka by LLR, transcriptomic responses by LSI, and glucose metabolism (0.01) by MI. The most relevant citer to the cluster is LAI, K (2016.0) Transcriptomic responses of marine medaka's ovary to hypoxia. AQUATIC TOXICOLOGY DOI 10.1016/j.aquatox.2016.06.023.
The 17th largest cluster (#39) has 4 members and a silhouette value of 0.996. It is labeled as drug-resistant gene expression by both LLR and LSI, and as glucose metabolism (0.01) by MI. The most relevant citer to the cluster is BLACK, J (2015.0) Hypoxia drives transient site-specific copy gain and drug-resistant gene expression. GENES & DEVELOPMENT, V29, P14 DOI 10.1101/gad.259796.115.
CITATION COUNTS
The top ranked item by citation counts is Van ROOIJENE (2009) in Cluster #0, with citation counts of 15. The second one is Robertson CE (2014) in Cluster #5, with citation counts of 15. The third is Semenza GL (2012) in Cluster #0, with citation counts of 13. The 4th is Kopp R (2011) in Cluster #0, with citation counts of 11. The 5th is Santhakumar K (2012) in Cluster #0, with citation counts of …
Citation Counts	References	DOI	Cluster ID
15	Van ROOIJENE, 2009, BLOOD, 113, 6449	10.1182/blood-2008-07-167890	0
15	Robertson CE, 2014, P ROY SOC B-BIOL SCI, 281, 0	10.1098/rspb.2014.0637	5
13	Semenza GL, 2012, CELL, 148, 399	10.1016/j.cell.2012.01.021	0
11	Kopp R, 2011, PHYSIOL GENOMICS, 43, 506	10.1152/physiolgenomics.00250.2010	0
11	Santhakumar K, 2012, CANCER RES, 72, 4017	10.1158/0008-5472.CAN-11-3148	0
10	Howe K, 2013, NATURE, 496, 498	10.1038/nature12111	5
10	Van DERMEERDLM, 2005, AM J PHYSIOL-REG I, 289, 0	10.1152/ajpregu.00089.2005	1
10	Ton C, 2003, PHYSIOL GENOMICS, 13, 97	10.1152/physiolgenomics.00128.2002	2
10	Padilla PA, 2001, P NATL ACAD SCI USA, 98, 7331	10.1073/pnas.131213198	2
10	Pan YK, 2019, J EXP BIOL, 222, 0	10.1242/jeb.204800	4
BURSTS
The top ranked item by bursts is Van ROOIJENE (2009) in Cluster #0, with bursts of 6.78. The second one is Santhakumar K (2012) in Cluster #0, with bursts of 6.09. The third is Ton C (2003) in Cluster #2, with bursts of 5.88. The 4th is Padilla PA (2001) in Cluster #2, with bursts of 5.88. The 5th is Kopp R (2011) in Cluster #0, with bursts of 5.71. The 6th is Van DERMEERDLM (2005) in Cluster #1,…
Bursts	References	DOI	Cluster ID
6.78	Van ROOIJENE, 2009, BLOOD, 113, 6449	10.1182/blood-2008-07-167890	0
6.09	Santhakumar K, 2012, CANCER RES, 72, 4017	10.1158/0008-5472.CAN-11-3148	0
5.88	Ton C, 2003, PHYSIOL GENOMICS, 13, 97	10.1152/physiolgenomics.00128.2002	2
5.88	Padilla PA, 2001, P NATL ACAD SCI USA, 98, 7331	10.1073/pnas.131213198	2
5.71	Kopp R, 2011, PHYSIOL GENOMICS, 43, 506	10.1152/physiolgenomics.00250.2010	0
5.66	Van DERMEERDLM, 2005, AM J PHYSIOL-REG I, 289, 0	10.1152/ajpregu.00089.2005	1
5.45	Semenza GL, 2012, CELL, 148, 399	10.1016/j.cell.2012.01.021	0
5.35	Pan YK, 2019, J EXP BIOL, 222, 0	10.1242/jeb.204800	4
5.33	Robertson CE, 2014, P ROY SOC B-BIOL SCI, 281, 0	10.1098/rspb.2014.0637	5
5.29	Gracey AY, 2001, P NATL ACAD SCI USA, 98, 1993	10.1073/pnas.98.4.1993	2
DEGREE
The top ranked item by degree is Albins MA (2013) in Cluster #3, with degree of 39. The second one is Ton C (2003) in Cluster #2, with degree of 33. The third is Jonz MG (2005) in Cluster #1, with degree of 31. The 4th is Van ROOIJENE (2009) in Cluster #0, with degree of 30. The 5th is Albins MA (2013) in Cluster #3, with degree of 30. The 6th is Kopp R (2011) in Cluster #0, with degree of 27. Th…
Degree	References	DOI	Cluster ID
39	Albins MA, 2013, ENVIRON BIOL FISH, 96, 1151	10.1007/s10641-011-9795-1	3
33	Ton C, 2003, PHYSIOL GENOMICS, 13, 97	10.1152/physiolgenomics.00128.2002	2
31	Jonz MG, 2005, J EXP BIOL, 208, 1537	10.1242/jeb.01564	1
30	Van ROOIJENE, 2009, BLOOD, 113, 6449	10.1182/blood-2008-07-167890	0
30	Albins MA, 2013, BIOL INVASIONS, 15, 29	10.1007/s10530-012-0266-1	3
27	Kopp R, 2011, PHYSIOL GENOMICS, 43, 506	10.1152/physiolgenomics.00250.2010	0
27	Semenza GL, 2012, CELL, 148, 399	10.1016/j.cell.2012.01.021	0
27	Rombough P, 2009, J EXP BIOL, 212, 778	10.1242/jeb.026575	1
26	Gracey AY, 2001, P NATL ACAD SCI USA, 98, 1993	10.1073/pnas.98.4.1993	2
26	Rojas DA, 2007, GENE EXPR PATTERNS, 7, 339	10.1016/j.modgep.2006.08.002	1
CENTRALITY
The top ranked item by centrality is Burggren WW (2016) in Cluster #5, with centrality of 0.23. The second one is Corrales J (2014) in Cluster #8, with centrality of 0.22. The third is Edmunds RC (2015) in Cluster #8, with centrality of 0.22. The 4th is Rombough P (2009) in Cluster #1, with centrality of 0.20. The 5th is Howe K (2013) in Cluster #5, with centrality of 0.20. The 6th is Van ROOIJEN…
Centrality	References	DOI	Cluster ID
0.23	Burggren WW, 2016, AM J PHYSIOL-REG I, 311, 0	10.1152/ajpregu.00022.2016	5
0.22	Corrales J, 2014, AQUAT TOXICOL, 148, 16	10.1016/j.aquatox.2013.12.028	8
0.22	Edmunds RC, 2015, SCI REP-UK, 5, 0	10.1038/srep17326	8
0.2	Rombough P, 2009, J EXP BIOL, 212, 778	10.1242/jeb.026575	1
0.2	Howe K, 2013, NATURE, 496, 498	10.1038/nature12111	5
0.19	Van ROOIJENE, 2009, BLOOD, 113, 6449	10.1182/blood-2008-07-167890	0
0.17	Jonz MG, 2005, J EXP BIOL, 208, 1537	10.1242/jeb.01564	1
0.15	Porteus CS, 2014, J PHYSIOL-LONDON, 592, 3075	10.1113/jphysiol.2014.271098	5
0.14	Semenza GL, 2012, CELL, 148, 399	10.1016/j.cell.2012.01.021	0
0.13	Rombough P, 2002, J EXP BIOL, 205, 1787		9
SIGMA
The top ranked item by sigma is Van ROOIJENE (2009) in Cluster #0, with sigma of 3.17. The second one is Howe K (2013) in Cluster #5, with sigma of 2.14. The third is Semenza GL (2012) in Cluster #0, with sigma of 2.08. The 4th is Porteus CS (2014) in Cluster #5, with sigma of 1.83. The 5th is Robertson CE (2014) in Cluster #5, with sigma of 1.80. The 6th is Jonz MG (2005) in Cluster #1, with sig…
Sigma	References	DOI	Cluster ID
3.17	Van ROOIJENE, 2009, BLOOD, 113, 6449	10.1182/blood-2008-07-167890	0
2.14	Howe K, 2013, NATURE, 496, 498	10.1038/nature12111	5
2.08	Semenza GL, 2012, CELL, 148, 399	10.1016/j.cell.2012.01.021	0
1.83	Porteus CS, 2014, J PHYSIOL-LONDON, 592, 3075	10.1113/jphysiol.2014.271098	5
1.8	Robertson CE, 2014, P ROY SOC B-BIOL SCI, 281, 0	10.1098/rspb.2014.0637	5
1.75	Jonz MG, 2005, J EXP BIOL, 208, 1537	10.1242/jeb.01564	1
1.68	Van DERMEERDLM, 2005, AM J PHYSIOL-REG I, 289, 0	10.1152/ajpregu.00089.2005	1
1.51	Shakarchi K, 2013, J EXP BIOL, 216, 869	10.1242/jeb.079657	5
1.5	Ton C, 2003, PHYSIOL GENOMICS, 13, 97	10.1152/physiolgenomics.00128.2002	2
1.5	Kopp R, 2011, PHYSIOL GENOMICS, 43, 506	10.1152/physiolgenomics.00250.2010	0

## Sheet: zebrafish reference network
Freq	Burst	Degree	Centrality	Sigma	PageRank	Keyword	Author	Year	Title	Source	Vol	Page	Half-life	DOI	ClusterID
15	6.78	30	0.19	3.17	0		Van ROOIJENE	2009	...	BLOOD	113	6449	2.5	10.1182/blood-2008-07-167890	0
10	4.19	12	0.2	2.14	0		Howe K	2013	...	NATURE	496	498	2.5	10.1038/nature12111	5
13	5.45	27	0.14	2.08	0		Semenza GL	2012	...	CELL	148	399	3.5	10.1016/j.cell.2012.01.021	0
8	4.36	11	0.15	1.83	0		Porteus CS	2014	...	J PHYSIOL-LONDON	592	3075	1.5	10.1113/jphysiol.2014.271098	5
15	5.33	21	0.12	1.8	0		Robertson CE	2014	...	P ROY SOC B-BIOL SCI	281	0	2.5	10.1098/rspb.2014.0637	5
7	3.54	31	0.17	1.75	0		Jonz MG	2005	...	J EXP BIOL	208	1537	0.5	10.1242/jeb.01564	1
10	5.66	21	0.1	1.68	0		Van DERMEERDLM	2005	...	AM J PHYSIOL-REG I	289	0	3.5	10.1152/ajpregu.00089.2005	1
9	4.26	12	0.1	1.51	0		Shakarchi K	2013	...	J EXP BIOL	216	869	2.5	10.1242/jeb.079657	5
10	5.88	33	0.07	1.5	0		Ton C	2003	...	PHYSIOL GENOMICS	13	97	3.5	10.1152/physiolgenomics.00128.2002	2
11	5.71	27	0.07	1.5	0		Kopp R	2011	...	PHYSIOL GENOMICS	43	506	2.5	10.1152/physiolgenomics.00250.2010	0
9	4.64	26	0.08	1.43	0		Rojas DA	2007	...	GENE EXPR PATTERNS	7	339	2.5	10.1016/j.modgep.2006.08.002	1
8	4.56	26	0.08	1.42	0		Egg M	2013	...	CHRONOBIOL INT	30	510	1.5	10.3109/07420528.2012.754447	0
10	5.88	23	0.04	1.25	0		Padilla PA	2001	...	P NATL ACAD SCI USA	98	7331	3.5	10.1073/pnas.131213198	2
9	5.29	26	0.04	1.22	0		Gracey AY	2001	...	P NATL ACAD SCI USA	98	1993	3.5	10.1073/pnas.98.4.1993	2
7	3.41	4	0.06	1.2	0		Macrae CA	2015	...	NAT REV DRUG DISCOV	14	721	2.5	10.1038/nrd4627	13
11	6.09	12	0.02	1.1	0		Santhakumar K	2012	...	CANCER RES	72	4017	2.5	10.1158/0008-5472.CAN-11-3148	0
7	4.16	12	0.01	1.05	0		Cao RH	2008	...	PLOS ONE	3	0	1.5	10.1371/journal.pone.0002748	12
9	4.35	9	0.01	1.04	0		Van ROOIJENE	2010	...	DIS MODEL MECH	3	343	2.5	10.1242/dmm.004036	0
7	3.53	5	0.01	1.04	0		Spence R	2008	...	BIOL REV	83	13	3.5	10.1111/j.1469-185X.2007.00030.x	28
10	5.35	23	0	1.02	0		Pan YK	2019	...	J EXP BIOL	222	0	1.5	10.1242/jeb.204800	4
6	3.55	7	0.01	1.02	0		Lee SLC	2009	...	P NATL ACAD SCI USA	106	19485	0.5	10.1073/pnas.0909228106	12
6	3.42	14	0.01	1.02	0		Zhang P	2012	...	AM J PHYSIOL-REG I	303	0	2.5	10.1152/ajpregu.00340.2012	0
7	3.81	22	0	1.01	0		Green SJ	2012	...	PLOS ONE	7	0	4.5	10.1371/journal.pone.0032596	3
7	4.12	10	0	1.01	0		Qin Z	2010	...	J PHYSIOL-LONDON	588	861	3.5	10.1113/jphysiol.2009.184739	5
8	3.97	17	0	1.01	0		Gerri C	2017	...	NAT COMMUN	8	0	2.5	10.1038/ncomms15492	4
6	3.56	12	0	1.01	0		Nikinmaa M	2005	...	AM J PHYSIOL-REG I	288	0	3.5	10.1152/ajpregu.00626.2004	1
1		2	0	1	0		Acosta L	2004	...	DEV DYNAM	230	131	3.5	10.1002/dvdy.20023	2
2		13	0	1	0		Diller JL	2014	...	J EXP MAR BIOL ECOL	455	45	1.5	10.1016/j.jembe.2014.02.014	3
2		10	0.01	1	0		Rytkonen KT	2011	...	MOL BIOL EVOL	28	1913	2.5	10.1093/molbev/msr012	0
1		1	0	1	0		Abreu BJ	2008	...	NEUROCHEM INT	53	155	3.5	10.1016/j.neuint.2008.07.004	0
2		7	0.02	1	0		Bambino K	2017	...	CURR TOP DEV BIOL	124	331	3.5	10.1016/bs.ctdb.2016.10.007	6
2		5	0	1	0		Chan WK	1999	...	J BIOL CHEM	274	12115	4.5	10.1074/jbc.274.17.12115	7
1		7	0	1	0		Fragoso NM	1999	...	IN PRESS ENV TOXICOL	0	0	-0.5		7
1		5	0	1	0		Gerber HP	2002	...	NATURE	417	954	0.5	10.1038/nature00821	9
2		7	0	1	0		Gavriouchkina D	2010	...	PLOS ONE	5	0	3.5	10.1371/journal.pone.0012542	0
4		0	0	1	0		Rouhi P	2010	...	NAT PROTOC	5	1911	4.5	10.1038/nprot.2010.150	77
2		6	0	1	0		Rouhi P	2010	...	CELL CYCLE	9	913	-0.5	10.4161/cc.9.5.10853	12
2		0	0	1	0		Lammer E	2009	...	COMP BIOCHEM PHYS C	149	196	4.5	10.1016/j.cbpc.2008.11.006	78
1		3	0	1	0		Alex D	2010	...	J CELL BIOCHEM	109	339	1.5	10.1002/jcb.22405	0
2		8	0	1	0		Cao FJ	2016	...	ENVIRON POLLUT	219	1109	4.5	10.1016/j.envpol.2016.09.015	6
2		4	0	1	0		Li H	2018	...	ECOTOX ENVIRON SAFE	151	1	2.5	10.1016/j.ecoenv.2017.12.061	6
1		0	0	1	0		Cheng SH	2000	...	ENVIRON TOXICOL CHEM	19	3024	4.5	10.1002/etc.5620191223	79
2		4	0	1	0		Hogan BM	2009	...	NAT GENET	41	396	0.5	10.1038/ng.321	12
2		5	0	1	0		Kim S	2014	...	GENOME RES	24	1012	3.5	10.1101/gr.171322.113	31
3		6	0	1	0		Fernandino JI	2013	...	GEN COMP ENDOCR	192	36	3.5	10.1016/j.ygcen.2013.05.024	5
2		7	0	1	0		Chen N	2012	...	GENE	498	81	0.5	10.1016/j.gene.2011.12.058	0
2		4	0.1	1	0		Bai XY	2010	...	CELL	142	133	4.5	10.1016/j.cell.2010.05.028	0
1		8	0	1	0		*jand SCISOFTW	1994	...	SIGM STAT SOFTW	0	0	4.5		7
2		0	0	1	0		Berry MA	2017	...	ENVIRON MICROBIOL	19	1149	0.5	10.1111/1462-2920.13640	80
2		2	0	1	0		Lin QN	2013	...	ADV MATER	25	1981	4.5	10.1002/adma.201204455	13
2		3	0	1	0		Hamilton TJ	2014	...	P ROY SOC B-BIOL SCI	281	0	2.5	10.1098/rspb.2013.2509	30
2		1	0	1	0		Le ROYA	2017	...	SCI REP-UK	7	0	0.5	10.1038/s41598-017-03300-z	6
2		0	0	1	0		Bugel SEANM	2014	...	CURR ENVIRON HEALTH REP	1	341	4.5		81
2		1	0	1	0		Griffitt RJ	2013	...	AQUAT TOXICOL	130	192	4.5	10.1016/j.aquatox.2013.01.010	61
2		0	0	1	0		Benedito R	2012	...	NATURE	484	110	4.5	10.1038/nature10908	82
2		2	0	1	0		Alday A	2014	...	PHARMACOL RES	84	26	1.5	10.1016/j.phrs.2014.03.011	5
3		5	0	1	0		Giacomin M	2019	...	J EXP BIOL	222	0	0.5	10.1242/jeb.206599	19
2		3	0	1	0		Sun CF	2011	...	GEN COMP ENDOCR	172	409	2.5	10.1016/j.ygcen.2011.04.005	0
2		4	0	1	0		Han HW	2014	...	PLOS ONE	9	0	1.5	10.1371/journal.pone.0086345	0
2		5	0	1	0		Hwang PP	2009	...	J EXP BIOL	212	1745	1.5	10.1242/jeb.026054	1
2		3	0	1	0		Chen Z	2013	...	J CLIN INVEST	123	1057	3.5	10.1172/JCI65344	0
2		10	0	1	0		Johnston MW	2014	...	BIOL INVASIONS	16	2681	0.5	10.1007/s10530-014-0696-z	3
1		3	0	1	0		Agencia NACIONALDEVIGILANCIASANITARIA(ANVISA)	2018	...	232018 ANVISA	0	0	3.5		43
3		3	0	1	0		Barrionuevo WR	2010	...	BRAZ J BIOL	70	425	4.5	10.1590/S1519-69842010000200027	5
2		5	0	1	0		Krock BRYANL	2011	...	GENES CANCER	2	1117	4.5	10.1177/1947601911423654	0
1		5	0	1	0		Boone AN	2002	...	AM J PHYSIOL-REG I	283	0	2.5	10.1152/ajpregu.00125.2002	22
3		9	0.01	1	0		Alvarez Y	2007	...	BMC DEV BIOL	7	0	2.5	10.1186/1471-213X-7-114	12
2		4	0	1	0		Decourten B	2019	...	SEP SCI TECHNOL-SER	11	13	1.5	10.1016/B978-0-12-815730-5.00002-8	6
2		7	0	1	0		Cossins A	2006	...	J EXP BIOL	209	2328	3.5	10.1242/jeb.02256	1
1		0	0	1	0		Aparicio S	2002	...	SCIENCE	297	1301	2.5	10.1126/science.1072104	83
1		8	0	1	0		Ferrara N	1999	...	CURR TOP MICROBIOL	237	1	1.5		20
4		13	0	1	0		Abdallah SJ	2012	...	ADV EXP MED BIOL	758	143	3.5	10.1007/978-94-007-4584-1_20	5
2		2	0	1	0		Aliko V	2015	...	BRAZ ARCH BIOL TECHN	58	750	4.5	10.1590/S1516-89132015050244	47
2		6	0	1	0		Buckler KJ	2000	...	J PHYSIOL-LONDON	525	135	4.5	10.1111/j.1469-7793.2000.00135.x	10
2		1	0	1	0		Veneman WJ	2017	...	AQUAT TOXICOL	190	112	4.5	10.1016/j.aquatox.2017.06.014	48
2		1	0	1	0		Cannino G	2018	...	FRONT ONCOL	8	0	2.5	10.3389/fonc.2018.00333	4
2		6	0.02	1	0		Brodin T	2014	...	PHILOS T R SOC B	369	0	3.5	10.1098/rstb.2013.0580	13
1		2	0	1	0		Abbink W	2012	...	AQUACULTURE	330	130	1.5	10.1016/j.aquaculture.2011.11.043	49
1		0	0	1	0		Ahsan B	2008	...	NUCLEIC ACIDS RES	36	0	0.5	10.1093/nar/gkm765	84
3		6	0	1	0		Diaz N	2015	...	BMC GENOMICS	16	0	1.5	10.1186/s12864-015-1862-0	5
2		4	0	1	0		Clark BW	2013	...	ENVIRON SCI TECHNOL	47	10556	3.5	10.1021/es401604b	8
2		3	0	1	0		Chung WS	2014	...	J EXP BIOL	217	323	1.5	10.1242/jeb.092478	30
1		5	0	1	0		Amatruda JF	2002	...	CANCER CELL	1	229	3.5	10.1016/S1535-6108(02)00052-1	32
1		6	0	1	0		Bradley BP	2002	...	MAR ENVIRON RES	54	373	2.5	10.1016/S0141-1136(02)00115-0	2
2		6	0	1	0		Ju ZL	2007	...	COMP BIOCHEM PHYS C	145	134	1.5	10.1016/j.cbpc.2006.06.012	1
3		9	0	1	0		Dahl KA	2019	...	MAR ECOL PROG SER	623	145	0.5	10.3354/meps13028	3
2		8	0	1	0		Gilmour KM	2007	...	FISH PHYSIOL	25	97	2.5	10.1016/S1546-5098(06)25003-9	1
1		2	0	1	0		Chenna R	2003	...	NUCLEIC ACIDS RES	31	3497	3.5	10.1093/nar/gkg500	50
2		5	0	1	0		Grunwald DJ	2002	...	NAT REV GENET	3	717	3.5	10.1038/nrg892	32
1		6	0	1	0		Burggren W	1997	...	HDB PHYSL	0	215	1.5		27
3		11	0.05	1	0		Bagatto B	2005	...	COMP BIOCHEM PHYS A	141	391	3.5	10.1016/j.cbpb.2005.07.002	1
4		11	0.22	1	0		Edmunds RC	2015	...	SCI REP-UK	5	0	3.5	10.1038/srep17326	8
2		4	0	1	0		Comte L	2017	...	NAT CLIM CHANGE	7	718	2.5	10.1038/NCLIMATE3382	4
2		2	0	1	0		Ahn GO	2014	...	P NATL ACAD SCI USA	111	2698	1.5	10.1073/pnas.1320243111	0
3		2	0	1	0		Sparrow DB	2012	...	CELL	149	295	0.5	10.1016/j.cell.2012.02.054	0
1		3	0	1	0		Segner H	1990	...	MAR BIOL	105	353	3.5	10.1007/BF01316306	17
1		3	0	1	0		Chittenden TW	2006	...	DEV CELL	10	783	0.5	10.1016/j.devcel.2006.03.012	11
1		1	0	1	0		Amaral FM	2017	...	WATER SCI TECHNOL	76	3319	4.5	10.2166/wst.2017.378	65
1		10	0	1	0		Affonso EG	2002	...	COMP BIOCHEM PHYS C	133	375	3.5	10.1016/S1532-0456(02)00127-8	9
2		4	0	1	0		Wang Z	2007	...	BIOCHEM BIOPH RES CO	357	26	4.5	10.1016/j.bbrc.2007.03.094	0
2		1	0	1	0		Chen YM	2016	...	NANOTOXICOLOGY	10	42	2.5	10.3109/17435390.2015.1005032	51
2		9	0	1	0		Blakeway RD	2020	...	FISHERIES MANAG ECOL	27	227	-0.5	10.1111/fme.12404	3
1		1	0	1	0		Berra E	2003	...	EMBO J	22	4082	3.5	10.1093/emboj/cdg392	60
4		2	0	1	0		Guan LH	2014	...	BMC EVOL BIOL	14	0	3.5	10.1186/s12862-014-0192-1	15
2		2	0	1	0		Chen LG	2018	...	ENVIRON SCI TECHNOL	52	2323	0.5	10.1021/acs.est.7b06322	51
1		6	0	1	0		Burmester T	2000	...	NATURE	407	520	3.5	10.1038/35035093	9
3		4	0	1	0		Schwerte T	2006	...	J EXP BIOL	209	1093	4.5	10.1242/jeb.02117	1
1		4	0	1	0		Corton JC	1996	...	TOXICOL APPL PHARM	139	272	3.5	10.1006/taap.1996.0166	7
2		7	0	1	0		Herold S	2004	...	J BIOL CHEM	279	22841	3.5	10.1074/jbc.M313732200	9
3		2	0	1	0		Adams RH	2007	...	NAT REV MOL CELL BIO	8	464	2.5	10.1038/nrm2183	12
1		3	0	1	0		Fan CM	1996	...	MOL CELL NEUROSCI	7	1	3.5	10.1006/mcne.1996.0001	7
2		4	0	1	0		Hwang PP	2010	...	FISH PHYSIOL	29	311	0.5	10.1016/S1546-5098(10)02908-0	1
1		3	0	1	0		Granato M	1996	...	CURR OPIN GENET DEV	6	461	3.5	10.1016/S0959-437X(96)80068-2	7
2		4	0	1	0		Jain RK	2005	...	SCIENCE	307	58	4.5	10.1126/science.1104819	12
2		12	0	1	0		Morris JA	2009	...	BIOL ECOLOGY CONTROL	0	0	2.5		3
1		4	0	1	0		Andrievsky G	2005	...	FULLER NANOTUB CAR N	13	363	2.5	10.1080/15363830500237267	14
1		3	0	1	0		Versteeg DJ	1992	...	ENVIRON TOXICOL CHEM	11	571	2.5	10.1002/etc.5620110415	16
1		2	0	1	0		Callard GV	2001	...	J STEROID BIOCHEM	79	305	3.5	10.1016/S0960-0760(01)00147-9	52
1		8	0	1	0		Bray S	1998	...	SEMIN CELL DEV BIOL	9	591	2.5	10.1006/scdb.1998.0262	20
1		0	0	1	0		Akdogan-ozdilek B	2022	...	DEV DYNAM	251	729	-0.5	10.1002/dvdy.430	85
4		12	0	1	0		Zhu XS	2007	...	ENVIRON TOXICOL CHEM	26	976	1.5	10.1897/06-583.1	14
5		14	0	1	0		Jud ZR	2012	...	J EXP MAR BIOL ECOL	414	69	3.5	10.1016/j.jembe.2012.01.015	3
2		7	0	1	0		Oberdorster E	2006	...	CARBON	44	1112	2.5	10.1016/j.carbon.2005.11.008	14
5		18	0.03	1	0		Jacob E	2002	...	AM J PHYSIOL-REG I	283	0	3.5	10.1152/ajpregu.00673.2001	11
1		8	0	1	0		**noaanationaldatabuoycentre	2010	...	STAT SPGF1 SEA TEMP	0	0	1.5		3
1		1	0	1	0		Ahmad S	2011	...	VASC CELL	3	0	0.5	10.1186/2045-824X-3-15	0
1		5	0	1	0		Han VKM	2000	...	PLACENTA	21	289	1.5	10.1053/plac.1999.0498	2
1		11	0	1	0		Bruggemann R	1994	...	DTSCH GEWASSERKUNDLI	38	122	0.5		16
1		4	0	1	0		Steinberg CEW	1993	...	CHEM SPEC BIOAVAILAB	5	1	1.5		16
2		10	0.01	1	0		Burmester T	2002	...	MOL BIOL EVOL	19	416	1.5	10.1093/oxfordjournals.molbev.a004096	9
2		4	0	1	0		Geurden I	2014	...	J EXP BIOL	217	3396	3.5	10.1242/jeb.106062	6
2		4	0	1	0		Hernandez-hernandez N	2018	...	FRONT MAR SCI	5	0	0.5	10.3389/fmars.2018.00213	36
2		1	0	1	0		Fernandez-murray JP	2016	...	PLOS GENET	12	0	3.5	10.1371/journal.pgen.1005783	4
1		0	0	1	0		Aboelzahab A	2012	...	INT SCH RES NOTICES	2012	1	1.5		86
2		10	0	1	0		Darling ES	2011	...	BIOL INVASIONS	13	2045	3.5	10.1007/s10530-011-0020-0	3
2		3	0	1	0		Guillaumond F	2008	...	BIOCHEM BIOPH RES CO	369	1184	1.5	10.1016/j.bbrc.2008.03.009	1
2		7	0	1	0		Ngan AK	2009	...	COMP BIOCHEM PHYS B	154	396	3.5	10.1016/j.cbpb.2009.08.003	0
2		1	0	1	0		Capkin E	2017	...	CHEMOSPHERE	182	720	0.5	10.1016/j.chemosphere.2017.05.093	61
2		1	0	1	0		Gattuso A	2018	...	FRONT PHYSIOL	9	0	2.5	10.3389/fphys.2018.00366	6
2		8	0	1	0		Bigham A	2010	...	PLOS GENET	6	0	4.5	10.1371/journal.pgen.1001116	15
3		8	0.01	1	0		Thomas P	2012	...	P ROY SOC B-BIOL SCI	279	28	4.5	10.1098/rspb.2011.0529	8
5		14	0.13	1	0		Rombough P	2002	...	J EXP BIOL	205	1787	3.5		9
2		0	0	1	0		Hanahan D	2011	...	CELL	144	646	3.5	10.1016/j.cell.2011.02.013	87
1		5	0	1	0		Boos S	1995	...	BERL MUNCH TIERARZTL	108	253	4.5		33
1		7	0	1	0		Giannini AL	2000	...	EXP CELL RES	255	207	1.5	10.1006/excr.1999.4785	2
4		4	0	1	0		Gemberling M	2015	...	ELIFE	4	0	3.5	10.7554/eLife.05871	26
2		1	0	1	0		Duva G	2015	...	NAT CELL BIOL	17	627	3.5	10.1038/ncb3149	26
1		3	0	1	0		Ahamed M	2010	...	CLIN CHIM ACTA	411	1841	1.5	10.1016/j.cca.2010.08.016	40
2		2	0	1	0		Faggio C	2016	...	AQUAT TOXICOL	180	258	3.5	10.1016/j.aquatox.2016.10.010	47
2		1	0	1	0		Elks PM	2015	...	DIS MODEL MECH	8	1349	4.5	10.1242/dmm.021865	4
2		12	0	1	0		Benkwitt CE	2016	...	ECOLOGY	97	2729	0.5	10.1002/ecy.1477	3
2		4	0	1	0		Aspatwar A	2019	...	JOVE-J VIS EXP	0	0	0.5	10.3791/59315	4
2		9	0	1	0		Dahl KA	2018	...	BIOL INVASIONS	20	3513	1.5	10.1007/s10530-018-1791-3	3
2		3	0	1	0		Wu RSS	2009	...	FISH PHYSIOL	27	79	2.5	10.1016/S1546-5098(08)00003-4	1
1		6	0	1	0		Aguirre-ghiso JA	2007	...	NAT REV CANCER	7	834	1.5	10.1038/nrc2256	12
4		1	0	1	0		Rytkonen KT	2014	...	GENE	541	60	1.5	10.1016/j.gene.2014.03.007	5
1		6	0	1	0		Boue-grabot E	2000	...	J NEUROCHEM	75	1600	2.5	10.1046/j.1471-4159.2000.0751600.x	10
1		6	0	1	0		Coverdale LE	2004	...	CURR GENOMICS	5	395	0.5	10.2174/1389202043349138	2
2		5	0	1	0		Nissen LJ	2007	...	J CLIN INVEST	117	2766	2.5	10.1172/JCI32479	12
1		6	0	1	0		Burleson ML	2002	...	RESP PHYSIOL NEUROBI	131	223	1.5	10.1016/S1569-9048(02)00019-8	10
4		10	0	1	0		Mandic M	2019	...	J EXP BIOL	222	0	1.5	10.1242/jeb.195198	4
2		4	0	1	0		Luzio A	2016	...	AQUAT TOXICOL	175	90	1.5	10.1016/j.aquatox.2016.03.014	13
2		5	0	1	0		Sayes CM	2004	...	NANO LETT	4	1881	3.5	10.1021/nl0489586	14
1		1	0	1	0		Bilotta J	2000	...	BEHAV BRAIN RES	116	81	3.5	10.1016/S0166-4328(00)00264-3	62
2		7	0	1	0		Ramsden CS	2009	...	ECOTOXICOLOGY	18	939	3.5	10.1007/s10646-009-0357-7	21
3		8	0	1	0		Tzaneva V	2014	...	RESP PHYSIOL NEUROBI	199	1	1.5	10.1016/j.resp.2014.04.006	5
2		1	0	1	0		Baekelandt S	2018	...	GEN COMP ENDOCR	258	194	2.5	10.1016/j.ygcen.2017.08.010	4
1		6	0	1	0		Burggren WW	1997	...	DEV CARDIOVASCULAR S	0	0	1.5		27
2		6	0	1	0		Link V	2006	...	BMC DEV BIOL	6	0	2.5	10.1186/1471-213X-6-1	1
2		2	0	1	0		Bilyk KT	2013	...	BMC GENOMICS	14	0	1.5	10.1186/1471-2164-14-634	15
1		1	0	1	0		Anderson L	2005	...	J PHYSIOL-LONDON	563	23	2.5	10.1113/jphysiol.2004.080473	63
1		3	0	1	0		Asz J	2006	...	J PEDIATR SURG	41	9	1.5		14
1		9	0	1	0		Braunbeck T	1994	...	IN PRESS 17 P EIFAC	0	0	-0.5		17
1		2	0	1	0		Airas S	2008	...	ECOTOX ENVIRON SAFE	70	475	4.5	10.1016/j.ecoenv.2007.06.004	28
2		8	0.01	1	0		Thisse C	2008	...	NAT PROTOC	3	59	2.5	10.1038/nprot.2007.514	1
5		4	0	1	0		Team RC	2020	...	R LANG ENV STAT COMP	0	0	-0.5		35
3		1	0	1	0		Kwong RWM	2014	...	J EXP BIOL	217	651	4.5	10.1242/jeb.091603	64
1		6	0	1	0		Barut BA	2000	...	PHYSIOL GENOMICS	2	49	2.5	10.1152/physiolgenomics.2000.2.2.49	9
2		8	0	1	0		Burleson ML	2006	...	BRAIN RES	1092	100	3.5	10.1016/j.brainres.2006.03.085	1
2		2	0	1	0		Landry CA	2007	...	COMP BIOCHEM PHYS A	148	317	4.5	10.1016/j.cbpa.2007.04.023	1
1		6	0	1	0		Duan CM	1999	...	P NATL ACAD SCI USA	96	15274	2.5	10.1073/pnas.96.26.15274	2
1		7	0	1	0		*epa	2007	...	100B07001 EPA SCI PO	0	0	1.5		14
4		8	0	1	0		Burggren WW	2011	...	RESP PHYSIOL NEUROBI	178	13	3.5	10.1016/j.resp.2011.05.001	0
2		0	0	1	0		Chang YC	2019	...	J FISH DIS	42	1433	1.5	10.1111/jfd.13073	88
2		9	0	1	0		Dubansky B	2018	...	DEV ENV	0	0	0.5		8
1		1	0	1	0		Andersen L	2003	...	COMP BIOCHEM PHYS C	134	365	4.5	10.1016/S1532-0456(03)00006-1	75
4		4	0	1	0		Du J	2015	...	J IMMUNOL	195	1782	4.5	10.4049/jimmunol.1500588	0
2		4	0	1	0		Hardie DG	2007	...	NAT REV MOL CELL BIO	8	774	3.5	10.1038/nrm2249	1
2		13	0.05	1	0		Abnet CC	1999	...	J BIOL CHEM	274	15159	1.5	10.1074/jbc.274.21.15159	7
2		6	0	1	0		Li Z	2013	...	ANAL CHEM	85	3926	4.5	10.1021/ac400750r	13
2		11	0	1	0		Forristal CE	2010	...	REPRODUCTION	139	85	4.5	10.1530/REP-09-0300	0
2		4	0	1	0		Liu JW	2017	...	SCI REP-UK	7	0	0.5	10.1038/s41598-017-00458-4	6
2		11	0.01	1	0		Edgar RS	2012	...	NATURE	485	459	2.5	10.1038/nature11088	0
1		2	0	1	0		Braun MH	2003	...	J EXP BIOL	206	3311	1.5	10.1242/jeb.00575	53
8		18	0.01	1	0		Coccimiglio ML	2012	...	J EXP BIOL	215	3881	3.5	10.1242/jeb.074575	5
3		4	0.01	1	0		Tucker NR	2011	...	PLOS ONE	6	0	3.5	10.1371/journal.pone.0022268	0
2		4	0	1	0		Westerfield M	2007	...	ZEBRAFISH BOOK GUIDE	0	0	3.5		1
3		2	0.01	1	0		Schnurr ME	2014	...	J EXP BIOL	217	1370	4.5	10.1242/jeb.094037	5
5		23	0.05	1	0		Shang EHH	2006	...	ENVIRON SCI TECHNOL	40	3118	2.5	10.1021/es0522579	1
2		3	0	1	0		Gonzalez P	2005	...	ENVIRON SCI TECHNOL	39	3972	4.5	10.1021/es0483490	1
2		9	0	1	0		Dahl KA	2017	...	BIOL INVASIONS	19	1917	2.5	10.1007/s10530-017-1407-3	3
2		5	0	1	0		Li JW	2014	...	GENOMICS	103	56	1.5	10.1016/j.ygeno.2013.12.005	29
2		4	0	1	0		Hillegass JM	2008	...	TOXICOL SCI	102	413	4.5	10.1093/toxsci/kfn010	0
1		3	0	1	0		Drutel G	1999	...	EUR J NEUROSCI	11	1545	0.5	10.1046/j.1460-9568.1999.00562.x	7
2		6	0	1	0		Hankeln T	2005	...	J INORG BIOCHEM	99	110	0.5	10.1016/j.jinorgbio.2004.11.009	9
1		8	0	1	0		@phaseannunziato K,2018,DEVENV,V0,PP115,DOI101007/	1000	...	LENS	0	0	1021.5		4
2		7	0	1	0		Templeton RC	2006	...	ENVIRON SCI TECHNOL	40	7387	2.5	10.1021/es060407p	14
2		0	0	1	0		Jayasinghe CD	2019	...	EVID-BASED COMPL ALT	2019	0	1.5	10.1155/2019/7272808	89
2		2	0	1	0		Gameiro PA	2013	...	CELL METAB	17	372	1.5	10.1016/j.cmet.2013.02.002	39
1		9	0	1	0		Goodrich MS	1991	...	ENVIRON TOXICOL CHEM	10	509	3.5	10.1897/1552-8618(1991)10[509:AALTOW]2.0.CO;2	16
1		11	0	1	0		Bruggemann R	1994	...	CHEMOSPHERE	28	863	0.5	10.1016/0045-6535(94)90003-5	16
2		3	0	1	0		Doney SC	2012	...	ANNU REV MAR SCI	4	11	4.5	10.1146/annurev-marine-041911-111611	5
2		2	0	1	0		Blazquez M	2008	...	GEN COMP ENDOCR	158	95	2.5	10.1016/j.ygcen.2008.06.001	54
2		6	0	1	0		Nilsson GE	2004	...	J EXP BIOL	207	3131	3.5	10.1242/jeb.00979	9
1		8	0	1	0		Chavrier P	1999	...	CURR OPIN CELL BIOL	11	466	3.5	10.1016/S0955-0674(99)80067-2	2
1		5	0	1	0		Basu N	2001	...	GEN COMP ENDOCR	124	97	3.5	10.1006/gcen.2001.7688	22
2		2	0	1	0		Liegeois S	2006	...	J CELL BIOL	173	949	3.5	10.1083/jcb.200511072	56
2		4	0	1	0		Stoletov K	2007	...	P NATL ACAD SCI USA	104	17406	2.5	10.1073/pnas.0703446104	12
1		0	0	1	0		Akerman CJ	2006	...	J NEUROSCI	26	5117	2.5	10.1523/JNEUROSCI.0319-06.2006	90
5		11	0	1	0		Regan KS	2011	...	J EXP BIOL	214	2560	4.5	10.1242/jeb.056333	5
1		2	0	1	0		Courselaud B	2002	...	J BIOL CHEM	277	41163	1.5	10.1074/jbc.M202653200	55
1		9	0	1	0		Cazalets JR	1996	...	J NEUROSCI	16	298	3.5		18
1		6	0	1	0		Drapeau P	1999	...	J NEUROSCI METH	88	1	0.5	10.1016/S0165-0270(99)00008-4	18
1		2	0	1	0		Belay HT	2003	...	CELL STRESS CHAPERON	8	395	2.5	2.0.CO;2>10.1379/1466-1268(2003)008<0395:SAOCDA>2.0.CO;2	22
1		4	0	1	0		Androutsellistha	2006	...	NATURE	0	0	1.5		2
6		19	0.04	1	0		Farrell AP	2007	...	J EXP BIOL	210	1715	2.5	10.1242/jeb.02781	1
2		3	0	1	0		Klionsky DJ	2012	...	AUTOPHAGY	8	445	1.5	10.4161/auto.19496	41
2		8	0	1	0		Navarro E	2008	...	ECOTOXICOLOGY	17	372	4.5	10.1007/s10646-008-0214-0	21
2		7	0	1	0		Semenza GL	2010	...	WIRES SYST BIOL MED	2	336	1.5	10.1002/wsbm.69	0
2		5	0.02	1	0		Hala D	2012	...	J EXP BIOL	215	1753	3.5	10.1242/jeb.066027	29
1		5	0	1	0		Al-ani B	2006	...	PLOS ONE	1	0	2.5	10.1371/journal.pone.0000025	1
3		4	0	1	0		Vulesevic B	2006	...	J EXP BIOL	209	1261	3.5	10.1242/jeb.02058	1
1		2	0	1	0		Baxter EJ	2005	...	LANCET	365	1054	1.5	10.1016/S0140-6736(05)71142-9	34
2		11	0	1	0		Grillitsch S	2005	...	J EXP BIOL	208	309	4.5	10.1242/jeb.01410	1
1		3	0	1	0		Voigt K	1994	...	MAY P NATL ONL M	0	427	0.5		16
2		2	0	1	0		Valdivieso A	2020	...	ENVIRON RES	186	0	1.5	10.1016/j.envres.2020.109601	46
1		6	0	1	0		Baum O	2004	...	AM J PHYSIOL-HEART C	287	0	2.5	10.1152/ajpheart.00065.2004	11
1		1	0	1	0		Aebersold R	2003	...	NATURE	422	198	4.5	10.1038/nature01511	63
2		4	0	1	0		Burr SP	2016	...	CELL METAB	24	740	3.5	10.1016/j.cmet.2016.09.015	4
5		13	0.07	1	0		Fraser J	2006	...	P NATL ACAD SCI USA	103	2977	4.5	10.1073/pnas.0508270103	1
1		4	0	1	0		Deplano M	1989	...	DIS AQUAT ORGAN	6	121	4.5	10.3354/dao006121	17
6		21	0	1	0		Ferreira CEL	2015	...	PLOS ONE	10	0	3.5	10.1371/journal.pone.0123002	3
2		1	0	1	0		Al-awady MJ	2015	...	RSC ADV	5	37044	4.5	10.1039/c5ra05577f	35
3		6	0	1	0		Shao CW	2014	...	GENOME RES	24	604	2.5	10.1101/gr.162172.113	5
1		0	0	1	0		Arai T	2003	...	P NATL ACAD SCI USA	100	9855	4.5	10.1073/pnas.1733908100	91
1		3	0	1	0		Gibbs AG	1999	...	J EXP BIOL	202	2709	1.5		10
2		0	0	1	0		Bonkowsky JL	2018	...	DIS MODEL MECH	11	0	1.5	10.1242/dmm.037127	92
3		7	0	1	0		Li Z	2015	...	BIOSENS BIOELECTRON	63	112	4.5	10.1016/j.bios.2014.07.024	23
1		3	0	1	0		Akkanen J	2004	...	AQUAT SCI	66	171	1.5	10.1007/s00027-004-0705-x	42
2		6	0	1	0		Burmester T	2009	...	J EXP BIOL	212	1423	1.5	10.1242/jeb.000729	1
1		7	0	1	0		Furthauer M	2001	...	DEVELOPMENT	128	2175	0.5		2
1		6	0	1	0		Bisgard GE	2000	...	RESP PHYSIOL	121	237	3.5	10.1016/S0034-5687(00)00131-6	10
2		4	0	1	0		Fang L	2014	...	BRIT J NUTR	111	808	3.5	10.1017/S0007114513003243	6
2		2	0	1	0		Craig PM	2018	...	COMP BIOCHEM PHYS B	224	156	0.5	10.1016/j.cbpb.2017.11.001	5
3		1	0	1	0		Ellett F	2011	...	BLOOD	117	0	3.5	10.1182/blood-2010-10-314120	67
2		1	0	1	0		Korwin-kossakowski M	2012	...	REV FISH BIOL FISHER	22	225	2.5	10.1007/s11160-011-9233-7	5
2		7	0	1	0		Basu N	2002	...	GENE	295	173	3.5	10.1016/S0378-1119(02)00687-X	22
1		6	0	1	0		Firtsche R	1996	...	AM J PHYSIOL	271	0	2.5		27
1		2	0	1	0		Aherne D	2008	...	ADV FUNCT MATER	18	2005	4.5	10.1002/adfm.200800233	21
2		4	0	1	0		Lock ER	2016	...	AQUACULT NUTR	22	1202	1.5	10.1111/anu.12343	37
2		9	0	1	0		Mitrovic D	2009	...	J EXP BIOL	212	843	0.5	10.1242/jeb.025999	1
2		1	0	1	0		Gemberling M	2013	...	TRENDS GENET	29	611	4.5	10.1016/j.tig.2013.07.003	13
1		9	0	1	0		Carazo-salas RE	2001	...	NAT CELL BIOL	3	228	1.5	10.1038/35060009	2
2		3	0	1	0		Lee KJ	2007	...	ACS NANO	1	133	4.5	10.1021/nn700048y	40
2		0	0	1	0		Lee HC	2021	...	EMBO J	40	0	0.5	10.15252/embj.2019104123	93
2		6	0	1	0		Lucitt MB	2008	...	MOL CELL PROTEOMICS	7	981	0.5	10.1074/mcp.M700382-MCP200	1
1		9	0	1	0		Albins MA	2012	...	MAR ECOL PROG SER	448	1	-0.5	10.3354/meps09580	3
2		0	0	1	0		Busquet F	2014	...	REGUL TOXICOL PHARM	69	496	4.5	10.1016/j.yrtph.2014.05.018	94
2		4	0	1	0		Brown DR	2016	...	NEUROTOXICOL TERATOL	53	55	0.5	10.1016/j.ntt.2015.10.007	8
2		8	0	1	0		Rimoldi S	2012	...	MOL BIOL REP	39	4009	0.5	10.1007/s11033-011-1181-8	0
2		3	0	1	0		Galli GLJ	2014	...	J COMP PHYSIOL B	184	285	4.5	10.1007/s00360-014-0806-3	5
2		3	0	1	0		Asharani PV	2009	...	ACS NANO	3	279	2.5	10.1021/nn800596w	40
2		2	0	1	0		Daulatzai MA	2017	...	J NEUROSCI RES	95	943	2.5	10.1002/jnr.23777	4
2		10	0	1	0		Mitchell GS	2003	...	J APPL PHYSIOL	94	358	2.5	10.1152/japplphysiol.00523.2002	11
1		6	0	1	0		Dewilde S	2001	...	J BIOL CHEM	276	38949	2.5	10.1074/jbc.M106438200	9
2		3	0	1	0		Jensen LD	2015	...	P NATL ACAD SCI USA	112	0	2.5	10.1073/pnas.1510245112	26
2		6	0	1	0		Tay TL	2006	...	PROTEOMICS	6	3176	2.5	10.1002/pmic.200600030	1
2		5	0	1	0		Nicoli S	2010	...	NATURE	464	1196	2.5	10.1038/nature08889	0
3		4	0	1	0		Nurse CA	2010	...	EXP PHYSIOL	95	657	4.5	10.1113/expphysiol.2009.049312	5
3		7	0.01	1	0		Wu YC	2015	...	PLOS ONE	10	0	2.5	10.1371/journal.pone.0126750	13
2		1	0	1	0		Li XY	2019	...	ANAL CHEM	91	11409	1.5	10.1021/acs.analchem.9b02782	4
2		4	0	1	0		Buckley DL	2012	...	J AM CHEM SOC	134	4465	3.5	10.1021/ja209924v	0
2		10	0	1	0		Johnston MW	2012	...	AQUAT INVASIONS	7	405	2.5	10.3391/ai.2012.7.3.011	3
2		3	0	1	0		Anttila K	2013	...	J EXP BIOL	216	1183	3.5	10.1242/jeb.080556	5
2		7	0	1	0		Andradi-brown DA	2017	...	ROY SOC OPEN SCI	4	0	1.5	10.1098/rsos.170027	3
1		3	0	1	0		Carpentier G	2007	...	STACK TIMELAPSE ARRO	0	0	-0.5		11
1		6	0	1	0		Burggren WW	1994	...	CARDIOSCIENCE	5	183	4.5		27
3		5	0.06	1	0		Metelo AM	2015	...	J CLIN INVEST	125	1987	0.5	10.1172/JCI73665	0
3		4	0	1	0		Bianchini K	2013	...	J EXP BIOL	216	4415	3.5	10.1242/jeb.083337	5
1		9	0	1	0		Blagosklonny MV	2001	...	INT J ONCOL	19	257	3.5		2
1		7	0	1	0		Eisen JS	1996	...	CELL	87	969	2.5	10.1016/S0092-8674(00)81792-4	24
2		4	0	1	0		Di GIULIORT	2015	...	J TOXICOL ENV HEAL B	18	259	1.5	10.1080/15320383.2015.1074841	8
6		6	0	1	0		Nilsson GE	2012	...	NAT CLIM CHANGE	2	201	4.5		30
2		3	0	1	0		Chen XQ	2016	...	CHEM SOC REV	45	2976	1.5	10.1039/c6cs00192k	13
2		5	0.01	1	0		Bahary N	2007	...	BLOOD	110	3627	4.5	10.1182/blood-2006-04-016378	0
2		4	0	1	0		Cripps IL	2011	...	PLOS ONE	6	0	2.5	10.1371/journal.pone.0022736	38
3		11	0	1	0		Shen RJ	2010	...	COMP BIOCHEM PHYS B	157	273	2.5	10.1016/j.cbpb.2010.06.013	0
2		4	0	1	0		Ikert H	2020	...	COMP BIOCHEM PHYS D	33	0	0.5	10.1016/j.cbd.2019.100634	6
1		0	0	1	0		Andersson TPM	2003	...	CELL SIGNAL	15	1119	4.5	10.1016/S0898-6568(03)00111-6	95
1		5	0	1	0		*fbma	2008	...	CHIN FISH YB	0	0	2.5		1
1		3	0	1	0		Bever MM	2002	...	DEV DYNAM	223	536	4.5	10.1002/dvdy.10062	2
2		5	0	1	0		Horng JL	2007	...	AM J PHYSIOL-REG I	292	0	3.5	10.1152/ajpregu.00578.2006	1
2		3	0	1	0		Nik SHM	2011	...	EXP CELL RES	317	1503	2.5	10.1016/j.yexcr.2011.04.004	41
4		9	0	1	0		Elks PM	2011	...	BLOOD	118	712	1.5	10.1182/blood-2010-12-324186	0
1		3	0	1	0		Agencia NACIONALDEVIGILANCIASANITARIA(ANVISA)	2019	...	IND MON	0	0	2.5		43
4		3	0	1	0		Holmstrup M	2010	...	SCI TOTAL ENVIRON	408	3746	4.5	10.1016/j.scitotenv.2009.10.067	28
2		3	0	1	0		Bar-ilan O	2009	...	SMALL	5	1897	2.5	10.1002/smll.200801716	40
2		0	0	1	0		Chablais F	2011	...	BMC DEV BIOL	11	0	1.5	10.1186/1471-213X-11-21	96
1		0	0	1	0		*usdh	2007	...	150 USDH HSFDACVM US	0	0	3.5		97
4		7	0.13	1	0		R CORETEAM	2017	...	R LANG ENV STAT COMP	0	0	1.5		8
1		7	0	1	0		Clegg JS	1997	...	J EXP BIOL	200	467	3.5		10
1		2	0	1	0		Arikkath J	2003	...	CURR OPIN NEUROBIOL	13	298	4.5	10.1016/S0959-4388(03)00066-7	2
1		6	0	1	0		Bradley SR	2002	...	NAT NEUROSCI	5	401	0.5	10.1038/nn848	10
2		1	0	1	0		Kang YF	2015	...	SCI REP-UK	5	0	2.5	10.1038/srep11835	13
2		3	0	1	0		Zhang L	2011	...	J EXP BIOL	214	2678	2.5	10.1242/jeb.055541	5
2		6	0	1	0		Nicoli S	2007	...	NAT PROTOC	2	2918	1.5	10.1038/nprot.2007.412	12
2		3	0	1	0		Eijkelenboom A	2013	...	NAT REV MOL CELL BIO	14	83	2.5	10.1038/nrm3507	0
2		0	0	1	0		Cheng JP	2007	...	ENVIRON TOXICOL CHEM	26	708	4.5	10.1897/06-272R.1	98
2		3	0	1	0		Jain IH	2016	...	SCIENCE	352	54	2.5	10.1126/science.aad9642	5
3		4	0	1	0		Jutfelt F	2018	...	J EXP BIOL	221	0	1.5	10.1242/jeb.169615	4
3		4	0.01	1	0		Rytkonen KT	2013	...	EVOLUTION	67	873	3.5	10.1111/j.1558-5646.2012.01820.x	8
4		7	0.08	1	0		Beaman JE	2016	...	TRENDS ECOL EVOL	31	237	4.5	10.1016/j.tree.2016.01.004	6
2		1	0	1	0		Huang YQ	2012	...	ENVIRON INT	42	91	2.5	10.1016/j.envint.2011.04.010	5
2		0	0	1	0		Cotter K	2015	...	TRENDS BIOCHEM SCI	40	611	4.5	10.1016/j.tibs.2015.08.005	99
1		7	0	1	0		**oecd(organisationforeconomiccooperationanddevelo	2004	...	OECD GUID TEST CHEM	0	0	4.5		14
3		6	0.02	1	0		Semenza GL	2014	...	ANNU REV PATHOL-MECH	9	47	2.5	10.1146/annurev-pathol-012513-104720	8
2		7	0	1	0		Li XH	2014	...	CHEM REV	114	590	3.5	10.1021/cr300508p	13
2		0	0	1	0		Levitte S	2016	...	CELL HOST MICROBE	20	250	4.5	10.1016/j.chom.2016.07.007	100
1		6	0	1	0		Brouns I	2000	...	AM J RESP CELL MOL	23	52	2.5	10.1165/ajrcmb.23.1.3936	10
1		0	0	1	0		Afgan E	2018	...	NUCLEIC ACIDS RES	46	0	3.5	10.1093/nar/gky379	101
1		9	0	1	0		Adjei AA	2001	...	JNCI-J NATL CANCER I	93	1062	3.5	10.1093/jnci/93.14.1062	2
2		3	0	1	0		Mandic M	2021	...	J EXP BIOL	224	0	0.5	10.1242/jeb.231936	4
2		5	0	1	0		Cho SW	2013	...	GENETICS	195	1177	4.5	10.1534/genetics.113.155853	31
5		2	0	1	0		Best C	2018	...	COMP BIOCHEM PHYS B	224	210	1.5	10.1016/j.cbpb.2018.01.006	19
1		5	0	1	0		Gielen JLW	2002	...	B MATH BIOL	64	175	0.5	10.1006/bulm.2001.0275	9
2		1	0	1	0		Dehler CE	2017	...	AQUACULTURE	467	149	2.5	10.1016/j.aquaculture.2016.07.017	35
3		5	0	1	0		Forth HP	2017	...	ENVIRON TOXICOL CHEM	36	1450	2.5	10.1002/etc.3672	19
2		0	0	1	0		Nasevicius A	2000	...	NAT GENET	26	216	1.5	10.1038/79951	102
2		9	0	1	0		Fogg AQ	2017	...	B MAR SCI	93	791	2.5	10.5343/bms.2016.1095	3
2		9	0	1	0		Cao FJ	2018	...	AQUAT TOXICOL	198	129	2.5	10.1016/j.aquatox.2018.02.023	6
1		6	0	1	0		Brownlie A	2003	...	DEV BIOL	255	48	3.5	10.1016/S0012-1606(02)00041-6	11
2		8	0	1	0		Ge RL	2013	...	NAT COMMUN	4	0	1.5	10.1038/ncomms2860	15
2		6	0.01	1	0		Obrien KM	2011	...	J EXP BIOL	214	275	2.5	10.1242/jeb.046854	0
1		1	0	1	0		@phasekumar V,2018,RHIZOREMEDIATIONAZO,V0,PP253,DO	1000	...	LENS	0	0	1021.5		65
2		3	0	1	0		Chan YC	2012	...	MICROCIRCULATION	19	215	4.5	10.1111/j.1549-8719.2011.00154.x	0
1		4	0	1	0		Dabrowski K	1990	...	AQUACULTURE	84	61	3.5	10.1016/0044-8486(90)90300-C	17
2		3	0.01	1	0		Koboldt DC	2012	...	NATURE	490	61	2.5	10.1038/nature11412	39
1		4	0	1	0		Steinberg CEW	1992	...	ACTA HYDROCH HYDROB	20	326	2.5		16
5		10	0.01	1	0		Brette F	2014	...	SCIENCE	343	772	4.5	10.1126/science.1242747	8
2		7	0	1	0		Adams LK	2006	...	WATER RES	40	3527	2.5	10.1016/j.watres.2006.08.004	14
2		3	0	1	0		Lyu LK	2018	...	SCI REP-UK	8	0	2.5	10.1038/s41598-018-27013-z	6
2		6	0	1	0		de Jong JLO	2005	...	ANNU REV GENET	39	481	3.5	10.1146/annurev.genet.39.073003.095931	1
3		3	0	1	0		Sundin L	2002	...	J EXP ZOOL	293	232	3.5	10.1002/jez.10130	11
4		13	0.01	1	0		Schmidt M	2003	...	J BIOL CHEM	278	1932	4.5	10.1074/jbc.M209909200	9
2		5	0	1	0		Belair CD	2001	...	DEV DYNAM	222	581	2.5	10.1002/dvdy.1213	7
3		7	0	1	0		Feng P	2016	...	ANAL CHEM	88	5610	3.5	10.1021/acs.analchem.6b01160	23
2		2	0	1	0		Elks PM	2014	...	PLOS ONE	9	0	4.5	10.1371/journal.pone.0100928	58
1		7	0	1	0		Draper BW	2001	...	GENESIS	30	154	0.5	10.1002/gene.1053	25
1		1	0	1	0		Blazer VS	2002	...	FISH PHYSIOL BIOCHEM	26	85	4.5	10.1023/A:1023332216713	73
3		7	0	1	0		Zhang J	2015	...	ANAL CHEM	87	11832	4.5	10.1021/acs.analchem.5b03336	23
3		6	0	1	0		Tzaneva V	2011	...	AM J PHYSIOL-REG I	300	0	4.5	10.1152/ajpregu.00530.2010	5
2		3	0	1	0		Henry TR	1997	...	TOXICOL APPL PHARM	142	56	1.5	10.1006/taap.1996.8024	7
2		5	0	1	0		Braun MH	2009	...	J EXP BIOL	212	3846	0.5	10.1242/jeb.034157	1
2		4	0	1	0		Chen H	2015	...	J MAR BIOL ASSOC UK	95	661	3.5	10.1017/S0025315414001568	36
2		1	0	1	0		Shih TH	2012	...	AM J PHYSIOL-REG I	302	0	0.5	10.1152/ajpregu.00318.2011	66
2		2	0	1	0		Bohme S	2017	...	ENVIRON SCI-NANO	4	1005	0.5	10.1039/c6en00440g	13
1		7	0	1	0		Blomqvist AG	1997	...	TRENDS NEUROSCI	20	294	1.5	10.1016/S0166-2236(96)01057-0	24
2		5	0	1	0		Zou SM	2009	...	PLOS ONE	4	0	1.5	10.1371/journal.pone.0007026	1
2		3	0	1	0		Chen Z	2014	...	MOL CELL BIOL	34	1085	1.5	10.1128/MCB.00718-13	0
1		3	0	1	0		Akkanen J	2001	...	CHEMOSPHERE	45	453	4.5	10.1016/S0045-6535(01)00038-8	42
1		6	0	1	0		Akbarzadeh A	2011	...	COMP BIOCHEM PHYS B	158	282	1.5	10.1016/j.cbpb.2010.12.005	0
2		6	0	1	0		Schaefer J	2006	...	J FISH BIOL	69	722	3.5	10.1111/j.1095-8649.2006.01145.x	1
2		5	0	1	0		Rankin EB	2008	...	CELL DEATH DIFFER	15	678	3.5	10.1038/cdd.2008.21	0
2		5	0	1	0		Jao LE	2013	...	P NATL ACAD SCI USA	110	13904	4.5	10.1073/pnas.1308335110	31
3		5	0.01	1	0		Cutz E	2013	...	SEMIN CELL DEV BIOL	24	40	3.5	10.1016/j.semcdb.2012.09.003	5
2		2	0	1	0		Tracy K	2007	...	MOL CELL BIOL	27	6229	3.5	10.1128/MCB.02246-06	12
4		6	0	1	0		Fent K	2015	...	ENVIRON INT	84	115	2.5	10.1016/j.envint.2015.06.012	13
1		7	0	1	0		Darlison MG	1997	...	P NATL ACAD SCI USA	94	8214	1.5	10.1073/pnas.94.15.8214	24
3		4	0	1	0		Runnalls TJ	2013	...	ENVIRON SCI TECHNOL	47	2077	4.5	10.1021/es3048834	13
2		2	0	1	0		Bischel LL	2013	...	LAB CHIP	13	1732	1.5	10.1039/c3lc50099c	0
3		2	0	1	0		Puente BN	2014	...	CELL	157	565	2.5	10.1016/j.cell.2014.03.032	59
1		4	0.02	1	0		Detrich HW	1999	...	METHODS CELL BIOL	59	3	1.5	10.1016/S0091-679X(08)61816-6	10
4		9	0	1	0		Jonz MG	2003	...	J COMP NEUROL	461	1	2.5	10.1002/cne.10680	11
2		7	0	1	0		Straus C	2001	...	CAN J PHYSIOL PHARM	79	959	4.5	10.1139/cjpp-79-11-959	11
3		7	0	1	0		Huang DW	2009	...	NAT PROTOC	4	44	4.5	10.1038/nprot.2008.211	0
1		9	0	1	0		Chery N	1999	...	J NEUROSCI	19	7342	0.5	10.1523/JNEUROSCI.19-17-07342.1999	18
2		2	0	1	0		Bray NL	2016	...	NAT BIOTECHNOL	34	888	2.5	10.1038/nbt0816-888d	8
1		4	0	1	0		Armstrong EJ	2004	...	CIRC RES	95	459	3.5	10.1161/01.RES.0000141146.95728.da	2
1		7	0	1	0		Baker K	1997	...	P NATL ACAD SCI USA	94	4554	3.5	10.1073/pnas.94.9.4554	10
1		5	0	1	0		Chiral M	2004	...	PEDIATR RES	56	775	0.5	10.1203/01.PDR.0000142732.09325.61	22
1		7	0	1	0		Giannini AL	2000	...	J BIOL CHEM	275	21883	1.5	10.1074/jbc.M001929200	2
1		3	0	1	0		**internationalagencyforresearchoncancer-iarc	2017	...	SOM ORG INS HERB	0	0	4.5		43
1		0	0	1	0		Ahamed M	2008	...	TOXICOL APPL PHARM	233	404	2.5	10.1016/j.taap.2008.09.015	103
3		7	0	1	0		Ritz C	2015	...	PLOS ONE	10	0	4.5	10.1371/journal.pone.0146021	4
3		9	0	1	0		Grabherr MG	2011	...	NAT BIOTECHNOL	29	644	3.5	10.1038/nbt.1883	15
1		7	0	1	0		Balasubramaniam A	1994	...	J MED CHEM	37	811	4.5	10.1021/jm00032a015	24
2		5	0	1	0		Trede NS	2004	...	IMMUNITY	20	367	3.5	10.1016/S1074-7613(04)00084-6	14
2		8	0	1	0		Liang D	2001	...	MECH DEVELOP	108	29	1.5	10.1016/S0925-4773(01)00468-3	9
2		3	0	1	0		Noyes PD	2009	...	ENVIRON INT	35	971	3.5	10.1016/j.envint.2009.02.006	28
2		4	0	1	0		Henry M	2015	...	ANIM FEED SCI TECH	203	1	2.5	10.1016/j.anifeedsci.2015.03.001	37
1		6	0	1	0		Adorno M	2009	...	CELL	137	87	-0.5	10.1016/j.cell.2009.01.039	12
1		4	0	1	0		Fenwick JC	1999	...	J EXP BIOL	202	3659	4.5		10
2		7	0	1	0		Gress E	2017	...	PEERJ	5	0	1.5	10.7717/peerj.3683	3
1		1	0	1	0		*eur COMM	1995	...	ASS POT RISKS ENV PO	0	0	3.5		69
4		5	0	1	0		Zachar PC	2017	...	J NEUROPHYSIOL	118	3014	3.5	10.1152/jn.00237.2017	4
2		5	0	1	0		Prasch AL	2004	...	TOXICOL SCI	78	68	3.5	10.1093/toxsci/kfh053	2
2		8	0	1	0		Li Y	2014	...	MOL BIOL EVOL	31	1200	0.5	10.1093/molbev/msu070	15
1		4	0	1	0		Anselmi M	2007	...	BIOPHYS J	93	434	0.5	10.1529/biophysj.106.099648	9
1		9	0	1	0		Bunn HF	1998	...	J EXP BIOL	201	1197	1.5		7
1		2	0	1	0		*presens INC	2008	...	INSTR MAN SDR SENSOR	0	0	2.5		44
2		7	0	1	0		Bejarano I	2014	...	CORAL REEFS	33	313	4.5	10.1007/s00338-014-1125-6	3
2		7	0	1	0		Jurczyk A	2011	...	GEN COMP ENDOCR	170	334	1.5	10.1016/j.ygcen.2010.10.010	0
1		8	0	1	0		Gale NW	2001	...	DEV BIOL	230	151	-0.5	10.1006/dbio.2000.0112	20
2		2	0	1	0		Coolidge EH	2008	...	J EXP BIOL	211	1231	4.5	10.1242/jeb.015248	5
1		5	0	1	0		Greene MW	1997	...	MOL MAR BIOL BIOTECH	6	144	4.5		2
1		7	0	1	0		Bavis RW	2004	...	J PHYSIOL-LONDON	557	645	1.5	10.1113/jphysiol.2004.061408	11
2		7	0	1	0		Cao J	2016	...	ANAL CHEM	88	4995	3.5	10.1021/acs.analchem.6b01096	23
2		3	0	1	0		Karra R	2015	...	P NATL ACAD SCI USA	112	13255	2.5	10.1073/pnas.1511209112	26
1		8	0	1	0		@phasedubansky B,2018,DEVENV,V0,PP9,DOI101007/978-	1000	...	LENS	0	0	1021.5		4
2		0	0	1	0		Gagne F	2012	...	CHEMOSPHERE	89	615	3.5	10.1016/j.chemosphere.2012.05.063	104
2		3	0	1	0		Lohr H	2011	...	ANNU REV PHYSIOL	73	183	1.5	10.1146/annurev-physiol-012110-142320	0
1		9	0	1	0		Buss RR	1999	...	NEUR ABSTR	25	1151	0.5		18
2		4	0	1	0		Aspatwar A	2017	...	J ENZYM INHIB MED CH	32	832	2.5	10.1080/14756366.2017.1332056	4
2		6	0	1	0		Oberdorster E	2004	...	ENVIRON HEALTH PERSP	112	1058	3.5	10.1289/ehp.7021	14
2		7	0	1	0		Lin VS	2015	...	CHEM SOC REV	44	4596	2.5	10.1039/c4cs00298a	13
2		9	0.01	1	0		Bickler PE	2007	...	ANNU REV PHYSIOL	69	145	1.5	10.1146/annurev.physiol.69.031905.162529	1
1		6	0	1	0		Chen JAU-NIAN	1997	...	P7	0	0	1.5		27
2		16	0.01	1	0		Barrans JD	2001	...	BIOCHEM BIOPH RES CO	280	964	1.5	10.1006/bbrc.2000.4137	2
1		7	0	1	0		Freiburg A	2000	...	CIRC RES	86	1114	1.5		25
2		2	0	1	0		Harris JM	2013	...	BLOOD	121	2483	2.5	10.1182/blood-2012-12-471201	0
2		1	0	1	0		Kettleborough RNW	2013	...	NATURE	496	494	1.5	10.1038/nature11992	67
2		5	0	1	0		Andreasen EA	2002	...	MOL PHARMACOL	62	234	1.5	10.1124/mol.62.2.234	7
2		2	0	1	0		Das T	2019	...	NEUROSCI LETT	712	0	2.5	10.1016/j.neulet.2019.134492	4
2		10	0	1	0		Johnston MW	2013	...	PLOS ONE	8	0	1.5	10.1371/journal.pone.0073023	3
1		8	0	1	0		@phaseesbaugh AJ,2018,DEVENV,V0,PP203,DOI101007/97	1000	...	LENS	0	0	1021.5		4
3		4	0	1	0		Huang CX	2015	...	FASEB J	29	4901	1.5	10.1096/fj.14-267104	0
2		4	0	1	0		Holcombe A	2013	...	PLOS ONE	8	0	0.5	10.1371/journal.pone.0063319	38
1		6	0	1	0		Gardner LB	2001	...	J BIOL CHEM	276	7919	-0.5	10.1074/jbc.M010189200	10
2		10	0	1	0		Peffy SF	2002	...	J EXP BIOL	205	3357	3.5		11
2		6	0	1	0		Campanucci VA	2003	...	J PHYSIOL-LONDON	548	731	1.5	10.1113/jphysiol.2002.035998	10
2		11	0.01	1	0		Idda ML	2012	...	PROG BRAIN RES	199	41	2.5	10.1016/B978-0-444-59427-3.00003-4	0
1		3	0	1	0		Baganz D	2004	...	ENVIRON TOXICOL	19	564	1.5	10.1002/tox.20063	42
1		6	0	1	0		Claiborne JB	2002	...	J EXP ZOOL	293	302	1.5	10.1002/jez.10125	9
2		4	0	1	0		Kemp PJ	2006	...	EXP PHYSIOL	91	829	1.5	10.1113/expphysiol.2006.034587	2
6		20	0.09	1	0		Dahl KA	2014	...	PLOS ONE	9	0	4.5	10.1371/journal.pone.0105852	3
2		3	0	1	0		Miller SC	2008	...	CAN J FISH AQUAT SCI	65	2170	2.5	10.1139/F08-123	1
2		6	0	1	0		Harrison MRM	2015	...	DEV CELL	33	442	2.5	10.1016/j.devcel.2015.04.001	26
3		4	0.01	1	0		Manchenkov T	2015	...	G3-GENES GENOM GENET	5	1107	1.5	10.1534/g3.115.018010	8
1		3	0	1	0		Bartholow JM	2005	...	N AM J FISH MANAGE	25	152	1.5	10.1577/M04-007.1	45
1		4	0	1	0		Navarre O	1989	...	AQUACULTURE	79	207	4.5	10.1016/0044-8486(89)90462-6	17
1		4	0	1	0		Griffiths PA	1999	...	J HOSP INFECT	41	111	0.5	10.1016/S0195-6701(99)90048-8	33
2		5	0	1	0		Flogel U	2004	...	FASEB J	18	1156	4.5	10.1096/fj.03-1382fje	1
1		3	0	1	0		Chen WY	2002	...	BIOCHEM BIOPH RES CO	291	798	4.5	10.1006/bbrc.2002.6517	2
2		6	0	1	0		Takeda N	2010	...	GENE DEV	24	491	2.5	10.1101/gad.1881410	0
2		6	0	1	0		Campos C	2012	...	GENE	500	93	4.5	10.1016/j.gene.2012.03.041	5
2		5	0	1	0		Husken U	2013	...	MECH DEVELOP	130	330	2.5	10.1016/j.mod.2012.09.002	0
1		2	0	1	0		*bfg	2009	...	P S HELD NOV 13 14 2	0	0	1.5		44
1		1	0	1	0		Anastasiadi D	2017	...	SCI REP-UK	7	0	4.5	10.1038/s41598-017-10861-6	46
5		11	0	1	0		Jonz MG	2004	...	J PHYSIOL-LONDON	560	737	1.5	10.1113/jphysiol.2004.069294	11
2		1	0	1	0		Colwill RM	2011	...	REV NEUROSCIENCE	22	63	4.5	10.1515/RNS.2011.008	5
2		1	0	1	0		Gobler CJ	2016	...	BIOL LETTERS	12	0	2.5	10.1098/rsbl.2015.0976	64
2		7	0	1	0		Wakasugi K	2003	...	J BIOL CHEM	278	36505	4.5	10.1074/jbc.M305519200	9
1		5	0	1	0		Gerull B	2002	...	NAT GENET	30	201	-0.5	10.1038/ng815	25
3		2	0	1	0		Yambire KF	2019	...	ELIFE	8	0	1.5	10.7554/eLife.51031	6
1		1	0	1	0		Appelhoff RJ	2004	...	J BIOL CHEM	279	38458	2.5	10.1074/jbc.M406026200	60
5		10	0.01	1	0		Tang RY	2007	...	ACTA BIOCH BIOPH SIN	39	384	3.5	10.1111/j.1745-7270.2007.00283.x	1
2		5	0	1	0		Liang XQ	2015	...	J BIOTECHNOL	208	44	2.5	10.1016/j.jbiotec.2015.04.024	31
2		1	0	1	0		Ale A	2018	...	ECOL INDIC	93	1190	2.5	10.1016/j.ecolind.2018.06.023	6
2		6	0	1	0		Brunori M	2005	...	P NATL ACAD SCI USA	102	8483	0.5	10.1073/pnas.0408766102	9
1		3	0	1	0		Antkiewicz DS	2005	...	TOXICOL SCI	84	368	2.5	10.1093/toxsci/kfi073	2
3		3	0	1	0		Diaz RJ	2008	...	SCIENCE	321	926	4.5	10.1126/science.1156401	0
2		0	0	1	0		Kishi S	2009	...	GERONTOLOGY	55	430	3.5	10.1159/000228892	105
1		2	0	1	0		Braun MH	2001	...	THESIS U BRIT COLUMB	0	0	3.5		53
1		7	0	1	0		Fragoso NM	1997	...	P 18 ANN M SOC ENV T	0	16	1.5		7
3		1	0	1	0		George S	2014	...	ENVIRON SCI TECHNOL	48	6374	1.5	10.1021/es405768n	71
1		3	0	1	0		Cantrell SM	1996	...	TOXICOL APPL PHARM	141	23	2.5		7
4		4	0.02	1	0		Fleming CR	2011	...	ECOTOXICOLOGY	20	1300	4.5	10.1007/s10646-011-0686-1	0
2		2	0	1	0		Beyer J	2016	...	MAR POLLUT BULL	110	28	3.5	10.1016/j.marpolbul.2016.06.027	19
3		13	0	1	0		Munoz RC	2011	...	MAR ECOL PROG SER	432	181	4.5	10.3354/meps09154	3
3		18	0	1	0		Ahrenholz DW	2010	...	ENVIRON BIOL FISH	88	305	4.5	10.1007/s10641-010-9647-4	3
2		6	0	1	0		Marques IJ	2008	...	J COMP PHYSIOL B	178	77	4.5	10.1007/s00360-007-0201-4	0
1		9	0	1	0		Del GIACCOL	2000	...	DEV GENES EVOL	210	41	1.5	10.1007/PL00008187	2
2		5	0	1	0		Rees BB	2009	...	COMP BIOCHEM PHYS A	154	70	0.5	10.1016/j.cbpa.2009.05.001	1
2		4	0	1	0		Madeira D	2013	...	COMP BIOCHEM PHYS A	166	237	4.5	10.1016/j.cbpa.2013.06.008	6
2		8	0	1	0		Saltys HA	2006	...	CELL TISSUE RES	323	1	3.5	10.1007/s00441-005-0048-5	1
2		7	0	1	0		Kozomara A	2011	...	NUCLEIC ACIDS RES	39	0	2.5	10.1093/nar/gkq1027	0
2		7	0	1	0		Shaw BJ	2011	...	ENVIRON INT	37	1083	1.5	10.1016/j.envint.2011.03.009	21
3		2	0	1	0		Beis D	2005	...	DEVELOPMENT	132	4193	4.5	10.1242/dev.01970	12
1		8	0	1	0		Burnison BK	1996	...	ENVIRON TOXICOL CHEM	15	1524	2.5	10.1002/etc.5620150915	7
2		9	0	1	0		Wei JW	2004	...	CANCER CELL	5	477	4.5	10.1016/S1535-6108(04)00116-3	12
2		0	0	1	0		Bai W	2010	...	J NANOPART RES	12	1645	4.5	10.1007/s11051-009-9740-9	106
2		4	0	1	0		Lahiri S	2006	...	PROG BIOPHYS MOL BIO	91	249	1.5	10.1016/j.pbiomolbio.2005.07.001	2
1		5	0	1	0		Boone AN	2002	...	COMP BIOCHEM PHYS C	132	223	2.5	10.1016/S1532-0456(02)00066-2	22
1		5	0	1	0		Fu XW	2002	...	J PHYSIOL-LONDON	539	503	0.5	10.1113/jphysiol.2001.013071	10
5		17	0.02	1	0		Sollid J	2006	...	RESP PHYSIOL NEUROBI	154	241	4.5	10.1016/j.resp.2006.02.006	1
2		4	0	1	0		Intergovernmental PANELONCLIMATECHANGE(IPCC)	2018	...	GLOBAL WARMING 15 C	0	0	0.5		8
2		1	0	1	0		Kanatous SB	2010	...	J EXP BIOL	213	2741	3.5	10.1242/jeb.041442	68
1		4	0	1	0		Lee SK	1993	...	WATER RES	27	199	1.5	10.1016/0043-1354(93)90076-T	16
1		9	0	1	0		Chub N	1998	...	J NEUROSCI	18	294	1.5		18
6		13	0	1	0		Mandic M	2020	...	P ROY SOC B-BIOL SCI	287	0	0.5	10.1098/rspb.2020.0798	4
1		9	0	1	0		Ali DW	2000	...	J NEUROPHYSIOL	83	181	-0.5	10.1152/jn.2000.83.1.181	18
2		3	0	1	0		Gerlinger M	2012	...	NEW ENGL J MED	366	883	2.5	10.1056/NEJMoa1113205	39
2		4	0	1	0		Bigham AW	2014	...	GENE DEV	28	2189	2.5	10.1101/gad.250167.114	0
1		1	0	1	0		Abraham E	2009	...	GEN COMP ENDOCR	164	151	3.5	10.1016/j.ygcen.2009.01.012	28
6		3	0.01	1	0		Lopez-olmeda JF	2011	...	J THERM BIOL	36	91	2.5	10.1016/j.jtherbio.2010.12.005	28
2		4	0	1	0		Gu J	2015	...	SCI REP-UK	5	0	0.5	10.1038/srep09836	29
2		6	0	1	0		Han J	2014	...	AQUAT TOXICOL	150	66	3.5	10.1016/j.aquatox.2014.02.020	13
2		0	0	1	0		Choi TY	2021	...	EXP MOL MED	53	310	-0.5	10.1038/s12276-021-00571-5	107
1		9	0	1	0		Carver LA	1997	...	J BIOL CHEM	272	11452	2.5		7
3		4	0	1	0		Mager EM	2014	...	ENVIRON SCI TECHNOL	48	7053	2.5	10.1021/es501628k	8
2		6	0	1	0		Fuchs C	2004	...	J BIOL CHEM	279	24116	1.5	10.1074/jbc.M402011200	9
1		2	0	1	0		Akaboshi S	2009	...	AM J PATHOL	175	1675	1.5	10.2353/ajpath.2009.090069	1
1		1	0	1	0		*gmbh	2009	...	WASSERQUALITAT	0	0	1.5		44
1		8	0	1	0		Deftos ML	2000	...	CURR OPIN IMMUNOL	12	166	0.5	10.1016/S0952-7915(99)00067-9	20
1		3	0	1	0		*nmfs	2003	...	FED REGISTER	68	4433	3.5		45
2		11	0.02	1	0		Bauchat JR	2001	...	J ENDOCRINOL	170	619	3.5	10.1677/joe.0.1700619	2
2		11	0	1	0		Moore FRANCISCOB-G	2006	...	FRONT ZOOL	3	4	3.5	10.1186/1742-9994-3-4	1
2		2	0	1	0		Cheshenko K	2008	...	GEN COMP ENDOCR	155	31	2.5	10.1016/j.ygcen.2007.03.005	54
2		4	0	1	0		Altieri AH	2015	...	GLOBAL CHANGE BIOL	21	1395	1.5	10.1111/gcb.12754	5
1		8	0	1	0		Gerety SS	1999	...	MOL CELL	4	403	1.5	10.1016/S1097-2765(00)80342-1	20
2		3	0	1	0		Clements JC	2015	...	MAR ECOL PROG SER	536	259	1.5	10.3354/meps11426	30
3		1	0	1	0		Seebacher F	2016	...	J EXP BIOL	219	1625	2.5	10.1242/jeb.136689	5
1		0	0	1	0		Adams SL	2003	...	CRYOBIOLOGY	47	1	2.5	10.1016/S0011-2240(03)00063-4	108
1		3	0	1	0		Akkanen J	2003	...	ENVIRON TOXICOL CHEM	22	518	2.5	10.1002/etc.5620220308	42
1		2	0	1	0		Bass AH	2005	...	ALTERNATIVE REPROD T	0	0	-0.5		52
6		11	0	1	0		Milsom WK	2012	...	RESP PHYSIOL NEUROBI	184	326	3.5	10.1016/j.resp.2012.07.013	5
2		3	0	1	0		Kosmehl T	2006	...	ENVIRON TOXICOL CHEM	25	2097	4.5	10.1897/05-460R.1	44
2		4	0	1	0		Kim D	2013	...	GENOME BIOL	14	0	4.5	10.1186/gb-2013-14-4-r36	6
4		11	0.01	1	0		Jensen LD	2012	...	CELL REP	2	231	2.5	10.1016/j.celrep.2012.07.005	0
2		4	0	1	0		Vandesompele J	2002	...	GENOME BIOL	3	0	4.5	10.1186/gb-2002-3-7-research0034	34
1		7	0	1	0		Enan E	1998	...	TOXICOL APPL PHARM	151	283	0.5	10.1006/taap.1998.8470	7
1		7	0	1	0		Badorff C	1999	...	NAT MED	5	320	2.5	10.1038/6543	25
2		6	0	1	0		Mueller CA	2011	...	PHYSIOL BIOCHEM ZOOL	84	522	2.5	10.1086/661953	0
2		2	0	1	0		Yamashita MICHIAKI	2010	...	AQUA-BIOSCIENCE MONOGRAPHS	3	111	3.5	10.5047/absm.2010.00304.0111	49
2		3	0	1	0		Evans TG	2007	...	COMP BIOCHEM PHYS A	146	131	3.5	10.1016/j.cbpa.2006.09.023	1
2		3	0	1	0		Heuer RM	2014	...	AM J PHYSIOL-REG I	307	0	1.5	10.1152/ajpregu.00064.2014	30
2		6	0	1	0		Kumar P	2012	...	COMPR PHYSIOL	2	141	2.5	10.1002/cphy.c100069	5
1		7	0	1	0		Fragoso NM	1998	...	ENVIRON TOXICOL CHEM	17	2347	0.5	10.1002/etc.5620171127	7
3		3	0	1	0		Vettori A	2017	...	P NATL ACAD SCI USA	114	9948	3.5	10.1073/pnas.1705338114	4
2		5	0	1	0		Ordway GA	2004	...	J EXP BIOL	207	3441	4.5	10.1242/jeb.01172	1
1		2	0	1	0		Anderson KV	2000	...	CURR OPIN IMMUNOL	12	13	3.5	10.1016/S0952-7915(99)00045-X	55
2		1	0	1	0		Feil R	2012	...	NAT REV GENET	13	97	3.5	10.1038/nrg3142	29
1		4	0	1	0		Randic M	1990	...	J MATH CHEM	4	157	4.5	10.1007/BF01170011	16
2		12	0.02	1	0		Cantrell SM	1998	...	TOXICOL APPL PHARM	148	24	0.5	10.1006/taap.1997.8309	7
2		1	0	1	0		Wang XL	2009	...	AM J PHYSIOL-REG I	296	0	2.5	10.1152/ajpregu.90969.2008	0
2		1	0	1	0		Kanatous SB	2009	...	AM J PHYSIOL-CELL PH	296	0	4.5	10.1152/ajpcell.00428.2008	68
1		9	0	1	0		Angelo S	2000	...	MECH DEVELOP	95	231	1.5	10.1016/S0925-4773(00)00334-8	2
2		3	0	1	0		Gariano RF	2005	...	NATURE	438	960	4.5	10.1038/nature04482	12
2		3	0	1	0		Yu RMK	2008	...	AQUAT TOXICOL	90	235	2.5	10.1016/j.aquatox.2008.09.004	1
2		12	0	1	0		Morris JA	2009	...	ENVIRON BIOL FISH	86	389	2.5	10.1007/s10641-009-9538-8	3
3		13	0.1	1	0		Prabhakar NR	2012	...	PHYSIOL REV	92	967	2.5	10.1152/physrev.00030.2011	0
2		3	0	1	0		Guiney PD	1997	...	TOXICOL APPL PHARM	143	256	1.5	10.1006/taap.1996.8051	7
1		5	0	1	0		Ema M	1996	...	MOL CELL BIOL	16	5865	4.5		7
1		7	0	1	0		Fatkin D	1999	...	NEW ENGL J MED	341	1715	2.5	10.1056/NEJM199912023412302	25
1		9	0	1	0		Abesamis RA	2010	...	CORAL REEFS	29	911	1.5	10.1007/s00338-010-0653-y	3
1		2	0	1	0		Barrett T	2005	...	NUCLEIC ACIDS RES	33	0	1.5		34
2		6	0	1	0		Zhu SQ	2006	...	MAR ENVIRON RES	62	0	1.5	10.1016/j.marenvres.2006.04.059	14
2		15	0	1	0		Furlong EEM	2001	...	SCIENCE	293	1629	1.5	10.1126/science.1062660	2
3		7	0	1	0		Weger BD	2011	...	PLOS ONE	6	0	2.5	10.1371/journal.pone.0017080	0
1		6	0	1	0		Burmester T	2004	...	IN PRESS NEWS PHYSL	0	0	-0.5		9
2		12	0	1	0		Green SJ	2011	...	MAR ECOL PROG SER	433	159	0.5	10.3354/meps09208	3
1		1	0	1	0		Gartiser S	1996	...	ACTA HYDROCH HYDROB	24	90	2.5	10.1002/aheh.19960240206	69
2		3	0	1	0		Schwede T	2003	...	NUCLEIC ACIDS RES	31	3381	3.5	10.1093/nar/gkg520	34
2		4	0	1	0		Liu JW	2017	...	J EXP BIOL	220	3686	0.5	10.1242/jeb.161406	6
2		3	0	1	0		Yu RMK	2012	...	ENVIRON SCI TECHNOL	46	9112	1.5	10.1021/es301758c	0
1		10	0	1	0		Braunbeck T	1990	...	ARCH ENVIRON CON TOX	19	405	3.5	10.1007/BF01054986	17
1		5	0	1	0		Bears H	2006	...	AQUAT TOXICOL	77	257	-0.5	10.1016/j.aquatox.2005.12.008	32
2		12	0.03	1	0		Goncalves IFS	2020	...	ENVIRON SCI POLLUT R	27	10185	0.5	10.1007/s11356-020-07902-5	6
2		9	0	1	0		Jones FC	2012	...	NATURE	484	55	2.5	10.1038/nature10944	15
2		2	0	1	0		Porteus CS	2012	...	RESP PHYSIOL NEUROBI	184	316	1.5	10.1016/j.resp.2012.06.019	5
2		8	0	1	0		Hughes MC	2019	...	AM J PHYSIOL-REG I	316	0	1.5	10.1152/ajpregu.00315.2018	4
2		3	0	1	0		Mccurley AT	2008	...	BMC MOL BIOL	9	0	4.5	10.1186/1471-2199-9-102	0
4		13	0.02	1	0		Erler JT	2009	...	CANCER CELL	15	35	0.5	10.1016/j.ccr.2008.11.012	12
1		8	0	1	0		@phasemueller CA,2018,DEVENV,V0,PP41,DOI101007/978	1000	...	LENS	0	0	1021.5		4
2		1	0	1	0		Faber-hammond JJ	2016	...	ZEBRAFISH	13	95	2.5	10.1089/zeb.2015.1154	0
1		7	0	1	0		**scientificcommitteeonemergingandnewlyidentifiedh	2005	...	APPR EX METH ASS POT	0	0	3.5		14
2		5	0.01	1	0		Gossage L	2015	...	NAT REV CANCER	15	55	0.5	10.1038/nrc3844	0
1		2	0	1	0		Contractor RG	2004	...	J TOXICOL ENV HEAL A	67	1	0.5	10.1080/15287390490253633	52
2		3	0	1	0		Brown AR	2019	...	ENVIRON SCI TECHNOL	53	463	1.5	10.1021/acs.est.8b04281	6
3		2	0	1	0		Labun K	2016	...	NUCLEIC ACIDS RES	44	0	3.5	10.1093/nar/gkw398	4
2		10	0	1	0		Jud ZR	2011	...	AQUAT BIOL	13	21	3.5	10.3354/ab00351	3
3		1	0	1	0		Love MI	2014	...	GENOME BIOL	15	0	4.5	10.1186/s13059-014-0550-8	19
2		2	0	1	0		Jonz MG	2018	...	ACTA HISTOCHEM	120	623	2.5	10.1016/j.acthis.2018.08.008	4
1		1	0	1	0		Bilotta J	1999	...	BEHAV RES METH INS C	31	178	4.5	10.3758/BF03207707	62
1		2	0	1	0		Aubin-horth N	2005	...	J HERED	96	261	1.5	10.1093/jhered/esi030	34
2		6	0	1	0		Reuss S	2002	...	NEUROSCIENCE	115	645	3.5	10.1016/S0306-4522(02)00536-5	9
2		5	0.03	1	0		Gassmann M	1997	...	KIDNEY INT	51	567	2.5	10.1038/ki.1997.81	7
4		22	0	1	0		Hackerott S	2013	...	PLOS ONE	8	0	3.5	10.1371/journal.pone.0068259	3
1		2	0	1	0		Aiello LP	2005	...	NEW ENGL J MED	353	839	2.5	10.1056/NEJMe058142	12
2		1	0	1	0		Betancur-r R	2011	...	J BIOGEOGR	38	1281	2.5	10.1111/j.1365-2699.2011.02496.x	3
1		2	0	1	0		Braun MH	2003	...	J EXP BIOL	206	3327	1.5	10.1242/jeb.00576	53
7		39	0.04	1	0		Albins MA	2013	...	ENVIRON BIOL FISH	96	1151	2.5	10.1007/s10641-011-9795-1	3
2		2	0	1	0		Nikinmaa M	2001	...	RESP PHYSIOL	128	317	4.5	10.1016/S0034-5687(01)00309-7	9
2		10	0	1	0		Mandic M	2020	...	J EXP BIOL	223	0	1.5	10.1242/jeb.213942	4
5		4	0.1	1	0		Bolger AM	2014	...	BIOINFORMATICS	30	2114	3.5	10.1093/bioinformatics/btu170	6
2		7	0	1	0		Chen TH	2011	...	MAR POLLUT BULL	63	303	1.5	10.1016/j.marpolbul.2011.04.017	21
2		2	0	1	0		Zheng ZP	2021	...	SENSOR ACTUAT B-CHEM	347	0	0.5	10.1016/j.snb.2021.130631	57
2		3	0	1	0		Katayama H	2020	...	CELL	181	1176	0.5	10.1016/j.cell.2020.04.025	4
2		9	0	1	0		De la Paz JF	2017	...	INT J MOL SCI	18	0	3.5	10.3390/ijms18040710	6
2		6	0.01	1	0		Gonzalez P	2006	...	BIOMETALS	19	225	3.5	10.1007/s10534-005-5670-x	1
1		9	0	1	0		Bracci E	1996	...	J NEUROPHYSIOL	75	640	3.5	10.1152/jn.1996.75.2.640	18
2		1	0	1	0		Klaine SJ	2008	...	ENVIRON TOXICOL CHEM	27	1825	1.5	10.1897/08-090.1	70
2		2	0	1	0		Asmonaite G	2016	...	AQUAT TOXICOL	173	143	3.5	10.1016/j.aquatox.2016.01.013	35
2		10	0.09	1	0		Westerfield M	2000	...	ZEBRAFISH BOOK GUIDE	4th	0	3.5		10
2		7	0	1	0		Wang Z	2009	...	NAT REV GENET	10	57	4.5	10.1038/nrg2484	0
1		6	0	1	0		Digregorio PJ	2001	...	J BIOL CHEM	276	1930	-0.5	10.1074/jbc.M003911200	10
7		30	0.02	1	0		Albins MA	2013	...	BIOL INVASIONS	15	29	3.5	10.1007/s10530-012-0266-1	3
2		4	0	1	0		Limonta G	2019	...	SCI REP-UK	9	0	1.5	10.1038/s41598-019-52292-5	6
2		1	0	1	0		Hartsock A	2014	...	DEV BIOL	394	327	0.5	10.1016/j.ydbio.2014.07.024	0
4		10	0.01	1	0		Bates D	2015	...	J STAT SOFTW	67	1	4.5	10.18637/jss.v067.i01	3
4		6	0	1	0		Barriga EH	2013	...	J CELL BIOL	201	759	2.5	10.1083/jcb.201212100	0
2		8	0	1	0		Horri K	2018	...	SCI TOTAL ENVIRON	610	531	0.5	10.1016/j.scitotenv.2017.08.083	8
1		8	0	1	0		Ackerly KL	2020	...	SCI TOTAL ENVIRON	737	0	1.5	10.1016/j.scitotenv.2020.140174	4
2		2	0	1	0		Gagnon JA	2014	...	PLOS ONE	9	0	2.5	10.1371/journal.pone.0098186	8
2		5	0	1	0		Doudna JA	2014	...	SCIENCE	346	1077	3.5	10.1126/science.1258096	31
1		0	0	1	0		Amsterdam A	2004	...	P NATL ACAD SCI USA	101	12792	3.5	10.1073/pnas.0403929101	109
1		5	0	1	0		Butt AA	1998	...	AM J MED SCI	315	50	1.5	10.1097/00000441-199801000-00009	33
2		1	0	1	0		Huang SH	2013	...	BIOMICROFLUIDICS	7	0	1.5	10.1063/1.4833256	0
2		2	0	1	0		Ciofani M	2012	...	CELL	151	289	3.5	10.1016/j.cell.2012.09.016	0
2		5	0.02	1	0		Semenza GL	1999	...	ANNU REV CELL DEV BI	15	551	1.5	10.1146/annurev.cellbio.15.1.551	10
4		13	0.01	1	0		Bosworth CA	2005	...	PROTEOMICS	5	1362	3.5	10.1002/pmic.200401002	1
2		2	0	1	0		Fitzgibbon QP	2007	...	AQUACULTURE	270	358	2.5	10.1016/j.aquaculture.2007.04.038	1
1		10	0	1	0		Braunbeck T	1989	...	AQUAT TOXICOL	14	185	4.5	10.1016/0166-445X(89)90016-7	17
1		8	0	1	0		Giniger E	1998	...	NEURON	20	667	2.5	10.1016/S0896-6273(00)81007-7	20
1		9	0	1	0		Brusselmans K	2005	...	J BIOL CHEM	280	3493	-0.5	10.1074/jbc.M406613200	2
6		9	0.01	1	0		Guo T	2013	...	CHEM COMMUN	49	10820	3.5	10.1039/c3cc45367g	13
2		4	0.02	1	0		Husak JF	2016	...	COMPR PHYSIOL	6	63	4.5	10.1002/cphy.c140061	6
3		3	0	1	0		Domenici P	2012	...	BIOL LETTERS	8	78	4.5	10.1098/rsbl.2011.0591	30
5		22	0	1	0		Johnston MW	2011	...	MAR POLLUT BULL	62	1218	3.5	10.1016/j.marpolbul.2011.03.028	3
2		2	0	1	0		Roberts RJ	2010	...	J FISH DIS	33	789	3.5	10.1111/j.1365-2761.2010.01183.x	49
4		11	0	1	0		Nikinmaa M	2002	...	COMP BIOCHEM PHYS A	133	1	3.5	10.1016/S1095-6433(02)00132-0	2
2		5	0	1	0		Shang EHH	2004	...	ENVIRON SCI TECHNOL	38	4763	4.5	10.1021/es0496423	1
2		3	0	1	0		He CC	2009	...	ANNU REV GENET	43	67	4.5	10.1146/annurev-genet-102808-114910	41
2		8	0	1	0		Gandar A	2017	...	CHEMOSPHERE	188	60	3.5	10.1016/j.chemosphere.2017.08.089	6
2		2	0	1	0		Cui L	2011	...	ORG LETT	13	928	2.5	10.1021/ol102975t	13
1		1	0	1	0		Agabegi ED	2008	...	STEP UP SERIES	0	0	4.5		0
1		5	0	1	0		Abuzzahab MJ	2003	...	NEW ENGL J MED	349	2211	1.5	10.1056/NEJMoa010107	2
3		7	0.01	1	0		Thompson WA	2017	...	ENVIRON SCI TECHNOL	51	12889	3.5	10.1021/acs.est.7b04099	6
2		10	0.01	1	0		Abnet CC	1999	...	TOXICOL APPL PHARM	159	41	4.5	10.1006/taap.1999.8719	7
2		8	0	1	0		Incardona JP	2014	...	P NATL ACAD SCI USA	111	0	4.5	10.1073/pnas.1320950111	8
1		6	0	1	0		Bairam A	2005	...	RESP PHYSIOL NEUROBI	149	217	0.5	10.1016/j.resp.2005.04.017	11
1		4	0	1	0		Oikari A	1992	...	SCIENCE OF THE TOTAL ENVIRONMENT	117-118	367	2.5	10.1016/0048-9697(92)90103-Y	16
2		6	0	1	0		Steele SL	2011	...	J EXP BIOL	214	1445	2.5	10.1242/jeb.052803	5
3		12	0	1	0		Albins MA	2008	...	MAR ECOL PROG SER	367	233	3.5	10.3354/meps07620	3
3		7	0.03	1	0		Kalueff AV	2014	...	TRENDS PHARMACOL SCI	35	63	3.5	10.1016/j.tips.2013.12.002	13
4		14	0	1	0		Rees BB	2001	...	J EXP ZOOL	289	266	4.5	10.1002/1097-010X(20010401/30)289:4<266::AID-JEZ7>3.0.CO;2-5	2
2		9	0	1	0		Lai JCC	2006	...	J EXP BIOL	209	2734	4.5	10.1242/jeb.02279	1
1		4	0	1	0		Halver JE	1989	...	FISH NUTRITION	0	0	4.5		17
6		26	0.06	1	0		Kopp R	2010	...	PHYSIOL GENOMICS	42A	8	3.5	10.1152/physiolgenomics.00052.2010	0
2		4	0	1	0		Aspatwar A	2018	...	J ENZYM INHIB MED CH	33	1064	1.5	10.1080/14756366.2018.1482285	4
2		5	0	1	0		Prasch AL	2003	...	TOXICOL SCI	76	138	4.5	10.1093/toxsci/kfg202	2
2		6	0	1	0		Lenth RUSSELLV	2020	...	CRAN	0	0	0.5		6
2		0	0	1	0		Luo SZ	2017	...	ACS SENSORS	2	1139	3.5	10.1021/acssensors.7b00171	110
1		2	0	1	0		Beere HM	2001	...	SCI STKE	93	0	4.5		22
1		3	0	1	0		Buckley BA	2004	...	PHYSIOL BIOCHEM ZOOL	77	570	2.5	10.1086/420944	45
2		1	0	1	0		Cheng CL	2016	...	INT J DISTRIB SENS N	0	0	0.5	10.1155/2016/1851829	8
1		3	0	1	0		Ema M	1997	...	P NATL ACAD SCI USA	94	4273	2.5	10.1073/pnas.94.9.4273	7
1		9	0	1	0		Boutilier RG	2000	...	COMP BIOCHEM PHYS A	126	481	2.5	10.1016/S1095-6433(00)00234-8	2
3		12	0.01	1	0		Lopez-barneo J	2001	...	ANNU REV PHYSIOL	63	259	4.5	10.1146/annurev.physiol.63.1.259	11
2		12	0	1	0		Cote IM	2010	...	MAR ECOL PROG SER	404	219	1.5	10.3354/meps08458	3
2		1	0	1	0		Cheng JP	2012	...	INT J NANOMED	7	3731	3.5	10.2147/IJN.S30459	71
1		6	0	1	0		Granato M	1996	...	DEVELOPMENT	123	399	3.5		18
3		5	0	1	0		Ko CY	2011	...	CELL DEATH DIFFER	18	1757	4.5	10.1038/cdd.2011.44	0
1		6	0	1	0		Burggren WWTP	1995	...	HYPOXIA BRAIN	0	45	3.5		27
2		6	0	1	0		Inoue D	2011	...	PLOS ONE	6	0	2.5	10.1371/journal.pone.0019713	5
1		5	0	1	0		Baker TL	2001	...	RESP PHYSIOL	129	25	4.5	10.1016/S0034-5687(01)00280-8	11
1		1	0	1	0		Ahlander J	2009	...	BIOCHEM BIOPH RES CO	384	280	-0.5	10.1016/j.bbrc.2009.04.107	72
2		3	0	1	0		Dimitriadi A	2018	...	SCI REP-UK	8	0	2.5	10.1038/s41598-018-25991-8	6
3		8	0.01	1	0		Steele SL	2009	...	AM J PHYSIOL-REG I	297	0	1.5	10.1152/ajpregu.00036.2009	1
2		2	0	1	0		Hiesinger PR	2005	...	CELL	121	607	4.5	10.1016/j.cell.2005.03.012	56
2		12	0	1	0		Green SJ	2009	...	CORAL REEFS	28	107	2.5	10.1007/s00338-008-0446-8	3
3		7	0	1	0		Chevalier A	2016	...	J AM CHEM SOC	138	12009	3.5	10.1021/jacs.6b06229	23
1		5	0	1	0		Aluru N	2005	...	COMP BIOCHEM PHYS C	141	40	-0.5	10.1016/j.cca.2005.05.002	22
1		8	0	1	0		Beckers J	1999	...	MECH DEVELOP	84	165	1.5	10.1016/S0925-4773(99)00065-9	20
1		7	0	1	0		Cazorla O	2000	...	CIRC RES	86	59	1.5	10.1161/01.RES.86.1.59	25
2		4	0	1	0		Bignami S	2014	...	AQUAT BIOL	21	249	4.5	10.3354/ab00598	8
2		7	0	1	0		Minnich B	2002	...	MICROVASC RES	64	425	3.5	10.1006/mvre.2002.2422	11
3		8	0	1	0		Zhu XS	2008	...	J ENVIRON SCI HEAL A	43	278	4.5	10.1080/10934520701792779	21
2		5	0	1	0		Braun MH	2009	...	AM J PHYSIOL-RENAL	296	0	0.5	10.1152/ajprenal.90656.2008	1
4		16	0	1	0		Albins MA	2015	...	MAR ECOL PROG SER	522	231	3.5	10.3354/meps11159	3
3		12	0	1	0		Lendahl U	2009	...	NAT REV GENET	10	821	3.5	10.1038/nrg2665	0
1		1	0	1	0		Adams DS	2006	...	DEVELOPMENT	133	1657	2.5	10.1242/dev.02341	1
2		7	0	1	0		Lovern SB	2006	...	ENVIRON TOXICOL CHEM	25	1132	2.5	10.1897/05-278R.1	14
1		4	0	1	0		Boesch ST	2003	...	J EXP BIOL	206	1907	0.5	10.1242/jeb.00378	10
4		12	0	1	0		Martinovic D	2009	...	AQUAT TOXICOL	95	258	2.5	10.1016/j.aquatox.2008.08.021	1
2		4	0	1	0		Kuznetsova A	2017	...	J STAT SOFTW	82	1	3.5	10.18637/jss.v082.i13	6
2		4	0	1	0		Dubois LJ	2015	...	RADIOTHER ONCOL	116	352	4.5	10.1016/j.radonc.2015.08.022	4
3		8	0	1	0		Wood CM	2018	...	J EXP BIOL	221	0	2.5	10.1242/jeb.163717	4
1		7	0	1	0		Brown JM	1999	...	CANCER RES	59	5863	1.5		10
4		14	0.01	1	0		Chagaris D	2017	...	FISHERIES	42	421	2.5	10.1080/03632415.2017.1340273	3
2		7	0	1	0		Fang Y	2018	...	CHEM COMMUN	54	5454	1.5	10.1039/c8cc02209g	23
2		8	0	1	0		Khurana P	2013	...	DATABASE-OXFORD	0	0	1.5	10.1093/database/bat074	15
2		5	0.01	1	0		Berthelot C	2014	...	NAT COMMUN	5	0	3.5	10.1038/ncomms4657	6
2		3	0	1	0		He CC	2010	...	AUTOPHAGY	6	642	3.5	10.4161/auto.6.5.12092	41
1		4	0	1	0		Flogel U	2001	...	P NATL ACAD SCI USA	98	735	1.5	10.1073/pnas.011460298	9
2		11	0	1	0		Chapman LJ	2000	...	ECOL LETT	3	387	4.5	10.1046/j.1461-0248.2000.00160.x	2
1		4	0	1	0		Gatt R	1998	...	J HAND SURG	23	689	1.5		33
2		4	0	1	0		Barroso FG	2014	...	AQUACULTURE	422	193	3.5	10.1016/j.aquaculture.2013.12.024	37
2		5	0	1	0		Kopp R	2014	...	PLOS ONE	9	0	1.5	10.1371/journal.pone.0089099	5
4		3	0	1	0		Greenald D	2015	...	BMC GENOMICS	16	0	3.5	10.1186/s12864-015-2169-x	0
2		5	0.04	1	0		Fu Q	2017	...	FISH SHELLFISH IMMUN	60	380	0.5	10.1016/j.fsi.2016.12.004	6
1		6	0	1	0		Andersen JB	2003	...	J EXP BIOL	206	857	3.5	10.1242/jeb.00184	11
1		1	0	1	0		Ali MK	2017	...	J TOXICOL PHARM	1	9	4.5	10.1021/TX300021	48
4		12	0.01	1	0		Kajimura S	2006	...	MOL CELL BIOL	26	1142	4.5	10.1128/MCB.26.3.1142-1155.2006	1
3		3	0	1	0		Steenbergen PJ	2011	...	PROG NEURO-PSYCHOPH	35	1432	1.5	10.1016/j.pnpbp.2010.10.010	0
2		4	0	1	0		Bohuslavova R	2019	...	P NATL ACAD SCI USA	116	13414	0.5	10.1073/pnas.1903510116	4
3		11	0	1	0		Levesque KD	2019	...	PHYSIOL BIOCHEM ZOOL	92	349	1.5	10.1086/703178	4
5		11	0.01	1	0		Boutin AT	2008	...	CELL	133	223	1.5	10.1016/j.cell.2008.02.038	12
1		5	0	1	0		Bae DS	2002	...	ENVIRON HEALTH PERSP	110	931	3.5	10.1289/ehp.02110s6931	32
1		4	0	1	0		Lovell RT	1989	...	NUTRITION FEEDING FI	0	0	4.5		17
1		6	0	1	0		Feller MB	1999	...	NEURON	22	653	0.5	10.1016/S0896-6273(00)80724-2	18
2		3	0	1	0		Gallo FT	2018	...	FRONT BEHAV NEUROSCI	12	0	2.5	10.3389/fnbeh.2018.00079	6
2		1	0	1	0		Cai XL	2018	...	J BIOL CHEM	293	15370	1.5	10.1074/jbc.RA118.003004	0
2		1	0	1	0		Hill AJ	2005	...	TOXICOL SCI	86	6	4.5	10.1093/toxsci/kfi110	1
1		1	0	1	0		Abozaid H	2011	...	SEX DEV	5	259	0.5	10.1159/000330120	28
5		13	0.01	1	0		Roesner A	2008	...	FEBS J	275	3633	2.5	10.1111/j.1742-4658.2008.06508.x	0
3		3	0	1	0		Koblitz L	2015	...	PLOS ONE	10	0	1.5	10.1371/journal.pone.0128938	8
1		0	0	1	0		Fritsche R	1997	...	AM ZOOL	37	23	4.5		111
1		0	0	1	0		Agnisola C	2005	...	COMP BIOCHEM PHYS A	142	178	0.5	10.1016/j.cbpb.2005.05.051	112
3		9	0	1	0		Perry SF	2002	...	J EXP ZOOL	293	249	3.5	10.1002/jez.10129	11
2		8	0.07	1	0		Pollenz RS	1996	...	J BIOL CHEM	271	30886	4.5	10.1074/jbc.271.48.30886	7
2		10	0	1	0		Johnston MW	2014	...	MAR POLLUT BULL	88	138	0.5	10.1016/j.marpolbul.2014.09.013	3
2		6	0	1	0		North TE	2009	...	CELL	137	736	3.5	10.1016/j.cell.2009.04.023	0
1		2	0	1	0		Douglas SE	2003	...	DEV COMP IMMUNOL	27	589	0.5	10.1016/S0145-305X(03)00036-3	55
2		10	0	1	0		Cote IM	2013	...	MAR ECOL PROG SER	472	249	1.5	10.3354/meps09992	3
1		0	0	1	0		Adams JM	2018	...	CELL DEATH DIFFER	25	27	3.5	10.1038/cdd.2017.161	113
2		6	0	1	0		Cutting A	2013	...	DEV DYNAM	242	380	3.5	10.1002/dvdy.23944	5
2		9	0	1	0		Gauthier PT	2020	...	ENVIRON POLLUT	259	0	0.5	10.1016/j.envpol.2019.113757	6
2		15	0	1	0		Eisen MB	1998	...	P NATL ACAD SCI USA	95	14863	4.5	10.1073/pnas.95.25.14863	2
2		8	0	1	0		Fritsche R	2000	...	AM J PHYSIOL-REG I	279	0	2.5	10.1152/ajpregu.2000.279.6.R2200	9
2		3	0	1	0		Blanco R	2013	...	CSH PERSPECT MED	3	0	4.5	10.1101/cshperspect.a006569	26
2		2	0	1	0		Del RIOAM	2019	...	CONSERV PHYSIOL	7	0	0.5	10.1093/conphys/coy078	19
1		8	0	1	0		Agius BP	2007	...	J EXP MAR BIOL ECOL	342	30	4.5	10.1016/j.jembe.2006.10.012	3
5		14	0.01	1	0		Abdallah SJ	2015	...	PFLUG ARCH EUR J PHY	467	399	0.5	10.1007/s00424-014-1514-2	5
4		2	0	1	0		Taniguchi CM	2013	...	NAT MED	19	1325	1.5	10.1038/nm.3294	0
2		1	0	1	0		Zhu HC	2020	...	ANAL CHEM	92	1883	1.5	10.1021/acs.analchem.9b04009	57
1		1	0	1	0		Aliriz S	2003	...	PREP BIOCHEM BIOTECH	33	137	3.5	10.1081/PB-120021438	73
2		2	0	1	0		Dorn GW	2008	...	ONCOGENE	27	0	2.5	10.1038/onc.2009.53	12
1		4	0	1	0		Padh H	1990	...	BIOCHEM CELL BIOL	68	1166	3.5	10.1139/o90-173	17
4		6	0.01	1	0		Mendelsohn BA	2008	...	DEV DYNAM	237	1780	3.5	10.1002/dvdy.21581	1
2		4	0	1	0		Liu SS	2014	...	ANAL BIOANAL CHEM	406	7299	3.5	10.1007/s00216-014-8146-4	13
3		9	0	1	0		Eddy C	2016	...	MAR ECOL PROG SER	558	193	2.5	10.3354/meps11838	3
1		2	0	1	0		Ambati J	2003	...	NAT MED	9	1390	4.5	10.1038/nm950	12
1		5	0	1	0		Andrew AS	2003	...	ENVIRON HEALTH PERSP	111	825	2.5	10.1289/ehp.111-1241504	32
1		5	0	1	0		Chang WJ	1999	...	OPHTHALMOLOGY	106	86	0.5	10.1016/S0161-6420(99)90010-6	33
2		14	0.02	1	0		Lien CL	2006	...	PLOS BIOL	4	1386	3.5	10.1371/journal.pbio.0040260	1
3		7	0	1	0		Vatine G	2011	...	FEBS LETT	585	1485	2.5	10.1016/j.febslet.2011.04.007	0
2		7	0	1	0		Hao LH	2009	...	J ENVIRON SCI	21	1459	3.5	10.1016/S1001-0742(08)62440-7	21
1		5	0	1	0		Amsterdam A	1999	...	GENE DEV	13	2713	4.5	10.1101/gad.13.20.2713	7
2		4	0	1	0		Makkar HPS	2014	...	ANIM FEED SCI TECH	197	1	3.5	10.1016/j.anifeedsci.2014.07.008	37
3		1	0	1	0		Jeronimo R	2017	...	J THERM BIOL	68	128	3.5	10.1016/j.jtherbio.2017.02.009	74
2		9	0	1	0		Li H	2018	...	CHEMOSPHERE	207	781	2.5	10.1016/j.chemosphere.2018.05.146	6
1		6	0	1	0		Gibson JR	1999	...	NATURE	402	75	0.5	10.1038/47035	18
2		4	0	1	0		Burger A	2016	...	DEVELOPMENT	143	2025	4.5	10.1242/dev.134809	4
2		9	0	1	0		Sollid J	2005	...	J EXP BIOL	208	1109	4.5	10.1242/jeb.01505	1
2		3	0	1	0		Jutfelt F	2013	...	PLOS ONE	8	0	2.5	10.1371/journal.pone.0065825	30
2		6	0	1	0		Paffett-lugassy N	2007	...	BLOOD	110	2718	1.5	10.1182/blood-2006-04-016535	1
2		3	0	1	0		Nilsson GE	2007	...	J EXP BIOL	210	2403	3.5	10.1242/jeb.000281	1
2		9	0	1	0		Jiang JH	2019	...	ENVIRON POLLUT	253	722	1.5	10.1016/j.envpol.2019.07.081	6
2		3	0	1	0		Ferdinand PHILLIP	2016	...	EXP TRANSL STROKE MED	8	9	4.5		4
2		5	0	1	0		Briggs KJ	2016	...	CELL	166	126	3.5	10.1016/j.cell.2016.05.042	4
1		7	0	1	0		Chuga CY	1998	...	MOL CELL BIOL	18	525	0.5		7
2		6	0.01	1	0		Simon MC	2008	...	NAT REV MOL CELL BIO	9	285	3.5	10.1038/nrm2354	0
1		3	0	1	0		Agencia NACIONALDEVIGILANCIASANITARIA(ANVISA)	2019	...	INDICE MONOGRAFICO 2	0	0	2.5		43
1		5	0	1	0		Childs S	2002	...	DEVELOPMENT	129	973	0.5		9
1		3	0	1	0		*noaa	2005	...	FED REGISTER	70	17386	1.5		45
5		21	0.03	1	0		Dunwoodie SL	2009	...	DEV CELL	17	755	3.5	10.1016/j.devcel.2009.11.008	0
5		12	0.03	1	0		Gou X	2014	...	GENOME RES	24	1308	2.5	10.1101/gr.171876.113	15
2		2	0	1	0		Cambier CJ	2014	...	NATURE	505	218	4.5	10.1038/nature12799	58
1		6	0	1	0		Duan CM	1999	...	J BIOL CHEM	274	37147	2.5	10.1074/jbc.274.52.37147	2
1		5	0	1	0		Grunig E	1998	...	J AM COLL CARDIOL	31	186	3.5	10.1016/S0735-1097(97)00434-8	25
3		5	0.07	1	0		Jonz MG	2015	...	COMP BIOCHEM PHYS A	186	27	1.5	10.1016/j.cbpa.2014.09.002	5
1		7	0	1	0		Amores A	1998	...	SCIENCE	282	1711	0.5	10.1126/science.282.5394.1711	24
2		9	0.1	1	0		Fishman MC	1999	...	P NATL ACAD SCI USA	96	10554	4.5	10.1073/pnas.96.19.10554	10
2		7	0	1	0		Kusakabe T	2002	...	MICROSC RES TECHNIQ	59	207	3.5	10.1002/jemt.10195	11
2		4	0	1	0		Pham J	2009	...	J NEUROSCI METH	178	323	4.5	10.1016/j.jneumeth.2008.12.021	38
3		12	0	1	0		Cote IM	2013	...	BIOL CONSERV	164	50	3.5	10.1016/j.biocon.2013.04.014	3
2		7	0	1	0		Thomas P	2007	...	P ROY SOC B-BIOL SCI	274	2693	3.5	10.1098/rspb.2007.0921	1
1		0	0	1	0		Airhart MJ	2007	...	NEUROTOXICOL TERATOL	29	652	4.5	10.1016/j.ntt.2007.07.005	114
2		11	0	1	0		Heikkila M	2011	...	CELL MOL LIFE SCI	68	3885	3.5	10.1007/s00018-011-0679-5	0
2		1	0	1	0		Chen N	2016	...	BIOCHEM BIOPH RES CO	469	737	0.5	10.1016/j.bbrc.2015.12.046	0
1		1	0	1	0		Abdalla MY	2019	...	TRANSL RES	207	56	2.5	10.1016/j.trsl.2018.12.008	57
2		10	0	1	0		Reid SG	2003	...	RESP PHYSIOL NEUROBI	136	39	2.5	10.1016/S1569-9048(03)00087-9	11
1		3	0	1	0		Achenbach JE	2004	...	J VIROL METHODS	121	1	3.5	10.1016/j.jviromet.2004.05.004	2
2		7	0	1	0		Dean BW	2017	...	DEV NEUROBIOL	77	789	3.5	10.1002/dneu.22471	4
1		0	0	1	0		Abello G	2007	...	INT J DEV BIOL	51	483	3.5	10.1387/ijdb.072343ga	115
2		12	0	1	0		Ton C	2002	...	BIOCHEM BIOPH RES CO	296	1134	2.5	10.1016/S0006-291X(02)02010-7	2
2		0	0	1	0		Kong RYC	2008	...	AQUAT TOXICOL	86	131	4.5	10.1016/j.aquatox.2007.10.011	116
3		10	0	1	0		Schofield PJ	2010	...	AQUAT INVASIONS	5	0	4.5	10.3391/ai.2010.5.S1.024	3
3		2	0	1	0		Senyo SE	2013	...	NATURE	493	433	3.5	10.1038/nature11682	59
2		2	0	1	0		Aliko V	2018	...	FISH SHELLFISH IMMUN	76	101	1.5	10.1016/j.fsi.2018.02.042	47
2		5	0	1	0		Cao YH	2005	...	NAT REV CANCER	5	735	4.5	10.1038/nrc1693	12
2		2	0	1	0		Canseco DC	2015	...	J AM COLL CARDIOL	65	892	1.5	10.1016/j.jacc.2014.12.027	59
2		5	0.01	1	0		Krishnamurthy N	2018	...	CANCER TREAT REV	62	50	2.5	10.1016/j.ctrv.2017.11.002	6
2		4	0	1	0		Gao KS	2014	...	FUNCT PLANT BIOL	41	449	4.5	10.1071/FP13247	36
1		8	0	1	0		Bailly Y	2005	...	ANAT REC	233	143	0.5		11
2		3	0	1	0		Davies R	2011	...	COMP BIOCHEM PHYS A	159	25	3.5	10.1016/j.cbpa.2011.01.012	0
3		6	0	1	0		Ritchie ME	2015	...	NUCLEIC ACIDS RES	43	0	4.5	10.1093/nar/gkv007	4
1		6	0	1	0		Achen MG	2005	...	CANCER CELL	7	121	3.5	10.1016/j.ccr.2005.01.017	12
3		13	0	1	0		Morris JA	2011	...	BIOL INVASIONS	13	7	4.5	10.1007/s10530-010-9786-8	3
2		0	0	1	0		Fornes O	2020	...	NUCLEIC ACIDS RES	48	0	0.5	10.1093/nar/gkz1001	117
1		1	0	1	0		Akbarnia BA	2010	...	SPINE	35	2193	2.5	10.1097/BRS.0b013e3181f070b5	0
2		4	0	1	0		Terova G	2008	...	AQUACULTURE	279	150	3.5	10.1016/j.aquaculture.2008.03.041	0
2		2	0	1	0		Jayne T	2016	...	J ALZHEIMERS DIS	52	781	4.5	10.3233/JAD-151186	6
2		12	0.22	1	0		Corrales J	2014	...	AQUAT TOXICOL	148	16	4.5	10.1016/j.aquatox.2013.12.028	8
2		4	0	1	0		Bhandari RK	2015	...	SCI REP-UK	5	0	4.5	10.1038/srep09303	19
3		5	0	1	0		Simning D	2019	...	AQUAT TOXICOL	214	0	0.5	10.1016/j.aquatox.2019.105234	19
1		7	0	1	0		Cardinaud B	1997	...	J BIOL CHEM	272	2778	1.5	10.1074/jbc.272.5.2778	24
1		5	0	1	0		Conroy G	1999	...	VET REC	144	177	0.5	10.1136/vr.144.7.177	33
1		9	0	1	0		Fagotto F	1997	...	DEVELOPMENT	124	453	4.5		2
3		9	0	1	0		Esbaugh AJ	2016	...	SCI TOTAL ENVIRON	543	644	2.5	10.1016/j.scitotenv.2015.11.068	8
1		7	0	1	0		Arvidsson AK	1998	...	REGUL PEPTIDES	75-6	39	0.5	10.1016/S0167-0115(98)00051-2	24
1		4	0	1	0		Agrawal AA	2001	...	SCIENCE	294	321	3.5	10.1126/science.1060701	2
1		10	0	1	0		Braunbeck T	1990	...	ECOTOX ENVIRON SAFE	19	355	3.5	10.1016/0147-6513(90)90036-5	17
1		8	0	1	0		Dempsey AA	2001	...	J MOL CELL CARDIOL	33	1879	1.5	10.1006/jmcc.2001.1447	2
2		0	0	1	0		Braga MM	2016	...	SCI REP-UK	6	0	2.5	10.1038/srep20279	118
1		6	0	1	0		Alitalo K	2005	...	NATURE	438	946	3.5	10.1038/nature04480	12
1		1	0	1	0		Almeida GMF	2019	...	MBIO	10	0	2.5	10.1128/mBio.01984-19	35
1		5	0	1	0		Bryant PL	1997	...	TERATOLOGY	55	326	3.5		7
1		8	0	1	0		@phasediamante G,2018,DEVENV,V0,PP319,DOI101007/97	1000	...	LENS	0	0	1021.5		4
2		4	0	1	0		Hattenrath-lehmann TK	2015	...	LIMNOL OCEANOGR	60	198	3.5	10.1002/lno.10012	36
3		7	0	1	0		Gerri C	2018	...	BLOOD	131	963	2.5	10.1182/blood-2017-07-797795	4
1		6	0	1	0		Duan CM	1998	...	J NUTR	128	0	3.5	10.1093/jn/128.2.306S	2
1		8	0	1	0		Franklin JL	1999	...	CURR BIOL	9	1448	1.5	10.1016/S0960-9822(00)80114-1	20
1		11	0	1	0		Davey BA	1990	...	INTRO LATTICES ORDER	0	0	4.5		16
3		15	0.01	1	0		Gilmour KM	2001	...	COMP BIOCHEM PHYS A	130	219	4.5	10.1016/S1095-6433(01)00391-9	11
3		5	0.23	1	0		Burggren WW	2016	...	AM J PHYSIOL-REG I	311	0	0.5	10.1152/ajpregu.00022.2016	5
1		4	0	1	0		Aivaliotis M	2004	...	ELECTROPHORESIS	25	3468	4.5	10.1002/elps.200406079	1
2		3	0	1	0		Corrales J	2014	...	COMP BIOCHEM PHYS C	163	37	4.5	10.1016/j.cbpc.2014.02.005	8
2		7	0	1	0		Paterson G	2011	...	CHEMOSPHERE	82	1002	1.5	10.1016/j.chemosphere.2010.10.068	21
2		1	0	1	0		Colacurcio DJ	2016	...	AGEING RES REV	32	75	3.5	10.1016/j.arr.2016.05.004	4
2		11	0	1	0		Kopp R	2005	...	J EXP BIOL	208	2123	4.5	10.1242/jeb.01620	1
2		9	0	1	0		Kumar N	2020	...	CHEMOSPHERE	241	0	0.5	10.1016/j.chemosphere.2019.124980	6
1		8	0	1	0		@phasegalvez F,2018,DEVENV,V0,PP179,DOI101007/978-	1000	...	LENS	0	0	1021.5		4
1		4	0	1	0		Trapp S	1992	...	GWF WASSER ABWASSER	133	495	2.5		16
2		1	0	1	0		Li YL	2013	...	GENE	517	169	4.5	10.1016/j.gene.2012.12.096	15
3		6	0	1	0		Kumar V	2015	...	ENVIRON SCI TECHNOL	49	2625	2.5	10.1021/es5051343	13
2		4	0	1	0		Basnet RM	2019	...	BIOMEDICINES	7	0	1.5	10.3390/biomedicines7010023	6
1		6	0	1	0		Brown MD	2003	...	ANGIOGENESIS	6	1	3.5	10.1023/A:1025809808697	11
2		3	0	1	0		Mao GJ	2013	...	ANAL CHEM	85	7875	4.5	10.1021/ac401518e	13
3		12	0	1	0		Frazer TK	2012	...	REV FISH SCI	20	185	4.5	10.1080/10641262.2012.700655	3
2		6	0	1	0		Thisse B	2004	...	ZFIN DIRECT DATA SUB	0	0	4.5		1
2		4	0	1	0		Lau K	2014	...	PLOS ONE	9	0	1.5	10.1371/journal.pone.0110698	29
2		1	0	1	0		Bae JG	2015	...	CHEM COMMUN	51	12787	1.5	10.1039/c5cc03824c	13
1		9	0	1	0		Derisi JL	1997	...	SCIENCE	278	680	4.5	10.1126/science.278.5338.680	2
3		6	0	1	0		Lee G	2016	...	SCI REP-UK	6	0	3.5	10.1038/srep18928	4
2		1	0	1	0		Barneche DR	2019	...	FUNCT ECOL	33	1256	2.5	10.1111/1365-2435.13348	35
2		4	0	1	0		Eberlein T	2016	...	MAR ECOL PROG SER	543	127	2.5	10.3354/meps11568	36
4		15	0.01	1	0		Kaelin WG	2008	...	MOL CELL	30	393	4.5	10.1016/j.molcel.2008.04.009	0
1		7	0	1	0		Clementi E	1999	...	P NATL ACAD SCI USA	96	1559	1.5	10.1073/pnas.96.4.1559	10
1		0	0	1	0		Allore CA	2021	...	BIOL LETTERS	17	0	0.5	10.1098/rsbl.2021.0329	119
2		2	0	1	0		Alfonso S	2021	...	J FISH BIOL	98	1496	0.5	10.1111/jfb.14599	46
3		12	0	1	0		Awenius C	2001	...	BIOCHEM BIOPH RES CO	287	418	4.5	10.1006/bbrc.2001.5614	9
3		7	0	1	0		Ribas L	2017	...	P NATL ACAD SCI USA	114	0	3.5	10.1073/pnas.1609411114	6
1		1	0	1	0		Davison W	1997	...	COMP BIOCHEM PHYS A	117	67	3.5	10.1016/S0300-9629(96)00284-8	10
1		0	0	1	0		*us EPA	2000	...	MAL SUMM	0	0	4.5		120
2		6	0	1	0		Perry SF	2012	...	RESP PHYSIOL NEUROBI	184	309	1.5	10.1016/j.resp.2012.06.013	5
2		6	0	1	0		Elonen GE	1998	...	ENVIRON TOXICOL CHEM	17	472	0.5	10.1002/etc.5620170319	7
2		2	0	1	0		Diotel N	2010	...	FRONT NEUROENDOCRIN	31	172	0.5	10.1016/j.yfrne.2010.01.003	54
5		22	0.01	1	0		Gardner PG	2015	...	FRONT MAR SCI	2	0	4.5	10.3389/fmars.2015.00007	3
2		9	0	1	0		Mitrovic D	2009	...	AM J PHYSIOL-REG I	297	0	0.5	10.1152/ajpregu.00189.2009	1
2		6	0.01	1	0		Dasgupta S	2016	...	AQUAT TOXICOL	177	250	0.5	10.1016/j.aquatox.2016.05.022	8
1		1	0	1	0		*3m	2006	...	EPAHQOPPT20050015000	0	0	4.5		1
2		6	0	1	0		Chabot D	2008	...	MAR POLLUT BULL	57	287	1.5	10.1016/j.marpolbul.2008.04.001	1
6		26	0	1	0		Andradi-brown DA	2017	...	BIOL INVASIONS	19	939	1.5	10.1007/s10530-016-1358-0	3
2		3	0	1	0		Du SNN	2016	...	J EXP BIOL	219	1130	2.5	10.1242/jeb.132860	5
2		3	0	1	0		De Bock K	2013	...	CELL	154	651	4.5	10.1016/j.cell.2013.06.037	26
2		12	0	1	0		Benkwitt CE	2015	...	BIOL INVASIONS	17	1383	1.5	10.1007/s10530-014-0801-3	3
1		1	0	1	0		*usepa	2007	...	REC DEC ROD ATL WOOD	0	0	3.5		1
1		0	0	1	0		Abraham C	2011	...	GASTROENTEROLOGY	140	1729	1.5	10.1053/j.gastro.2011.02.012	121
1		6	0	1	0		Douglas RM	2001	...	AM J PHYSIOL-REG I	280	0	-0.5	10.1152/ajpregu.2001.280.5.R1555	10
2		13	0	1	0		Layman CA	2012	...	MAR ECOL PROG SER	448	131	3.5	10.3354/meps09511	3
2		8	0	1	0		Beall CM	2010	...	P NATL ACAD SCI USA	107	11459	4.5	10.1073/pnas.1002443107	15
2		5	0.04	1	0		Fu Q	2017	...	DEV COMP IMMUNOL	73	97	0.5	10.1016/j.dci.2017.03.012	6
2		2	0	1	0		Cominassi L	2019	...	PLOS ONE	14	0	0.5	10.1371/journal.pone.0221283	19
2		3	0	1	0		De Bock K	2013	...	CELL METAB	18	634	4.5	10.1016/j.cmet.2013.08.001	26
1		8	0	1	0		Chang BD	2000	...	P NATL ACAD SCI USA	97	4291	2.5	10.1073/pnas.97.8.4291	2
2		5	0	1	0		Nystul TG	2003	...	SCIENCE	302	1038	4.5	10.1126/science.1089705	2
1		4	0	1	0		Abramov AY	2007	...	J NEUROSCI	27	1129	0.5	10.1523/JNEUROSCI.4468-06.2007	9
1		1	0	1	0		Alslev B	2005	...	AQUAT TOXICOL	72	295	2.5	10.1016/j.aquatox.2005.01.005	75
2		10	0	1	0		Burggren WW	2015	...	J EXP BIOL	218	80	3.5	10.1242/jeb.107318	8
1		6	0	1	0		Burleson ML	2000	...	COMP BIOCHEM PHYS A	125	403	2.5	10.1016/S1095-6433(00)00167-7	10
1		7	0	1	0		Bavis RW	2001	...	RESP PHYSIOL	126	183	4.5	10.1016/S0034-5687(01)00206-7	11
2		4	0	1	0		Adeel M	2017	...	ENVIRON INT	99	107	1.5	10.1016/j.envint.2016.12.010	8
3		4	0	1	0		Kwan KM	2007	...	DEV DYNAM	236	3088	4.5	10.1002/dvdy.21343	0
2		2	0	1	0		Tian ZY	2021	...	SCIENCE	371	185	0.5	10.1126/science.abd6951	48
2		7	0	1	0		Wang JX	2011	...	CHEMOSPHERE	83	461	1.5	10.1016/j.chemosphere.2010.12.069	21
1		0	0	1	0		Abraham S	2009	...	CURR BIOL	19	668	2.5	10.1016/j.cub.2009.02.057	122
1		4	0	1	0		Boesch ST	2003	...	J EXP BIOL	206	469	0.5	10.1242/jeb.00095	10
2		6	0	1	0		Lin HF	2005	...	BLOOD	106	3803	3.5	10.1182/blood-2005-01-0179	1
2		8	0	1	0		Cai QL	2013	...	GENOME BIOL	14	0	1.5	10.1186/gb-2013-14-3-r29	15
2		2	0	1	0		Brautigam L	2018	...	REDOX BIOL	17	171	1.5	10.1016/j.redox.2018.04.013	4
2		2	0	1	0		Braggin JE	2019	...	ANN CLIN TRANSL NEUR	6	762	0.5	10.1002/acn3.755	4
2		1	0	1	0		Kumai Y	2011	...	AM J PHYSIOL-REG I	301	0	1.5	10.1152/ajpregu.00282.2011	66
6		13	0.01	1	0		Roesner A	2006	...	J EXP BIOL	209	2129	4.5	10.1242/jeb.02243	1
1		0	0	1	0		Boussat S	2000	...	AM J PHYSIOL-LUNG C	279	0	2.5	10.1152/ajplung.2000.279.2.L371	123
2		13	0	1	0		Johnston MW	2015	...	MAR ECOL PROG SER	533	219	0.5	10.3354/meps11399	3
2		4	0	1	0		Wyatt CN	2007	...	J BIOL CHEM	282	8092	0.5	10.1074/jbc.M608742200	2
2		1	0	1	0		Hsu T	2012	...	ONCOGENE	31	2247	2.5	10.1038/onc.2011.442	39
3		13	0.02	1	0		Barrionuevo WR	1999	...	AM J PHYSIOL-REG I	276	0	3.5	10.1152/ajpregu.1999.276.2.R505	10
2		7	0	1	0		Joyce W	2020	...	BIOL LETTERS	16	0	0.5	10.1098/rsbl.2020.0292	4
5		20	0	1	0		Dahl KA	2016	...	MAR ECOL PROG SER	558	207	0.5	10.3354/meps11898	3
2		1	0	1	0		Federici G	2007	...	AQUAT TOXICOL	84	415	2.5	10.1016/j.aquatox.2007.07.009	70
3		5	0	1	0		Burggren WARREN	2016	...	BIOLOGY-BASEL	5	24	3.5	10.3390/biology5020024	19
3		12	0	1	0		Green SJ	2014	...	ECOL APPL	24	1311	2.5	10.1890/13-0979.1	3
2		3	0	1	0		Yu XINGE	2011	...	INT J PHYSIOL PATHOPHYSIOL PHARMACOL	3	88	1.5		0
2		8	0	1	0		Drutel G	1996	...	BIOCHEM BIOPH RES CO	225	333	4.5	10.1006/bbrc.1996.1176	7
2		5	0	1	0		Hwang WY	2013	...	NAT BIOTECHNOL	31	227	4.5	10.1038/nbt.2501	31
7		13	0	1	0		Pelster B	2018	...	J EXP BIOL	221	0	2.5	10.1242/jeb.163709	4
1		9	0	1	0		Brown SC	2004	...	AM J PATHOL	164	727	0.5	10.1016/S0002-9440(10)63160-4	2
1		6	0	1	0		Asano Y	2005	...	MED BIOL ENG COMPUT	43	126	1.5	10.1007/BF02345133	11
1		1	0	1	0		Agostinelli E	2010	...	AMINO ACIDS	38	353	2.5	10.1007/s00726-009-0431-8	76
2		4	0	1	0		Mathur P	2011	...	BEHAV BRAIN RES	219	234	2.5	10.1016/j.bbr.2011.01.019	38
2		1	0	1	0		He JH	2014	...	NEUROTOXICOL TERATOL	42	35	3.5	10.1016/j.ntt.2014.01.006	13
2		2	0	1	0		Xu KH	2013	...	CHEM COMMUN	49	2554	0.5	10.1039/c3cc38980d	13
3		1	0	1	0		Ge WL	2015	...	J AGR FOOD CHEM	63	1856	3.5	10.1021/jf504895h	51
2		7	0	1	0		Trapnell C	2009	...	BIOINFORMATICS	25	1105	4.5	10.1093/bioinformatics/btp120	0
2		5	0	1	0		Schlueter PJ	2006	...	FASEB J	20	1230	4.5	10.1096/fj.05-3882fje	1
3		7	0	1	0		Li YH	2015	...	J AM CHEM SOC	137	6407	4.5	10.1021/jacs.5b04097	23
1		2	0	1	0		Baba T	2005	...	MOL CELL BIOL	25	10040	1.5	10.1128/MCB.25.22.10040-10051.2005	50
2		1	0	1	0		Cowan M	2017	...	J COMP PHYSIOL B	187	1057	3.5	10.1007/s00360-017-1094-5	74
1		1	0	1	0		Agostinelli E	2012	...	AMINO ACIDS	42	397	0.5	10.1007/s00726-011-1129-2	76
2		6	0	1	0		Jopling C	2012	...	CIRCULATION	126	3017	1.5	10.1161/CIRCULATIONAHA.112.107888	0
6		27	0.2	1	0		Rombough P	2009	...	J EXP BIOL	212	778	1.5	10.1242/jeb.026575	1
2		3	0.01	1	0		Taylor JS	2003	...	GENOME RES	13	382	4.5	10.1101/gr.640303	2
3		6	0.06	1	0		R CORETEAM	2021	...	NONPARAMETRIC KERNEL	0	0	-0.5		6
1		1	0	1	0		Adhikary S	2005	...	NAT REV MOL CELL BIO	6	635	3.5	10.1038/nrm1703	72
2		4	0	1	0		Hodkovicova N	2020	...	ENVIRON SCI POLLUT R	27	1686	0.5	10.1007/s11356-019-06726-2	6
1		6	0	1	0		Baxter RC	2000	...	AM J PHYSIOL-ENDOC M	278	0	1.5	10.1152/ajpendo.2000.278.6.E967	2
1		4	0	1	0		Grange RW	2001	...	AM J PHYSIOL-CELL PH	281	0	1.5	10.1152/ajpcell.2001.281.5.C1487	9
1		6	0	1	0		Berdougo E	2003	...	DEVELOPMENT	130	6121	3.5	10.1242/dev.00838	11
2		2	0	1	0		Bojarczuk A	2016	...	SCI REP-UK	6	0	2.5	10.1038/srep21489	58
2		13	0	1	0		Chu CY	2007	...	FEBS LETT	581	4265	2.5	10.1016/j.febslet.2007.07.073	1
1		5	0	1	0		Clemmons DR	2001	...	ENDOCR REV	22	800	3.5	10.1210/er.22.6.800	2
1		2	0	1	0		Bardet PL	2002	...	J MOL ENDOCRINOL	28	153	4.5	10.1677/jme.0.0280153	50
2		8	0	1	0		Alderman SL	2017	...	ENVIRON TOXICOL CHEM	36	354	1.5	10.1002/etc.3533	8
2		5	0	1	0		Lai KP	2015	...	BMC GENOMICS	16	0	0.5	10.1186/s12864-015-1325-7	29
2		4	0	1	0		Dewhirst MW	2008	...	NAT REV CANCER	8	425	1.5	10.1038/nrc2397	12
1		0	0	1	0		Akter KF	2005	...	REV ENVIRON CONTAM T	184	97	3.5	10.1007/0-387-27565-7_3	124
2		7	0	1	0		Law SHW	2006	...	BMC MOL BIOL	7	0	4.5	10.1186/1471-2199-7-15	1
2		1	0	1	0		Li D	2012	...	ONCOL REP	28	937	3.5	10.3892/or.2012.1861	0
1		3	0	1	0		Alex D	2010	...	J ETHNOPHARMACOL	131	242	1.5	10.1016/j.jep.2010.05.016	0
2		4	0	1	0		Maximino C	2010	...	NAT PROTOC	5	209	3.5	10.1038/nprot.2009.225	38
2		2	0	1	0		Peri F	2008	...	CELL	133	916	1.5	10.1016/j.cell.2008.04.037	56
2		4	0	1	0		Dayrit FM	2015	...	J AM OIL CHEM SOC	92	1	2.5	10.1007/s11746-014-2562-7	37
3		7	0	1	0		Zheng JR	2018	...	BIOSENS BIOELECTRON	119	141	1.5	10.1016/j.bios.2018.08.014	23
2		5	0.1	1	0		Brown AR	2015	...	P NATL ACAD SCI USA	112	0	3.5	10.1073/pnas.1416269112	8
2		9	0	1	0		Green SJ	2014	...	J ANIM ECOL	83	1451	4.5	10.1111/1365-2656.12250	3
1		3	0	1	0		Bruick RK	2003	...	GENE DEV	17	2614	3.5	10.1101/gad.1145503	2
2		4	0	1	0		Tseng YC	2008	...	COMP BIOCHEM PHYS C	148	419	2.5	10.1016/j.cbpc.2008.04.009	1
1		0	0	1	0		Abu-halima M	2020	...	FERTIL STERIL	113	970	1.5	10.1016/j.fertnstert.2019.12.028	125
1		7	0	1	0		Blomqvist AG	1995	...	BBA-GENE STRUCT EXPR	1261	439	3.5	10.1016/0167-4781(95)00051-H	24
2		5	0	1	0		Diaz N	2013	...	AQUACULTURE	408	191	3.5	10.1016/j.aquaculture.2013.05.032	5
3		9	0.02	1	0		Kajimura S	2005	...	P NATL ACAD SCI USA	102	1240	2.5	10.1073/pnas.0407443102	2
2		5	0.01	1	0		Angilletta MJ	2009	...	BIO HABIT	0	1	0.5	10.1093/acprof:oso/9780198570875.001.1	1
1		1	0	1	0		Bremer K	2007	...	THESIS CHRISTIAN ALB	0	95	-0.5		34
1		5	0	1	0		Basu A	2001	...	MUTAT RES	386	171	4.5		32
2		2	0	1	0		Barucca M	2006	...	ENVIRON RES	101	68	3.5	10.1016/j.envres.2005.07.002	1
1		3	0	1	0		*us ENVPROTAG	2006	...	822R02047 EPA	0	0	1.5		2
1		5	0	1	0		Gregorio CC	1999	...	CURR OPIN CELL BIOL	11	18	2.5	10.1016/S0955-0674(99)80003-9	25
3		4	0	1	0		Morgan R	2019	...	CONSERV PHYSIOL	7	0	0.5	10.1093/conphys/coz036	4
1		8	0	1	0		Gale NW	1999	...	GENE DEV	13	1055	1.5	10.1101/gad.13.9.1055	20
2		2	0	1	0		Abdallah SJ	2015	...	J EXP BIOL	218	1777	4.5	10.1242/jeb.116343	4
3		4	0	1	0		Dahlke FT	2020	...	SCIENCE	369	65	0.5	10.1126/science.aaz3658	6
2		13	0	1	0		Claydon JAB	2012	...	MAR ECOL PROG SER	448	119	3.5	10.3354/meps09534	3
1		6	0	1	0		Burggren WARRENW	1997	...	P166	0	0	1.5		27
3		3	0	1	0		Jiang L	2013	...	CELL	153	773	2.5	10.1016/j.cell.2013.04.041	29
2		5	0	1	0		Andreasen EA	2002	...	TOXICOL SCI	68	403	1.5	10.1093/toxsci/68.2.403	7
1		1	0	1	0		Akbarzadeh A	2018	...	BMC GENOMICS	19	0	3.5	10.1186/s12864-018-5108-9	46

## Sheet: reference burstness
Top 26 References with the Strongest Citation Bursts
References	Year	Strength	Begin	End	1994 - 2022
Padilla PA, 2001, P NATL ACAD SCI USA, V98, P7331, DOI 10.1073/pnas.131213198, DOI	2001	5.88	2002	2006	▂▂▂▂▂▂▂▂▃▃▃▃▃▂▂▂▂▂▂▂▂▂▂▂▂▂▂▂▂
Gracey AY, 2001, P NATL ACAD SCI USA, V98, P1993, DOI 10.1073/pnas.98.4.1993, DOI	2001	5.29	2002	2006	▂▂▂▂▂▂▂▂▃▃▃▃▃▂▂▂▂▂▂▂▂▂▂▂▂▂▂▂▂
Ton C, 2003, PHYSIOL GENOMICS, V13, P97, DOI 10.1152/physiolgenomics.00128.2002, DOI	2003	5.88	2005	2008	▂▂▂▂▂▂▂▂▂▂▂▃▃▃▃▂▂▂▂▂▂▂▂▂▂▂▂▂▂
Jonz MG, 2005, J EXP BIOL, V208, P1537, DOI 10.1242/jeb.01564, DOI	2005	3.54	2006	2010	▂▂▂▂▂▂▂▂▂▂▂▂▃▃▃▃▃▂▂▂▂▂▂▂▂▂▂▂▂
Van DERMEERDLM, 2005, AM J PHYSIOL-REG I, V289, P0, DOI 10.1152/ajpregu.00089.2005, DOI	2005	5.66	2008	2010	▂▂▂▂▂▂▂▂▂▂▂▂▂▂▃▃▃▂▂▂▂▂▂▂▂▂▂▂▂
Rojas DA, 2007, GENE EXPR PATTERNS, V7, P339, DOI 10.1016/j.modgep.2006.08.002, DOI	2007	4.64	2009	2012	▂▂▂▂▂▂▂▂▂▂▂▂▂▂▂▃▃▃▃▂▂▂▂▂▂▂▂▂▂
Cao RH, 2008, PLOS ONE, V3, P0, DOI 10.1371/journal.pone.0002748, DOI	2008	4.16	2009	2010	▂▂▂▂▂▂▂▂▂▂▂▂▂▂▂▃▃▂▂▂▂▂▂▂▂▂▂▂▂
Nikinmaa M, 2005, AM J PHYSIOL-REG I, V288, P0, DOI 10.1152/ajpregu.00626.2004, DOI	2005	3.56	2009	2010	▂▂▂▂▂▂▂▂▂▂▂▂▂▂▂▃▃▂▂▂▂▂▂▂▂▂▂▂▂
Van ROOIJENE, 2009, BLOOD, V113, P6449, DOI 10.1182/blood-2008-07-167890, DOI	2009	6.78	2010	2014	▂▂▂▂▂▂▂▂▂▂▂▂▂▂▂▂▃▃▃▃▃▂▂▂▂▂▂▂▂
Lee SLC, 2009, P NATL ACAD SCI USA, V106, P19485, DOI 10.1073/pnas.0909228106, DOI	2009	3.55	2010	2011	▂▂▂▂▂▂▂▂▂▂▂▂▂▂▂▂▃▃▂▂▂▂▂▂▂▂▂▂▂
Spence R, 2008, BIOL REV, V83, P13, DOI 10.1111/j.1469-185X.2007.00030.x, DOI	2008	3.53	2010	2013	▂▂▂▂▂▂▂▂▂▂▂▂▂▂▂▂▃▃▃▃▂▂▂▂▂▂▂▂▂
Van ROOIJENE, 2010, DIS MODEL MECH, V3, P343, DOI 10.1242/dmm.004036, DOI	2010	4.35	2012	2015	▂▂▂▂▂▂▂▂▂▂▂▂▂▂▂▂▂▂▃▃▃▃▂▂▂▂▂▂▂
Kopp R, 2011, PHYSIOL GENOMICS, V43, P506, DOI 10.1152/physiolgenomics.00250.2010, DOI	2011	5.71	2013	2015	▂▂▂▂▂▂▂▂▂▂▂▂▂▂▂▂▂▂▂▃▃▃▂▂▂▂▂▂▂
Qin Z, 2010, J PHYSIOL-LONDON, V588, P861, DOI 10.1113/jphysiol.2009.184739, DOI	2010	4.12	2013	2014	▂▂▂▂▂▂▂▂▂▂▂▂▂▂▂▂▂▂▂▃▃▂▂▂▂▂▂▂▂
Semenza GL, 2012, CELL, V148, P399, DOI 10.1016/j.cell.2012.01.021, DOI	2012	5.45	2014	2017	▂▂▂▂▂▂▂▂▂▂▂▂▂▂▂▂▂▂▂▂▃▃▃▃▂▂▂▂▂
Egg M, 2013, CHRONOBIOL INT, V30, P510, DOI 10.3109/07420528.2012.754447, DOI	2013	4.56	2014	2015	▂▂▂▂▂▂▂▂▂▂▂▂▂▂▂▂▂▂▂▂▃▃▂▂▂▂▂▂▂
Howe K, 2013, NATURE, V496, P498, DOI 10.1038/nature12111, DOI	2013	4.19	2014	2017	▂▂▂▂▂▂▂▂▂▂▂▂▂▂▂▂▂▂▂▂▃▃▃▃▂▂▂▂▂
Zhang P, 2012, AM J PHYSIOL-REG I, V303, P0, DOI 10.1152/ajpregu.00340.2012, DOI	2012	3.42	2014	2015	▂▂▂▂▂▂▂▂▂▂▂▂▂▂▂▂▂▂▂▂▃▃▂▂▂▂▂▂▂
Santhakumar K, 2012, CANCER RES, V72, P4017, DOI 10.1158/0008-5472.CAN-11-3148, DOI	2012	6.09	2015	2016	▂▂▂▂▂▂▂▂▂▂▂▂▂▂▂▂▂▂▂▂▂▃▃▂▂▂▂▂▂
Robertson CE, 2014, P ROY SOC B-BIOL SCI, V281, P0, DOI 10.1098/rspb.2014.0637, DOI	2014	5.33	2015	2019	▂▂▂▂▂▂▂▂▂▂▂▂▂▂▂▂▂▂▂▂▂▃▃▃▃▃▂▂▂
Shakarchi K, 2013, J EXP BIOL, V216, P869, DOI 10.1242/jeb.079657, DOI	2013	4.26	2015	2017	▂▂▂▂▂▂▂▂▂▂▂▂▂▂▂▂▂▂▂▂▂▃▃▃▂▂▂▂▂
Porteus CS, 2014, J PHYSIOL-LONDON, V592, P3075, DOI 10.1113/jphysiol.2014.271098, DOI	2014	4.36	2016	2017	▂▂▂▂▂▂▂▂▂▂▂▂▂▂▂▂▂▂▂▂▂▂▃▃▂▂▂▂▂
Green SJ, 2012, PLOS ONE, V7, P0, DOI 10.1371/journal.pone.0032596, DOI	2012	3.81	2016	2017	▂▂▂▂▂▂▂▂▂▂▂▂▂▂▂▂▂▂▂▂▂▂▃▃▂▂▂▂▂
Macrae CA, 2015, NAT REV DRUG DISCOV, V14, P721, DOI 10.1038/nrd4627, DOI	2015	3.41	2016	2018	▂▂▂▂▂▂▂▂▂▂▂▂▂▂▂▂▂▂▂▂▂▂▃▃▃▂▂▂▂
Gerri C, 2017, NAT COMMUN, V8, P0, DOI 10.1038/ncomms15492, DOI	2017	3.97	2019	2022	▂▂▂▂▂▂▂▂▂▂▂▂▂▂▂▂▂▂▂▂▂▂▂▂▂▃▃▃▃
Pan YK, 2019, J EXP BIOL, V222, P0, DOI 10.1242/jeb.204800, DOI	2019	5.35	2020	2022	▂▂▂▂▂▂▂▂▂▂▂▂▂▂▂▂▂▂▂▂▂▂▂▂▂▂▃▃▃

## Sheet: zebrafish author
Freq	Burst	Degree	Centrality	Sigma	PageRank	Keyword	Author	Year	Title	Source	Vol	Page	Half-life	DOI	ClusterID
38	9.37	30	0.07	1.81	0		Padilla PA	2002	...	SO	0	0	8.5
38	4.67	56	0.11	1.65	0		Gracey AY	2002	...	SO	0	0	10.5
25	5.46	35	0.09	1.61	0		Bradford MM	2000	...	SO	0	0	8.5
60	7.26	30	0.05	1.45	0		Ton C	2005	...	SO	0	0	7.5
44	7.31	29	0.05	1.44	0		Kajimura S	2008	...	SO	0	0	5.5
31	4.43	28	0.08	1.4	0		Lawson ND	2009	...	SO	0	0	5.5
52	5.02	22	0.05	1.27	0		Shang EHH	2008	...	SO	0	0	6.5
35	8.89	19	0.03	1.26	0		Van ROOIJENE	2010	...	SO	0	0	3.5
37	4.05	32	0.06	1.26	0		Diaz RJ	2008	...	SO	0	0	7.5
7	3.51	11	0.07	1.25	0		Bates D	2020	...	SO	0	0	0.5
8	3.79	21	0.05	1.18	0		Fox J	2020	...	SO	0	0	0.5
17	7.82	22	0.02	1.17	0		Schwerte T	2007	...	SO	0	0	2.5
20	6.26	15	0.02	1.14	0		Rojas DA	2009	...	SO	0	0	5.5
26	6.25	8	0.02	1.14	0		Zhang J	2017	...	SO	0	0	1.5
26	3.77	31	0.03	1.13	0		Farrell AP	2008	...	SO	0	0	8.5
25	5.83	20	0.02	1.13	0		Scott GR	2015	...	SO	0	0	4.5
29	5.31	21	0.02	1.13	0		Nilsson GE	2008	...	SO	0	0	7.5
22	4.96	23	0.03	1.13	0		Richards JG	2012	...	SO	0	0	4.5
33	5.82	8	0.02	1.12	0		Oecd	2011	...	SO	0	0	7.5
28	4.51	11	0.03	1.12	0		Howe K	2016	...	SO	0	0	3.5
26	4.85	22	0.02	1.11	0		Jacob E	2006	...	SO	0	0	7.5
30	5.76	15	0.02	1.11	0		Kaelin WG	2009	...	SO	0	0	6.5
35	5.8	17	0.02	1.1	0		Wu RSS	2008	...	SO	0	0	4.5
45	3.77	10	0.02	1.09	0		[anonymous]	2013	...	SO	0	0	4.5
20	4.24	16	0.02	1.09	0		Iyer NV	2013	...	SO	0	0	1.5
15	3.64	16	0.02	1.08	0		Bruick RK	2007	...	SO	0	0	5.5
11	4.22	12	0.02	1.08	0		Egg M	2014	...	SO	0	0	0.5
20	7.04	13	0.01	1.08	0		Kopp R	2013	...	SO	0	0	1.5
9	4.62	28	0.02	1.08	0		Burmester T	2006	...	SO	0	0	2.5
18	7.43	6	0.01	1.08	0		R CORETEAM	2019	...	SO	0	0	0.5
10	3.98	16	0.02	1.08	0		Seebacher F	2018	...	SO	0	0	0.5
9	4.83	5	0.02	1.08	0		Fent K	2018	...	SO	0	0	-0.5
28	4.08	8	0.02	1.07	0		Li Y	2012	...	SO	0	0	6.5
19	4.38	18	0.02	1.07	0		Roesner A	2009	...	SO	0	0	3.5
17	4.26	8	0.02	1.07	0		Ankley GT	2011	...	SO	0	0	5.5
22	4.32	12	0.01	1.07	0		Rytkonen KT	2015	...	SO	0	0	1.5
13	5.14	8	0.01	1.06	0		Engeszer RE	2014	...	SO	0	0	6.5
26	4.87	20	0.01	1.05	0		Milsom WK	2006	...	SO	0	0	9.5
32	6.63	5	0.01	1.05	0		Wang Y	2015	...	SO	0	0	3.5
9	4.98	12	0.01	1.05	0		Hochachka PW	2008	...	SO	0	0	0.5
16	7.59	7	0.01	1.05	0		Schindelin J	2020	...	SO	0	0	0.5
28	9.86	16	0	1.04	0		Van DERMEERDLM	2008	...	SO	0	0	2.5
9	4.68	5	0.01	1.04	0		Tang RY	2011	...	SO	0	0	1.5
11	3.43	11	0.01	1.04	0		Claireaux G	2010	...	SO	0	0	8.5
10	3.46	12	0.01	1.04	0		Dahl KA	2017	...	SO	0	0	1.5
13	4.5	8	0.01	1.03	0		Jopling C	2017	...	SO	0	0	1.5
19	6.59	3	0	1.03	0		Zhang Y	2017	...	SO	0	0	1.5
11	4.78	12	0.01	1.03	0		Cao RH	2009	...	SO	0	0	0.5
7	3.76	11	0.01	1.03	0		Kim S	2018	...	SO	0	0	0.5
9	3.57	15	0.01	1.03	0		Brown JM	2001	...	SO	0	0	18.5
16	4.42	12	0.01	1.03	0		Ferrara N	2010	...	SO	0	0	4.5
10	4.06	7	0.01	1.03	0		Folkman J	2010	...	SO	0	0	4.5
19	7.47	4	0	1.02	0		Wang J	2018	...	SO	0	0	2.5
9	4.05	11	0	1.02	0		Dunwoodie SL	2013	...	SO	0	0	0.5
12	4.63	10	0	1.02	0		Sollid J	2006	...	SO	0	0	4.5
10	4.45	6	0	1.02	0		Gemberling M	2018	...	SO	0	0	0.5
7	3.59	18	0	1.01	0		Schmidt M	2006	...	SO	0	0	1.5
6	3.46	12	0	1.01	0		Fraser J	2009	...	SO	0	0	1.5
14	3.71	13	0	1.01	0		Morris JA	2012	...	SO	0	0	6.5
7	3.59	7	0	1.01	0		Corrales J	2019	...	SO	0	0	-0.5
11	3.78	5	0	1.01	0		Zhang X	2018	...	SO	0	0	1.5
12	4.95	7	0	1.01	0		Kikuchi K	2019	...	SO	0	0	0.5
15	4.36	9	0	1.01	0		Porteus CS	2016	...	SO	0	0	0.5
13	4.4	14	0	1.01	0		Vulesevic B	2010	...	SO	0	0	4.5
13	5.1	12	0	1.01	0		Prabhakar NR	2006	...	SO	0	0	8.5
7	3.59	21	0	1.01	0		Fuchs C	2006	...	SO	0	0	1.5
19	5.22	9	0	1.01	0		Mandic M	2016	...	SO	0	0	2.5
1		3	0	1	0		Versteeg DJ	1995	...	SO	0	0	-0.5
4		1	0	1	0		Diaz N	2017	...	SO	0	0	-0.5
2		12	0	1	0		Belair CD	2003	...	SO	0	0	0.5
5		1	0	1	0		Robinson MD	2020	...	SO	0	0	-0.5
1		2	0	1	0		Aliriz S	2007	...	SO	0	0	-0.5
2		2	0	1	0		Hughes GM	2006	...	SO	0	0	-0.5
2		8	0	1	0		Pollock MS	2022	...	SO	0	0	-0.5
20		11	0.01	1	0		Randall DJ	2010	...	SO	0	0	5.5
2		5	0	1	0		Lee WS	2022	...	SO	0	0	-0.5
3		1	0	1	0		Steele SL	2011	...	SO	0	0	-0.5
2		3	0	1	0		Auerbach R	2012	...	SO	0	0	-0.5
3		0	0	1	0		Truong L	2015	...	SO	0	0	-0.5
12		21	0.03	1	0		Jaakkola P	2012	...	SO	0	0	5.5
3		3	0	1	0		Newman M	2021	...	SO	0	0	-0.5
1		6	0	1	0		Blagosklonny MV	2005	...	SO	0	0	-0.5
2		9	0	1	0		Bayliss PE	2012	...	SO	0	0	-0.5
7		7	0	1	0		Schofield PJ	2015	...	SO	0	0	3.5
3		2	0	1	0		Alestrom P	2018	...	SO	0	0	-0.5
2		6	0	1	0		Cheshenko K	2011	...	SO	0	0	-0.5
1		21	0	1	0		Caron G	1995	...	SO	0	0	-0.5
3		5	0	1	0		Kim HJ	2018	...	SO	0	0	-0.5
3		2	0	1	0		Bustin SA	2011	...	SO	0	0	-0.5
2		7	0	1	0		Spitsbergen JM	1999	...	SO	0	0	-0.5
3		3	0	1	0		Hwang WY	2021	...	SO	0	0	-0.5
3		0	0	1	0		Bakkers J	2017	...	SO	0	0	-0.5
1		0	0	1	0		Abate C	2008	...	SO	0	0	-0.5
2		5	0	1	0		Hansen SF	2013	...	SO	0	0	-0.5
4		3	0	1	0		Taniguchi CM	2015	...	SO	0	0	-0.5
3		1	0	1	0		Green BS	2017	...	SO	0	0	-0.5
1		4	0	1	0		Ghadially FN	1994	...	SO	0	0	-0.5
3		4	0	1	0		Gardner PG	2020	...	SO	0	0	-0.5
2		7	0	1	0		Crespel A	2022	...	SO	0	0	-0.5
1		4	0	1	0		Butt AA	2000	...	SO	0	0	-0.5
2		11	0	1	0		Pesce A	2008	...	SO	0	0	-0.5
3		1	0	1	0		Choi JE	2016	...	SO	0	0	-0.5
5		1	0	1	0		Clark TD	2020	...	SO	0	0	-0.5
3		8	0	1	0		Forth HP	2020	...	SO	0	0	-0.5
2		3	0	1	0		Din	2014	...	SO	0	0	-0.5
3		6	0	1	0		Munoz RC	2016	...	SO	0	0	-0.5
2		3	0	1	0		Link V	2009	...	SO	0	0	-0.5
6		10	0.01	1	0		Barbour AB	2017	...	SO	0	0	2.5
2		4	0	1	0		Baltz DM	2007	...	SO	0	0	-0.5
3		3	0	1	0		Yu J	2018	...	SO	0	0	-0.5
1		6	0	1	0		Degraaf F	2001	...	SO	0	0	-0.5
6		2	0	1	0		Langmead B	2018	...	SO	0	0	2.5
2		2	0	1	0		Sayes CM	2008	...	SO	0	0	-0.5
1		4	0	1	0		Burggren WARRENW	1999	...	SO	0	0	-0.5
1		3	0	1	0		Bernasconi P	2004	...	SO	0	0	-0.5
6		3	0	1	0		Kim JW	2020	...	SO	0	0	-0.5
2		11	0	1	0		Ohlberger J	2022	...	SO	0	0	-0.5
2		3	0	1	0		Ip YK	2012	...	SO	0	0	-0.5
3		5	0	1	0		Kotch LE	2015	...	SO	0	0	-0.5
3		2	0	1	0		Fernandino JI	2017	...	SO	0	0	-0.5
1		3	0	1	0		Reynolds ES	1994	...	SO	0	0	-0.5
1		3	0	1	0		Lee SK	1995	...	SO	0	0	-0.5
2		2	0	1	0		Bar M	2014	...	SO	0	0	-0.5
1		9	0	1	0		Booth JH	2003	...	SO	0	0	-0.5
5		8	0.01	1	0		Cummins EP	2010	...	SO	0	0	9.5
5		7	0	1	0		Erler JT	2009	...	SO	0	0	0.5
3		4	0	1	0		Compernolle V	2021	...	SO	0	0	-0.5
6		8	0.01	1	0		Rankin EB	2012	...	SO	0	0	2.5
4		0	0	1	0		Schneider CA	2019	...	SO	0	0	-0.5
3		3	0	1	0		Lahnsteiner F	2021	...	SO	0	0	-0.5
3		6	0	1	0		Buckley BA	2021	...	SO	0	0	-0.5
3		1	0	1	0		Kamei H	2016	...	SO	0	0	-0.5
9		14	0.01	1	0		Burggren W	1999	...	SO	0	0	17.5
9	4.9	3	0	1	0		Haase VH	2015	...	SO	0	0	-0.5
4		3	0	1	0		Wiegand C	2018	...	SO	0	0	-0.5
2		4	0	1	0		Li YH	2022	...	SO	0	0	-0.5
3		9	0.01	1	0		Amsterdam A	2004	...	SO	0	0	8.5
7		7	0	1	0		Sundin L	2006	...	SO	0	0	-0.5
23		10	0.01	1	0		Spence R	2010	...	SO	0	0	7.5
4		1	0	1	0		Huang CJ	2019	...	SO	0	0	-0.5
3		0	0	1	0		Liu C	2021	...	SO	0	0	-0.5
2		2	0	1	0		Pelegri F	2012	...	SO	0	0	-0.5
8		9	0.02	1	0		Asharani PV	2012	...	SO	0	0	5.5
3		4	0	1	0		Li XY	2018	...	SO	0	0	-0.5
2		7	0	1	0		Poland A	1999	...	SO	0	0	-0.5
5		18	0.01	1	0		Hofmann GE	2008	...	SO	0	0	8.5
2		4	0	1	0		Adams LK	2009	...	SO	0	0	-0.5
2		6	0	1	0		Laemmli UK	2007	...	SO	0	0	-0.5
15	6.19	1	0	1	0		Liu Y	2019	...	SO	0	0	0.5
1		7	0	1	0		Andersen JB	2007	...	SO	0	0	-0.5
3		1	0	1	0		Li ZH	2019	...	SO	0	0	-0.5
3		1	0	1	0		Liu X	2021	...	SO	0	0	-0.5
3		2	0	1	0		Serbedzija GN	2016	...	SO	0	0	-0.5
3		3	0	1	0		Hoppeler H	2011	...	SO	0	0	-0.5
3		0	0	1	0		Krock BRYANL	2017	...	SO	0	0	-0.5
2		5	0	1	0		Giesy JP	2011	...	SO	0	0	-0.5
3		1	0	1	0		Ma Y	2021	...	SO	0	0	-0.5
2		2	0	1	0		Hollert H	2013	...	SO	0	0	-0.5
2		4	0	1	0		Fangue NA	2014	...	SO	0	0	-0.5
13	4.99	2	0	1	0		Liu J	2019	...	SO	0	0	1.5
6		10	0.01	1	0		Ciuhandu CS	2011	...	SO	0	0	5.5
2		4	0	1	0		Cossins A	2010	...	SO	0	0	-0.5
3		2	0	1	0		Huang CX	2017	...	SO	0	0	-0.5
7		2	0	1	0		Liu L	2017	...	SO	0	0	3.5
3		1	0	1	0		Ko CY	2016	...	SO	0	0	-0.5
3		3	0	1	0		Liu S	2018	...	SO	0	0	-0.5
5		15	0.01	1	0		Hanahan D	2009	...	SO	0	0	10.5
15		18	0.04	1	0		Mendelsohn BA	2012	...	SO	0	0	4.5
7		17	0.02	1	0		Alderman SL	2013	...	SO	0	0	7.5
1		8	0	1	0		Baker K	2001	...	SO	0	0	-0.5
1		3	0	1	0		Trapp S	1995	...	SO	0	0	-0.5
3		11	0	1	0		Baker J	2002	...	SO	0	0	8.5
3		9	0	1	0		Guo T	2018	...	SO	0	0	-0.5
2		4	0.01	1	0		Chilov D	2014	...	SO	0	0	-0.5
2		6	0	1	0		Pollenz RS	2001	...	SO	0	0	-0.5
1		0	0	1	0		Binohlan C	2005	...	SO	0	0	-0.5
14		14	0.02	1	0		Nasevicius A	2002	...	SO	0	0	12.5
4		3	0	1	0		Lee SLC	2010	...	SO	0	0	-0.5
2		10	0	1	0		Kusakabe T	2006	...	SO	0	0	-0.5
1		3	0	1	0		Padh H	1994	...	SO	0	0	-0.5
2		10	0	1	0		Rugh R	2006	...	SO	0	0	-0.5
5		2	0	1	0		Yang Y	2019	...	SO	0	0	-0.5
2		1	0	1	0		Liegeois S	2008	...	SO	0	0	-0.5
1		8	0	1	0		Busby WH	2002	...	SO	0	0	-0.5
2		12	0	1	0		Cheung WWL	2022	...	SO	0	0	-0.5
2		7	0	1	0		Hankeln T	2006	...	SO	0	0	-0.5
4		1	0	1	0		Yang J	2019	...	SO	0	0	-0.5
17	4.93	2	0	1	0		Wang L	2015	...	SO	0	0	4.5
3		1	0	1	0		Luzio A	2018	...	SO	0	0	-0.5
12		5	0.01	1	0		Wang H	2010	...	SO	0	0	7.5
3		3	0	1	0		Morimoto RI	2021	...	SO	0	0	-0.5
9		10	0.01	1	0		Iwama GK	2010	...	SO	0	0	8.5
2		5	0	1	0		Alfonso S	2022	...	SO	0	0	-0.5
2		5	0	1	0		Flik G	2011	...	SO	0	0	-0.5
1		10	0	1	0		Ali DW	2000	...	SO	0	0	-0.5
6		5	0	1	0		Stainier DYR	2010	...	SO	0	0	4.5
1		4	0	1	0		Halver JE	1994	...	SO	0	0	-0.5
4		1	0	1	0		Wang Z	2012	...	SO	0	0	-0.5
3		2	0	1	0		Pfaffl MW	2018	...	SO	0	0	-0.5
3		3	0	1	0		Ishimatsu A	2014	...	SO	0	0	-0.5
7		5	0	1	0		Wang S	2015	...	SO	0	0	4.5
2		9	0	1	0		Guiney PD	1999	...	SO	0	0	-0.5
3		2	0	1	0		Wang T	2014	...	SO	0	0	-0.5
3		8	0	1	0		Bisgard GE	2004	...	SO	0	0	1.5
2		5	0	1	0		Mandriota SJ	2009	...	SO	0	0	-0.5
3		4	0	1	0		Jao LE	2020	...	SO	0	0	-0.5
3		3	0	1	0		Ge WL	2019	...	SO	0	0	-0.5
3		4	0	1	0		Johansen JL	2019	...	SO	0	0	-0.5
1		9	0	1	0		Carver LA	2000	...	SO	0	0	-0.5
2		0	0	1	0		Inui M	2008	...	SO	0	0	-0.5
1		4	0	1	0		*us ENVPROTAG	2008	...	SO	0	0	-0.5
5		6	0	1	0		Somero GN	2007	...	SO	0	0	8.5
3		5	0	1	0		Alderdice DF	2004	...	SO	0	0	9.5
3		1	0	1	0		Tucker NR	2015	...	SO	0	0	-0.5
3		1	0	1	0		Sies H	2018	...	SO	0	0	-0.5
3		0	0	1	0		Isogai S	2011	...	SO	0	0	-0.5
39		31	0.03	1	0		Burleson ML	2006	...	SO	0	0	8.5
2		6	0	1	0		Akhavan O	2018	...	SO	0	0	-0.5
5		9	0	1	0		Craig PM	2010	...	SO	0	0	6.5
4		0	0	1	0		Cheng CH	2021	...	SO	0	0	-0.5
3		2	0	1	0		Apha	2018	...	SO	0	0	-0.5
2		3	0	1	0		Schwede T	2007	...	SO	0	0	-0.5
1		2	0	1	0		Bergmeyer HU	2002	...	SO	0	0	-0.5
2		5	0	1	0		Andrews SR	2022	...	SO	0	0	-0.5
5		3	0	1	0		Alvarez Y	2010	...	SO	0	0	-0.5
1		5	0	1	0		Delamo FF	2001	...	SO	0	0	-0.5
3		4	0	1	0		Lendahl U	2013	...	SO	0	0	-0.5
2		5	0	1	0		Lee KJ	2012	...	SO	0	0	-0.5
2		1	0	1	0		Adams RH	2010	...	SO	0	0	-0.5
2		5	0	1	0		Giaccia AJ	2011	...	SO	0	0	-0.5
1		6	0	1	0		Baler R	2004	...	SO	0	0	-0.5
3		4	0	1	0		Jain RK	2020	...	SO	0	0	-0.5
3		4	0	1	0		Burnham KP	2020	...	SO	0	0	-0.5
3		0	0	1	0		Gao M	2021	...	SO	0	0	-0.5
4		6	0	1	0		Oberdorster E	2008	...	SO	0	0	0.5
3		6	0	1	0		Schofield PAMELAJ	2016	...	SO	0	0	-0.5
2		6	0	1	0		Maccormack TJ	2009	...	SO	0	0	-0.5
1		7	0	1	0		Artyukhin EN	2007	...	SO	0	0	-0.5
13		15	0.01	1	0		Wang GL	2003	...	SO	0	0	9.5
3		5	0.01	1	0		Gu J	2021	...	SO	0	0	-0.5
2		3	0	1	0		Mccullough KD	2022	...	SO	0	0	-0.5
2		6	0	1	0		Kahn P	2012	...	SO	0	0	-0.5
3		0	0	1	0		He L	2022	...	SO	0	0	-0.5
9		11	0.01	1	0		Esbaugh AJ	2009	...	SO	0	0	6.5
1		8	0	1	0		Anderson GL	2001	...	SO	0	0	-0.5
1		5	0	1	0		Artavanistsakonas S	2001	...	SO	0	0	-0.5
3		2	0	1	0		Miller S	2021	...	SO	0	0	-0.5
1		3	0	1	0		Peute J	1994	...	SO	0	0	-0.5
3		2	0	1	0		Kumai Y	2021	...	SO	0	0	-0.5
7		11	0	1	0		Coccimiglio ML	2014	...	SO	0	0	6.5
1		3	0	1	0		Navarre O	1994	...	SO	0	0	-0.5
19		17	0.01	1	0		Gilmour KM	2006	...	SO	0	0	6.5
4		6	0	1	0		Bosworth CA	2009	...	SO	0	0	-0.5
15		15	0.02	1	0		Maxwell PH	2009	...	SO	0	0	6.5
1		3	0	1	0		Philips MJ	1994	...	SO	0	0	-0.5
2		4	0	1	0		Kemp PJ	2008	...	SO	0	0	-0.5
2		3	0	1	0		Huey RB	2022	...	SO	0	0	-0.5
4		5	0	1	0		Colvin VL	2009	...	SO	0	0	0.5
2		5	0	1	0		Hao LH	2013	...	SO	0	0	-0.5
3		2	0	1	0		Lammer E	2019	...	SO	0	0	-0.5
1		0	0	1	0		Adams SL	2006	...	SO	0	0	-0.5
1		3	0	1	0		Mccarthy JF	1995	...	SO	0	0	-0.5
4		17	0	1	0		Brunori M	2006	...	SO	0	0	1.5
1		4	0	1	0		Cazorla O	2002	...	SO	0	0	-0.5
1		6	0	1	0		Anagnostou A	2007	...	SO	0	0	-0.5
1		3	0	1	0		Barut BA	2003	...	SO	0	0	-0.5
3		1	0	1	0		Fry FEJ	2010	...	SO	0	0	-0.5
2		2	0	1	0		Carlson EA	2011	...	SO	0	0	-0.5
16		15	0.02	1	0		Rombough PJ	2005	...	SO	0	0	11.5
5		4	0	1	0		Chen L	2010	...	SO	0	0	5.5
4		1	0	1	0		Kumar V	2018	...	SO	0	0	-0.5
2		7	0	1	0		Chen K	2022	...	SO	0	0	-0.5
15		12	0.02	1	0		Chen J	2012	...	SO	0	0	6.5
11		4	0.01	1	0		Macrae CA	2016	...	SO	0	0	1.5
3		3	0	1	0		Chen Q	2020	...	SO	0	0	-0.5
1		3	0	1	0		Armstronpb	2007	...	SO	0	0	-0.5
5		8	0	1	0		Chen N	2013	...	SO	0	0	-0.5
10		16	0.02	1	0		Kumar S	2007	...	SO	0	0	13.5
7		13	0	1	0		Chen H	2018	...	SO	0	0	2.5
1		6	0	1	0		Bouloubassi I	1999	...	SO	0	0	-0.5
1		6	0	1	0		Atkinson B	2004	...	SO	0	0	-0.5
6		5	0	1	0		Kumar P	2015	...	SO	0	0	1.5
2		1	0	1	0		Ambros V	2013	...	SO	0	0	-0.5
4		4	0	1	0		Berghmans S	2011	...	SO	0	0	2.5
1		5	0	1	0		Chery N	2000	...	SO	0	0	-0.5
3		12	0.01	1	0		Ho DH	2020	...	SO	0	0	-0.5
5		2	0	1	0		Dobin A	2021	...	SO	0	0	-0.5
2		11	0	1	0		Abbott BD	2000	...	SO	0	0	0.5
2		6	0	1	0		Madan A	2007	...	SO	0	0	-0.5
1		3	0	1	0		Juncueira VBC	1994	...	SO	0	0	-0.5
3		1	0	1	0		Mustafa SA	2016	...	SO	0	0	-0.5
5		16	0.01	1	0		Bunn HF	2000	...	SO	0	0	13.5
4		9	0.01	1	0		Brett JR	2001	...	SO	0	0	17.5
6		10	0	1	0		Li J	2012	...	SO	0	0	4.5
4		2	0	1	0		Asahara T	2014	...	SO	0	0	0.5
16		13	0.02	1	0		Li H	2015	...	SO	0	0	3.5
2		1	0	1	0		Li N	2022	...	SO	0	0	-0.5
2		7	0	1	0		Force A	2013	...	SO	0	0	-0.5
7		0	0	1	0		Li L	2017	...	SO	0	0	1.5
4		3	0	1	0		Feely RA	2019	...	SO	0	0	-0.5
5		1	0	1	0		Perrichon P	2019	...	SO	0	0	-0.5
3		1	0	1	0		Brown DR	2017	...	SO	0	0	-0.5
12		5	0	1	0		Li Z	2016	...	SO	0	0	0.5
6		15	0.01	1	0		Donelson JM	2020	...	SO	0	0	-0.5
1		4	0	1	0		Acierno R	2007	...	SO	0	0	-0.5
2		10	0	1	0		Malvin GM	2006	...	SO	0	0	-0.5
157		37	0.22	1	0		Kimmel CB	2003	...	SO	0	0	13.5
1		3	0	1	0		Segner H	1994	...	SO	0	0	-0.5
2		7	0	1	0		Beamish FWH	2010	...	SO	0	0	-0.5
1		8	0	1	0		Digregorio PJ	2001	...	SO	0	0	-0.5
2		5	0	1	0		Chabot D	2010	...	SO	0	0	-0.5
23		9	0.01	1	0		Lieschke GJ	2013	...	SO	0	0	5.5
3		9	0.02	1	0		Detrich HW	2001	...	SO	0	0	6.5
1		7	0	1	0		Blomqvist AG	1999	...	SO	0	0	-0.5
6		6	0	1	0		Li B	2018	...	SO	0	0	2.5
2		7	0	1	0		Walker MK	1999	...	SO	0	0	-0.5
51		43	0.08	1	0		Barrionuevo WR	2001	...	SO	0	0	14.5
1		3	0	1	0		Lovell RT	1994	...	SO	0	0	-0.5
4		3	0	1	0		Mueller CA	2017	...	SO	0	0	-0.5
2		4	0	1	0		Wyatt CN	2008	...	SO	0	0	-0.5
6		8	0	1	0		Dixson DL	2017	...	SO	0	0	1.5
4		0	0	1	0		Eltzschig HK	2021	...	SO	0	0	-0.5
3		4	0	1	0		Basu N	2005	...	SO	0	0	8.5
2		10	0	1	0		Jia XX	2006	...	SO	0	0	-0.5
1		5	0	1	0		Dawson P	1999	...	SO	0	0	-0.5
2		2	0	1	0		Page RDM	2009	...	SO	0	0	-0.5
2		2	0	1	0		Ahrenholz DW	2015	...	SO	0	0	-0.5
2		2	0	1	0		Egginton S	2014	...	SO	0	0	-0.5
1		5	0	1	0		Arras M	2007	...	SO	0	0	-0.5
6		5	0	1	0		Shakarchi K	2015	...	SO	0	0	0.5
1		20	0	1	0		Dabrowski K	1994	...	SO	0	0	-0.5
2		2	0	1	0		Ishibashi H	2013	...	SO	0	0	-0.5
3		6	0	1	0		Shen RJ	2013	...	SO	0	0	-0.5
5		3	0	1	0		Ellett F	2014	...	SO	0	0	0.5
1		4	0	1	0		Feller MB	2000	...	SO	0	0	-0.5
4		3	0	1	0		Simon MC	2016	...	SO	0	0	-0.5
2		14	0.02	1	0		Bauchat JR	2002	...	SO	0	0	2.5
4		5	0.01	1	0		Barriga EH	2016	...	SO	0	0	-0.5
3		3	0	1	0		Dahlke FT	2021	...	SO	0	0	-0.5
2		2	0	1	0		Taylor JS	2008	...	SO	0	0	-0.5
4		5	0.01	1	0		Gobler CJ	2019	...	SO	0	0	-0.5
2		13	0.02	1	0		*noaa	2004	...	SO	0	0	2.5
1		3	0	1	0		Voigt K	1995	...	SO	0	0	-0.5
1		7	0	1	0		Darlison MG	1999	...	SO	0	0	-0.5
1		8	0	1	0		Dillmann WH	2002	...	SO	0	0	-0.5
3		1	0	1	0		Koblitz L	2017	...	SO	0	0	-0.5
2		4	0	1	0		Denslow ND	2010	...	SO	0	0	-0.5
3		3	0	1	0		Langheinrich U	2013	...	SO	0	0	-0.5
3		5	0	1	0		Domenici P	2017	...	SO	0	0	-0.5
3		6	0	1	0		Rissanen E	2013	...	SO	0	0	-0.5
2		14	0.01	1	0		Barrans JD	2002	...	SO	0	0	0.5
1		7	0	1	0		Becerra J	2003	...	SO	0	0	-0.5
2		3	0	1	0		Martinovic D	2012	...	SO	0	0	-0.5
8		6	0.01	1	0		Chen Z	2014	...	SO	0	0	1.5
2		6	0	1	0		de Jong JLO	2009	...	SO	0	0	-0.5
2		4	0	1	0		Chen Y	2014	...	SO	0	0	-0.5
3		4	0	1	0		Jutfelt F	2017	...	SO	0	0	-0.5
3		5	0	1	0		Anders S	2020	...	SO	0	0	-0.5
3		2	0	1	0		Chen W	2020	...	SO	0	0	-0.5
7		4	0	1	0		Brown AR	2019	...	SO	0	0	1.5
3		2	0	1	0		Lai KP	2017	...	SO	0	0	-0.5
1		10	0	1	0		Bracci E	2000	...	SO	0	0	-0.5
1		7	0	1	0		Balasubramaniam A	1999	...	SO	0	0	-0.5
2		2	0	1	0		Poss KD	2008	...	SO	0	0	-0.5
2		11	0	1	0		Barneche DR	2022	...	SO	0	0	-0.5
3		5	0	1	0		Qi DL	2018	...	SO	0	0	-0.5
2		5	0	1	0		Chen TH	2013	...	SO	0	0	-0.5
3		7	0.01	1	0		Giacomin M	2020	...	SO	0	0	-0.5
2		0	0	1	0		Bellwood DR	2011	...	SO	0	0	-0.5
1		5	0	1	0		Chub N	2000	...	SO	0	0	-0.5
2		4	0	1	0		Plaut I	2012	...	SO	0	0	-0.5
3		1	0	1	0		Nagel R	2011	...	SO	0	0	-0.5
3		5	0	1	0		Choi J	2020	...	SO	0	0	-0.5
1		8	0	1	0		Clegg JS	2001	...	SO	0	0	-0.5
2		10	0	1	0		Nilsson S	2006	...	SO	0	0	-0.5
9		16	0.03	1	0		Boutilier RG	2003	...	SO	0	0	15.5
2		3	0	1	0		Chomczynski P	2010	...	SO	0	0	-0.5
2		8	0	1	0		Navarro-martin L	2022	...	SO	0	0	-0.5
1		4	0	1	0		Chiou CT	1995	...	SO	0	0	-0.5
1		5	0	1	0		Chuga CY	1999	...	SO	0	0	-0.5
6		6	0.01	1	0		Chandel NS	2016	...	SO	0	0	1.5
4		6	0	1	0		Federici G	2010	...	SO	0	0	2.5
3		1	0	1	0		Donnelly DF	2006	...	SO	0	0	-0.5
2		6	0	1	0		Dennis G	2009	...	SO	0	0	-0.5
2		3	0	1	0		Dorn GW	2011	...	SO	0	0	-0.5
3		1	0	1	0		Falcon J	2014	...	SO	0	0	-0.5
5		1	0	1	0		Wood CM	2021	...	SO	0	0	-0.5
1		8	0	1	0		Conover CA	2002	...	SO	0	0	-0.5
2		4	0	1	0		Kizaka-kondoh S	2022	...	SO	0	0	-0.5
3		1	0	1	0		Stenslokken KO	2016	...	SO	0	0	-0.5
24		10	0.03	1	0		Portner HO	2015	...	SO	0	0	3.5
8	3.57	10	0	1	0		Johnston MW	2015	...	SO	0	0	1.5
2		3	0	1	0		Lucitt MB	2009	...	SO	0	0	-0.5
2		4	0.01	1	0		Coultas L	2014	...	SO	0	0	-0.5
2		7	0	1	0		Jonsson B	2022	...	SO	0	0	-0.5
1		2	0	1	0		Boussat S	2003	...	SO	0	0	-0.5
6		11	0.01	1	0		Jud ZR	2016	...	SO	0	0	3.5
1		4	0	1	0		1998	2008	...	SO	0	0	-0.5
6		8	0	1	0		Jiang L	2016	...	SO	0	0	3.5
4		0	0	1	0		Kim D	2018	...	SO	0	0	-0.5
5		9	0.01	1	0		Lee S	2018	...	SO	0	0	-0.5
1		5	0	1	0		1996	1999	...	SO	0	0	-0.5
2		3	0	1	0		Cui L	2014	...	SO	0	0	-0.5
3		3	0	1	0		Jiang H	2018	...	SO	0	0	-0.5
1		4	0	1	0		1992	2008	...	SO	0	0	-0.5
3		5	0.01	1	0		Lee J	2019	...	SO	0	0	-0.5
1		5	0	1	0		Albertsson-wikland K	2005	...	SO	0	0	-0.5
1		7	0	1	0		Bartholow JM	2007	...	SO	0	0	-0.5
1		5	0	1	0		Beckers J	2001	...	SO	0	0	-0.5
2		10	0	1	0		Chen WT	2022	...	SO	0	0	-0.5
6		4	0	1	0		Angilletta MJ	2010	...	SO	0	0	7.5
1		3	0	1	0		Abbott A	2008	...	SO	0	0	-0.5
15	3.45	13	0	1	0		Qin Z	2013	...	SO	0	0	2.5
3		9	0.01	1	0		Kalueff AV	2018	...	SO	0	0	-0.5
2		14	0	1	0		Herold S	2008	...	SO	0	0	-0.5
4		1	0	1	0		Zhang C	2021	...	SO	0	0	-0.5
1		3	0	1	0		Miayi K	1994	...	SO	0	0	-0.5
3		8	0	1	0		Dalla VIAJ	2001	...	SO	0	0	4.5
6		2	0	1	0		Devlin RH	2013	...	SO	0	0	2.5
1		8	0	1	0		Eisen MB	2002	...	SO	0	0	-0.5
10		6	0	1	0		Zhang P	2014	...	SO	0	0	0.5
1		6	0	1	0		Adjei AA	2005	...	SO	0	0	-0.5
5		1	0	1	0		Zhang L	2020	...	SO	0	0	-0.5
3		5	0	1	0		Zhang M	2013	...	SO	0	0	-0.5
1		7	0	1	0		*nmfs	2007	...	SO	0	0	-0.5
4		2	0	1	0		Scholz S	2018	...	SO	0	0	-0.5
3		3	0	1	0		Chen XQ	2018	...	SO	0	0	-0.5
9		7	0	1	0		Cote IM	2012	...	SO	0	0	4.5
12		21	0.02	1	0		Clarke A	2017	...	SO	0	0	1.5
8	4.01	3	0	1	0		Gerri C	2020	...	SO	0	0	0.5
1		4	0	1	0		Halfon E	1995	...	SO	0	0	-0.5
2		5	0	1	0		Olsson AK	2012	...	SO	0	0	-0.5
2		17	0.01	1	0		Lefevre S	2022	...	SO	0	0	-0.5
1		5	0	1	0		Barke R	1999	...	SO	0	0	-0.5
1		4	0	1	0		Johnsen S	1995	...	SO	0	0	-0.5
2		6	0	1	0		Vandesompele J	2007	...	SO	0	0	-0.5
3		1	0	1	0		Dufour V	2017	...	SO	0	0	-0.5
50		45	0.1	1	0		Jonz MG	2006	...	SO	0	0	8.5
2		2	0	1	0		Cavas T	2022	...	SO	0	0	-0.5
1		5	0	1	0		Fan CM	2000	...	SO	0	0	-0.5
3		1	0	1	0		Rey S	2016	...	SO	0	0	-0.5
4		5	0	1	0		Curado S	2019	...	SO	0	0	-0.5
3		4	0	1	0		Randall D	2015	...	SO	0	0	-0.5
6		4	0	1	0		Jin YX	2019	...	SO	0	0	1.5
9		5	0	1	0		Lawrence C	2018	...	SO	0	0	0.5
3		1	0	1	0		Wang XL	2012	...	SO	0	0	-0.5
3		5	0	1	0		Ferrari MCO	2017	...	SO	0	0	-0.5
1		4	0	1	0		Davey BA	1995	...	SO	0	0	-0.5
1		3	0	1	0		Wershaw RL	1995	...	SO	0	0	-0.5
3		1	0	1	0		Chen YH	2016	...	SO	0	0	-0.5
3		14	0.01	1	0		Bradford CSAMUEL	2003	...	SO	0	0	0.5
7		5	0	1	0		Gonzalez C	2006	...	SO	0	0	-0.5
6		11	0	1	0		Cutz E	2006	...	SO	0	0	10.5
2		7	0	1	0		Motzer RJ	2009	...	SO	0	0	-0.5
2		10	0	1	0		Goniakowska-witalinska LUCYNA	2006	...	SO	0	0	-0.5
6		18	0.04	1	0		Fritsche R	2003	...	SO	0	0	5.5
1		8	0	1	0		Brismar K	2002	...	SO	0	0	-0.5
22		20	0.04	1	0		Albins MA	2012	...	SO	0	0	4.5
9		13	0	1	0		Chapman LJ	2005	...	SO	0	0	11.5
2		12	0	1	0		Elonen GE	1999	...	SO	0	0	-0.5
1		5	0	1	0		Bernier NJ	2003	...	SO	0	0	-0.5
2		4	0	1	0		Craft JA	2010	...	SO	0	0	-0.5
7	3.67	5	0	1	0		Smyth GK	2013	...	SO	0	0	1.5
4		9	0	1	0		Cao YH	2009	...	SO	0	0	0.5
6		4	0	1	0		Betancur-r R	2014	...	SO	0	0	4.5
9		2	0	1	0		Team RC	2017	...	SO	0	0	-0.5
4		7	0	1	0		**worldhealthorganization	2008	...	SO	0	0	10.5
2		6	0	1	0		Anttila K	2014	...	SO	0	0	-0.5
48		38	0.08	1	0		Nikinmaa M	2005	...	SO	0	0	9.5
4		0	0	1	0		Wang YF	2020	...	SO	0	0	-0.5
2		1	0	1	0		Hogstrand C	2008	...	SO	0	0	-0.5
1		8	0	1	0		Donovan SM	2002	...	SO	0	0	-0.5
1		2	0	1	0		de Beer G	1999	...	SO	0	0	-0.5
5		3	0	1	0		Ipcc	2017	...	SO	0	0	-0.5
3		3	0	1	0		Braga MM	2019	...	SO	0	0	-0.5
8		5	0	1	0		Chablais F	2013	...	SO	0	0	5.5
4		1	0	1	0		Vallone D	2021	...	SO	0	0	-0.5
4		15	0.05	1	0		*iso	2005	...	SO	0	0	12.5
2		11	0	1	0		Sun YJ	2008	...	SO	0	0	-0.5
3		1	0	1	0		Goda N	2017	...	SO	0	0	-0.5
2		7	0	1	0		Weber RE	2006	...	SO	0	0	-0.5
3		5	0	1	0		Steenbergen PJ	2013	...	SO	0	0	-0.5
1		3	0	1	0		Berghard A	2005	...	SO	0	0	-0.5
2		12	0	1	0		Andreasen EA	2003	...	SO	0	0	0.5
1		5	0	1	0		Bray S	2001	...	SO	0	0	-0.5
2		5	0	1	0		Prasch AL	2008	...	SO	0	0	-0.5
1		4	0	1	0		Boos S	2000	...	SO	0	0	-0.5
1		2	0	1	0		Borg B	2005	...	SO	0	0	-0.5
5		15	0.04	1	0		Amores A	1999	...	SO	0	0	8.5
10	3.64	4	0	1	0		Munday PL	2016	...	SO	0	0	2.5
6		4	0.01	1	0		Chen LG	2019	...	SO	0	0	1.5
1		9	0	1	0		Boue-grabot E	2003	...	SO	0	0	-0.5
2		4	0	1	0		Lovern SB	2009	...	SO	0	0	-0.5
2		2	0	1	0		Gray C	2013	...	SO	0	0	-0.5
1		8	0	1	0		Cotterill AM	2002	...	SO	0	0	-0.5
3		4	0	1	0		Kiyose K	2018	...	SO	0	0	-0.5
4		2	0	1	0		Wilson C	2021	...	SO	0	0	-0.5
2		3	0	1	0		An WG	2011	...	SO	0	0	-0.5
3		4	0	1	0		Jeppesen E	2019	...	SO	0	0	-0.5
3		2	0	1	0		Mu XY	2021	...	SO	0	0	-0.5
2		5	0	1	0		Bar-ilan O	2012	...	SO	0	0	-0.5
1		6	0	1	0		Borkovich KA	2004	...	SO	0	0	-0.5
3		1	0	1	0		Pugh CW	2015	...	SO	0	0	-0.5
2		3	0	1	0		Milligan CL	2009	...	SO	0	0	-0.5
3		5	0	1	0		Cazenave J	2019	...	SO	0	0	-0.5
2		0	0	1	0		Granato M	2000	...	SO	0	0	-0.5
3		2	0	1	0		Brauner CJ	2021	...	SO	0	0	-0.5
7		12	0.01	1	0		Feder ME	2012	...	SO	0	0	0.5
1		5	0	1	0		Denison MS	2000	...	SO	0	0	-0.5
3		0	0	1	0		Gonzalez P	2010	...	SO	0	0	-0.5
4		3	0	1	0		Hu CJ	2015	...	SO	0	0	-0.5
12		20	0.04	1	0		Altschul SF	2004	...	SO	0	0	10.5
16		23	0.05	1	0		Abdallah SJ	2014	...	SO	0	0	5.5
1		5	0	1	0		Bettenhausen B	2001	...	SO	0	0	-0.5
7		22	0.01	1	0		Bailly Y	2003	...	SO	0	0	6.5
3		4	0	1	0		Bellot G	2018	...	SO	0	0	-0.5
3		3	0	1	0		Weger BD	2014	...	SO	0	0	-0.5
3		4	0.01	1	0		Runnalls TJ	2018	...	SO	0	0	-0.5
7		5	0	1	0		Kwong RWM	2016	...	SO	0	0	-0.5
3		3	0	1	0		Du J	2020	...	SO	0	0	-0.5
23		18	0.04	1	0		Carmeliet P	2009	...	SO	0	0	5.5
1		4	0	1	0		Aubin-horth N	2007	...	SO	0	0	-0.5
7	3.69	2	0	1	0		Iso	2017	...	SO	0	0	0.5
2		5	0	1	0		Navarro E	2012	...	SO	0	0	-0.5
1		9	0	1	0		Cary GA	1995	...	SO	0	0	-0.5
2		3	0	1	0		Paffett-lugassy N	2009	...	SO	0	0	-0.5
1		3	0	1	0		Stewart AJ	1995	...	SO	0	0	-0.5
1		3	0	1	0		Abramov I	2004	...	SO	0	0	-0.5
2		2	0	1	0		Chu CY	2010	...	SO	0	0	-0.5
1		6	0	1	0		Blaxter JHS	2005	...	SO	0	0	-0.5
3		3	0	1	0		Tamura K	2013	...	SO	0	0	-0.5
1		3	0	1	0		Boesch ST	2004	...	SO	0	0	-0.5
1		5	0	1	0		Benton MJ	2004	...	SO	0	0	-0.5
3		6	0	1	0		Guzy RD	2020	...	SO	0	0	-0.5
1		3	0	1	0		Boone AN	2005	...	SO	0	0	-0.5
15		6	0.01	1	0		Benjamini Y	2013	...	SO	0	0	3.5
3		3	0	1	0		Hall C	2019	...	SO	0	0	-0.5
42		49	0.12	1	0		Burggren WW	1999	...	SO	0	0	16.5
2		4	0	1	0		Halliwell B	2013	...	SO	0	0	-0.5
26		25	0.04	1	0		Rombough P	2004	...	SO	0	0	15.5
1		5	0	1	0		Abuzzahab MJ	2005	...	SO	0	0	-0.5
1		9	0	1	0		Cazalets JR	2000	...	SO	0	0	-0.5
1		6	0.01	1	0		*epa	2008	...	SO	0	0	-0.5
9		8	0	1	0		Majmundar AJ	2016	...	SO	0	0	3.5
3		5	0.01	1	0		Conesa A	2018	...	SO	0	0	-0.5
3		2	0	1	0		Tang N	2015	...	SO	0	0	-0.5
3		4	0	1	0		Mcdonald DG	2016	...	SO	0	0	-0.5
1		6	0	1	0		*sas I	2004	...	SO	0	0	-0.5
3		0	0	1	0		Solaini G	2016	...	SO	0	0	-0.5
4		8	0.01	1	0		Liang D	2003	...	SO	0	0	8.5
3		3	0	1	0		Glasauer SMK	2020	...	SO	0	0	-0.5
2		7	0	1	0		Helder T	1999	...	SO	0	0	-0.5
5		4	0	1	0		George S	2010	...	SO	0	0	5.5
2		6	0	1	0		Bairoch A	2009	...	SO	0	0	-0.5
3		3	0.01	1	0		Froese R	2020	...	SO	0	0	-0.5
2		4	0	1	0		Braun MH	2010	...	SO	0	0	-0.5
1		6	0	1	0		Arad Z	2004	...	SO	0	0	-0.5
7		15	0.02	1	0		Zaccone G	2006	...	SO	0	0	8.5
2		4	0	1	0		Burleson MARKL	2006	...	SO	0	0	-0.5
8		5	0	1	0		Harris AL	2013	...	SO	0	0	0.5
47		15	0.02	1	0		Livak KJ	2011	...	SO	0	0	6.5
2		1	0	1	0		Solnicakrezel L	2008	...	SO	0	0	-0.5
2		6	0	1	0		Altimiras J	2006	...	SO	0	0	-0.5
2		6	0.01	1	0		2007	2009	...	SO	0	0	-0.5
2		4	0	1	0		Lin HF	2009	...	SO	0	0	-0.5
1		10	0	1	0		Bernhardt RR	2000	...	SO	0	0	-0.5
2		4	0.01	1	0		Epting D	2011	...	SO	0	0	-0.5
1		4	0	1	0		Atkinson AC	2001	...	SO	0	0	-0.5
3		1	0	1	0		Sih A	2015	...	SO	0	0	-0.5
1		9	0	1	0		Buckley K	2003	...	SO	0	0	-0.5
42		22	0.02	1	0		Pelster B	2002	...	SO	0	0	12.5
3		0	0	1	0		Bizuayehu TT	2017	...	SO	0	0	-0.5
2		4	0	1	0		Blazquez M	2011	...	SO	0	0	-0.5
5		9	0	1	0		Boutin AT	2009	...	SO	0	0	0.5
3		7	0	1	0		Heuer RM	2020	...	SO	0	0	-0.5
4		10	0.02	1	0		Filby AL	2010	...	SO	0	0	0.5
1		5	0	1	0		Deftos ML	2001	...	SO	0	0	-0.5
4		1	0	1	0		Vanderplancke G	2017	...	SO	0	0	-0.5
3		3	0	1	0		Andradi-brown DA	2017	...	SO	0	0	-0.5
3		2	0	1	0		Eddy C	2019	...	SO	0	0	-0.5
8		12	0.01	1	0		Love MI	2019	...	SO	0	0	1.5
1		3	0	1	0		Bryant PL	2001	...	SO	0	0	-0.5
1		8	0	1	0		Douglas RM	2001	...	SO	0	0	-0.5
3		2	0	1	0		Keith B	2015	...	SO	0	0	-0.5
6		7	0.01	1	0		Beis D	2010	...	SO	0	0	7.5
1		3	0	1	0		Baba T	2007	...	SO	0	0	-0.5
2		3	0	1	0		Azuma K	2011	...	SO	0	0	-0.5
4		2	0	1	0		Nusslein-volhard C	2019	...	SO	0	0	-0.5
1		6	0	1	0		Brett J	2001	...	SO	0	0	-0.5
1		21	0	1	0		Bollobas B	1995	...	SO	0	0	-0.5
1		7	0	1	0		Cardinaud B	1999	...	SO	0	0	-0.5
20		13	0.01	1	0		Bagatto B	2009	...	SO	0	0	4.5
1		4	0	1	0		Hassett JP	1995	...	SO	0	0	-0.5
1		4	0	1	0		Goodrich MS	1995	...	SO	0	0	-0.5
8		10	0	1	0		Holeton GF	2006	...	SO	0	0	9.5
3		12	0	1	0		Awenius C	2004	...	SO	0	0	1.5
1		3	0	1	0		Agrawal AA	2005	...	SO	0	0	-0.5
4		3	0	1	0		Schulte PM	2019	...	SO	0	0	-0.5
2		6	0	1	0		Fitzgibbon QP	2010	...	SO	0	0	-0.5
1		5	0	1	0		Burnison BK	1999	...	SO	0	0	-0.5
1		3	0	1	0		Plaa GL	1994	...	SO	0	0	-0.5
1		5	0	1	0		Drapeau P	2000	...	SO	0	0	-0.5
2		3	0	1	0		Ron D	2022	...	SO	0	0	-0.5
1		8	0	1	0		Clementi E	2001	...	SO	0	0	-0.5
6		5	0.01	1	0		Nicoli S	2009	...	SO	0	0	5.5
1		20	0	1	0		Baglio CM	1994	...	SO	0	0	-0.5
3		2	0	1	0		Matson CW	2015	...	SO	0	0	-0.5
2		6	0	1	0		Pescador N	2012	...	SO	0	0	-0.5
1		6	0	1	0		Christiansen JS	2001	...	SO	0	0	-0.5
2		7	0	1	0		Ordway GA	2009	...	SO	0	0	-0.5
1		0	0	1	0		Andjus RK	2007	...	SO	0	0	-0.5
3		1	0	1	0		Ribas L	2022	...	SO	0	0	-0.5
4		9	0.01	1	0		Aprelikova O	2012	...	SO	0	0	5.5
3		6	0	1	0		Wittenberg JB	2011	...	SO	0	0	-0.5
3		2	0	1	0		Aragones J	2020	...	SO	0	0	-0.5
3		0	0	1	0		Lin CY	2016	...	SO	0	0	-0.5
1		9	0	1	0		Bradley SR	2003	...	SO	0	0	-0.5
11		7	0.01	1	0		Lushchak VI	2009	...	SO	0	0	9.5
3		0	0	1	0		Gou X	2017	...	SO	0	0	-0.5
14		17	0.05	1	0		Evans DH	2000	...	SO	0	0	19.5
1		3	0	1	0		Bardet PL	2007	...	SO	0	0	-0.5
1		5	0	1	0		Ema M	2000	...	SO	0	0	-0.5
1		7	0	1	0		Akimenko MA	2003	...	SO	0	0	-0.5
1		9	0	1	0		Adriaensen D	2003	...	SO	0	0	-0.5
3		4	0	1	0		Velisek J	2018	...	SO	0	0	-0.5
2		2	0	1	0		Dewhirst MW	2010	...	SO	0	0	-0.5
3		5	0	1	0		Du SNN	2019	...	SO	0	0	-0.5
2		6	0	1	0		Peffy SF	2006	...	SO	0	0	-0.5
2		7	0	1	0		Henry TR	1999	...	SO	0	0	-0.5
6		9	0.01	1	0		Best C	2019	...	SO	0	0	0.5
3		10	0.02	1	0		*oecd	1999	...	SO	0	0	6.5
3		5	0	1	0		Caldeira K	2019	...	SO	0	0	-0.5
1		9	0	1	0		Delaiglesia F	1994	...	SO	0	0	-0.5
6		13	0.01	1	0		Long Y	2019	...	SO	0	0	-0.5
1		3	0	1	0		Baumann R	2003	...	SO	0	0	-0.5
3		5	0.01	1	0		Cao FJ	2021	...	SO	0	0	-0.5
1		4	0	1	0		Chen JAU-NIAN	1999	...	SO	0	0	-0.5
2		3	0	1	0		Trede NS	2008	...	SO	0	0	-0.5
2		3	0	1	0		Dang CV	2009	...	SO	0	0	-0.5
3		2	0	1	0		Raval RR	2015	...	SO	0	0	-0.5
3		3	0	1	0		Killen SS	2019	...	SO	0	0	-0.5
2		3	0	1	0		Arthur PG	2009	...	SO	0	0	-0.5
7		8	0	1	0		Pan YK	2021	...	SO	0	0	-0.5
7	3.76	2	0	1	0		R DEVELOPMENTCORETEAM	2018	...	SO	0	0	0.5
2		7	0.01	1	0		Sanders BM	2005	...	SO	0	0	-0.5
3		4	0	1	0		Dimitriadi A	2021	...	SO	0	0	-0.5
10		14	0.03	1	0		Lopez-olmeda JF	2012	...	SO	0	0	4.5
2		11	0	1	0		Wakasugi K	2008	...	SO	0	0	-0.5
3		2	0	1	0		Gerhardt H	2011	...	SO	0	0	-0.5
3		1	0	1	0		Hadfield JD	2019	...	SO	0	0	-0.5
2		2	0	1	0		Gariano RF	2010	...	SO	0	0	-0.5
2		7	0	1	0		Heil M	2007	...	SO	0	0	-0.5
3		3	0.01	1	0		Fang Y	2020	...	SO	0	0	-0.5
1		4	0	1	0		Ashburner M	2007	...	SO	0	0	-0.5
1		21	0	1	0		Bruggemann R	1995	...	SO	0	0	-0.5
2		5	0	1	0		Werner I	2007	...	SO	0	0	-0.5
3		17	0.01	1	0		Abnet CC	2000	...	SO	0	0	0.5
3		2	0	1	0		Brand MD	2019	...	SO	0	0	-0.5
1		5	0	1	0		Corton JC	2000	...	SO	0	0	-0.5
2		2	0	1	0		Anthony KRN	2014	...	SO	0	0	-0.5
1		5	0	1	0		*eur COMM	1999	...	SO	0	0	-0.5
3		4	0	1	0		Chen JN	2010	...	SO	0	0	-0.5
3		2	0	1	0		Chen JM	2020	...	SO	0	0	-0.5
1		7	0	1	0		Baum O	2007	...	SO	0	0	-0.5
1		2	0	1	0		Dusseau JW	2002	...	SO	0	0	-0.5
5		7	0.01	1	0		Chen JH	2014	...	SO	0	0	-0.5
2		4	0	1	0		Kanehisa M	2009	...	SO	0	0	-0.5
1		3	0	1	0		Randic M	1995	...	SO	0	0	-0.5
3		2	0	1	0		Vatine G	2014	...	SO	0	0	-0.5
2		4	0	1	0		Lindeman LC	2022	...	SO	0	0	-0.5
4		1	0	1	0		Wickham H	2020	...	SO	0	0	-0.5
137		65	0.23	1	0		Semenza GL	2001	...	SO	0	0	14.5
13		13	0	1	0		Rees BB	2005	...	SO	0	0	4.5
1		4	0	1	0		Burggren WWTP	1999	...	SO	0	0	-0.5
4		17	0.02	1	0		Das T	2010	...	SO	0	0	11.5
3		3	0	1	0		Hixon MA	2019	...	SO	0	0	-0.5
2		7	0.01	1	0		Dickerson RE	2011	...	SO	0	0	-0.5
1		8	0	1	0		Del GIACCOL	2002	...	SO	0	0	-0.5
6		9	0	1	0		Olson KR	2014	...	SO	0	0	1.5
1		7	0	1	0		Andreola F	2003	...	SO	0	0	-0.5
2		4	0	1	0		Fishelson L	2012	...	SO	0	0	-0.5
3		2	0	1	0		Buckler KJ	2017	...	SO	0	0	-0.5
4		3	0	1	0		Ferreira CEL	2019	...	SO	0	0	-0.5
3		3	0	1	0		**internationalorganizationforstandardization	2021	...	SO	0	0	-0.5
1		7	0	1	0		Becksickinger AG	1999	...	SO	0	0	-0.5
2		6	0	1	0		Ju ZL	2009	...	SO	0	0	-0.5
1		5	0	1	0		Cherubini E	2000	...	SO	0	0	-0.5
2		4	0	1	0		Barucca M	2010	...	SO	0	0	-0.5
3		2	0	1	0		Hu Y	2021	...	SO	0	0	-0.5
1		9	0	1	0		Angelo S	2002	...	SO	0	0	-0.5
3		1	0	1	0		Gottschalk F	2016	...	SO	0	0	-0.5
4		3	0.01	1	0		Becker CD	2020	...	SO	0	0	-0.5
3		5	0	1	0		Saltys HA	2016	...	SO	0	0	-0.5
2		6	0	1	0		Grillitsch S	2010	...	SO	0	0	-0.5
2		3	0	1	0		Lee HC	2022	...	SO	0	0	-0.5
3		4	0	1	0		Liao Y	2021	...	SO	0	0	-0.5
5		11	0	1	0		Gamperl AK	2009	...	SO	0	0	1.5
2		6	0	1	0		Diotel N	2011	...	SO	0	0	-0.5
2		5	0.01	1	0		Dong W	2011	...	SO	0	0	-0.5
2		4	0	1	0		Gustafsson MV	2013	...	SO	0	0	-0.5
4		14	0	1	0		Reuss S	2006	...	SO	0	0	1.5
3		2	0	1	0		Mi HY	2018	...	SO	0	0	-0.5
3		4	0	1	0		Finn RN	2017	...	SO	0	0	-0.5
3		5	0	1	0		Dejours P	2021	...	SO	0	0	-0.5
1		0	0	1	0		Anderson KV	2004	...	SO	0	0	-0.5
5		1	0	1	0		Cheng JP	2012	...	SO	0	0	3.5
9		14	0	1	0		Green SJ	2012	...	SO	0	0	3.5
2		4	0	1	0		Powell FL	2006	...	SO	0	0	-0.5
2		0	0	1	0		Bhattacharya S	2009	...	SO	0	0	-0.5
3		7	0.01	1	0		Jeronimo R	2021	...	SO	0	0	-0.5
1		3	0	1	0		Ansari BA	2005	...	SO	0	0	-0.5
22		44	0.07	1	0		Bickler PE	2008	...	SO	0	0	8.5
2		5	0	1	0		Hendon LA	2008	...	SO	0	0	-0.5
2		4	0	1	0		Nystul TG	2008	...	SO	0	0	-0.5
3		1	0	1	0		Lee JS	2018	...	SO	0	0	-0.5
3		2	0	1	0		Metelo AM	2016	...	SO	0	0	-0.5
3		3	0	1	0		Jung HS	2020	...	SO	0	0	-0.5
1		3	0	1	0		Branchek T	2004	...	SO	0	0	-0.5
3		2	0	1	0		Casey JR	2020	...	SO	0	0	-0.5
1		4	0	1	0		Deplano M	1994	...	SO	0	0	-0.5
3		6	0	1	0		Levesque KD	2021	...	SO	0	0	-0.5
1		4	0	1	0		Barrett T	2007	...	SO	0	0	-0.5
1		3	0	1	0		*us EPA	2005	...	SO	0	0	-0.5
5		5	0	1	0		Rahman MS	2012	...	SO	0	0	2.5
2		2	0	1	0		Iwamatsu T	2009	...	SO	0	0	-0.5
1		3	0	1	0		Barth AL	2005	...	SO	0	0	-0.5
1		3	0	1	0		Leversee GJ	1995	...	SO	0	0	-0.5
7		13	0.01	1	0		Lopez-barneo J	2006	...	SO	0	0	10.5
5		21	0.08	1	0		Braunbeck T	1994	...	SO	0	0	26.5
1		2	0	1	0		Conroy G	2000	...	SO	0	0	-0.5
18		9	0.01	1	0		Thisse C	2011	...	SO	0	0	6.5
2		4	0	1	0		Jiang BH	2012	...	SO	0	0	-0.5
1		8	0	1	0		Evans SM	2002	...	SO	0	0	-0.5
3		1	0	1	0		Guindon S	2012	...	SO	0	0	-0.5
9		12	0.04	1	0		Handy RD	2013	...	SO	0	0	2.5
2		6	0	1	0		Reid SG	2006	...	SO	0	0	-0.5
1		0	0	1	0		Aaron EA	2006	...	SO	0	0	-0.5
1		9	0	1	0		Brouns I	2003	...	SO	0	0	-0.5
2		1	0	1	0		Cripps IL	2014	...	SO	0	0	-0.5
2		12	0	1	0		Cantrell SM	1999	...	SO	0	0	-0.5
2		2	0	1	0		Trevarrow B	2006	...	SO	0	0	-0.5
5		4	0	1	0		Cossins AR	2011	...	SO	0	0	4.5
1		3	0	1	0		Oikari A	1995	...	SO	0	0	-0.5
1		10	0	1	0		Buss RR	2000	...	SO	0	0	-0.5
5		9	0	1	0		Landry CA	2012	...	SO	0	0	4.5
3		0	0	1	0		Yuan J	2015	...	SO	0	0	-0.5
2		1	0	1	0		Evans TG	2011	...	SO	0	0	-0.5
3		6	0	1	0		Soffker M	2018	...	SO	0	0	-0.5
2		5	0.01	1	0		Fraysse B	2013	...	SO	0	0	-0.5
1		4	0	1	0		Hartroft WS	1994	...	SO	0	0	-0.5
1		7	0	1	0		Beier DR	1999	...	SO	0	0	-0.5
3		10	0	1	0		Duan CM	2002	...	SO	0	0	8.5
2		10	0	1	0		Straus C	2006	...	SO	0	0	-0.5
8		11	0	1	0		Ivan M	2012	...	SO	0	0	3.5
2		3	0	1	0		Delorenzo ME	2014	...	SO	0	0	-0.5
1		4	0	1	0		Draper BW	2002	...	SO	0	0	-0.5
4		8	0	1	0		Lahiri S	2006	...	SO	0	0	1.5
1		3	0	1	0		Landrum PF	1995	...	SO	0	0	-0.5
2		3	0	1	0		Park JS	2022	...	SO	0	0	-0.5
2		3	0.01	1	0		Cahill GM	2014	...	SO	0	0	-0.5
3		2	0	1	0		Lin YC	2021	...	SO	0	0	-0.5
1		3	0	1	0		Aluru N	2005	...	SO	0	0	-0.5
1		3	0	1	0		Steinberg CEW	1995	...	SO	0	0	-0.5
3		6	0	1	0		Benita Y	2015	...	SO	0	0	-0.5
1		3	0	1	0		Aparicio S	2005	...	SO	0	0	-0.5
2		3	0	1	0		Ferno A	2013	...	SO	0	0	-0.5
3		3	0	1	0		Appelhoff RJ	2007	...	SO	0	0	7.5
3		1	0	1	0		Nunes P	2021	...	SO	0	0	-0.5
3		4	0	1	0		Schlueter PJ	2011	...	SO	0	0	-0.5
3		8	0	1	0		Burggren WARREN	2020	...	SO	0	0	-0.5
5		6	0	1	0		Zachar PC	2021	...	SO	0	0	-0.5
54		35	0.06	1	0		Perry SF	2004	...	SO	0	0	11.5
6		7	0	1	0		Fao	2019	...	SO	0	0	1.5
4		4	0	1	0		Guderley H	2019	...	SO	0	0	-0.5
3		2	0	1	0		Griffitt RJ	2016	...	SO	0	0	-0.5
3		3	0	1	0		Sparrow DB	2013	...	SO	0	0	-0.5
1		4	0	1	0		Badorff C	2002	...	SO	0	0	-0.5
5		10	0.01	1	0		Huang Y	2018	...	SO	0	0	-0.5
6		2	0	1	0		Zimmer AM	2021	...	SO	0	0	-0.5
3		3	0	1	0		Kramer DL	2015	...	SO	0	0	-0.5
1		8	0	1	0		Amellem O	2001	...	SO	0	0	-0.5
2		4	0.01	1	0		Fleming A	2014	...	SO	0	0	-0.5
1		6	0	1	0		*jand SCISOFTW	1999	...	SO	0	0	-0.5
1		3	0	1	0		Alam MK	2005	...	SO	0	0	-0.5
2		10	0	1	0		Minnich B	2006	...	SO	0	0	-0.5
12		10	0.02	1	0		Huang DW	2014	...	SO	0	0	4.5
10		8	0.01	1	0		Hwang PP	2011	...	SO	0	0	7.5
1		4	0	1	0		Hanke W	1994	...	SO	0	0	-0.5
3		4	0	1	0		Faught E	2020	...	SO	0	0	-0.5
4		4	0	1	0		Bilotta J	2004	...	SO	0	0	15.5
4		1	0	1	0		Little AG	2021	...	SO	0	0	-0.5
1		6	0	1	0		Belay T	2004	...	SO	0	0	-0.5
1		8	0	1	0		Derisi JL	2002	...	SO	0	0	-0.5
11	5.99	3	0	1	0		Santhakumar K	2015	...	SO	0	0	-0.5
4		8	0	1	0		Bahary N	2012	...	SO	0	0	0.5
3		5	0	1	0		Frazer TK	2017	...	SO	0	0	-0.5
4		10	0.01	1	0		Gassmann M	2003	...	SO	0	0	7.5
1		9	0	1	0		Bettexgalland M	2003	...	SO	0	0	-0.5
2		7	0	1	0		Coble DANIELW	2011	...	SO	0	0	-0.5
3		1	0	1	0		Cheng SH	2009	...	SO	0	0	-0.5
1		7	0	1	0		Asano Y	2007	...	SO	0	0	-0.5
5		0	0	1	0		Stackley KD	2021	...	SO	0	0	-0.5
3		5	0	1	0		Regan KS	2016	...	SO	0	0	-0.5
2		5	0	1	0		Affonso EG	2011	...	SO	0	0	-0.5
3		1	0	1	0		Li MH	2018	...	SO	0	0	-0.5
1		6	0	1	0		Billiard SM	2005	...	SO	0	0	-0.5
3		2	0	1	0		Fong GH	2016	...	SO	0	0	-0.5
7	3.99	8	0	1	0		Weinstein BM	2003	...	SO	0	0	3.5
3		4	0	1	0		Grabherr MG	2015	...	SO	0	0	-0.5
2		4	0	1	0		Arenzana FJ	2010	...	SO	0	0	-0.5
3		3	0	1	0		Bianchini K	2017	...	SO	0	0	-0.5
1		5	0	1	0		Bischoff FR	2003	...	SO	0	0	-0.5
1		5	0	1	0		Drutel G	2000	...	SO	0	0	-0.5
6		12	0.01	1	0		Bolger AM	2018	...	SO	0	0	1.5
1		3	0	1	0		Adair TH	2003	...	SO	0	0	-0.5
5		8	0	1	0		Zhu XS	2008	...	SO	0	0	4.5
18		16	0.02	1	0		Elks PM	2012	...	SO	0	0	6.5
3		0	0	1	0		Peng J	2015	...	SO	0	0	-0.5
27		21	0.02	1	0		Robertson CE	2015	...	SO	0	0	3.5
1		6	0	1	0		Bao HF	2007	...	SO	0	0	-0.5
1		3	0	1	0		Alarid ET	2007	...	SO	0	0	-0.5
3		6	0	1	0		Wu YC	2018	...	SO	0	0	-0.5
2		2	0	1	0		Holmstrup M	2013	...	SO	0	0	-0.5
1		6	0	1	0		Bosch TCG	2004	...	SO	0	0	-0.5
1		9	0	1	0		Argentin S	2002	...	SO	0	0	-0.5
3		19	0.02	1	0		Benjamin IJ	2002	...	SO	0	0	0.5
2		2	0	1	0		Zhu SQ	2008	...	SO	0	0	-0.5
3		4	0	1	0		Brette F	2019	...	SO	0	0	-0.5
3		4	0	1	0		Feng P	2020	...	SO	0	0	-0.5
4		4	0.01	1	0		Zucchi S	2018	...	SO	0	0	-0.5
6		9	0	1	0		Kimball ME	2015	...	SO	0	0	0.5
6		12	0.02	1	0		Alsop D	2019	...	SO	0	0	1.5
3		4	0	1	0		Chevalier A	2020	...	SO	0	0	-0.5
2		1	0	1	0		Braat AK	2011	...	SO	0	0	-0.5
3		8	0	1	0		Feng X	2018	...	SO	0	0	-0.5
2		7	0	1	0		Gauda EB	2013	...	SO	0	0	-0.5
1		2	0	1	0		Chang WJ	2000	...	SO	0	0	-0.5
3		0	0	1	0		Huang HY	2016	...	SO	0	0	-0.5
2		3	0	1	0		Gu YZ	2012	...	SO	0	0	-0.5
2		6	0.02	1	0		Driever W	2000	...	SO	0	0	1.5
2		1	0	1	0		Laale HW	2006	...	SO	0	0	-0.5
1		7	0	1	0		Arvidsson AK	1999	...	SO	0	0	-0.5
2		6	0	1	0		Mitchell GS	2006	...	SO	0	0	-0.5
3		2	0	1	0		Van DEROOSTR	2018	...	SO	0	0	-0.5
2		0	0	1	0		Almeida-val VMF	2015	...	SO	0	0	-0.5
2		2	0	1	0		Gerhard GS	2013	...	SO	0	0	-0.5
4		1	0	1	0		Tzaneva V	2016	...	SO	0	0	-0.5
5		13	0	1	0		Coolidge EH	2013	...	SO	0	0	7.5
20		17	0.02	1	0		Incardona JP	2008	...	SO	0	0	10.5
3		0	0	1	0		Vandenberg LN	2015	...	SO	0	0	-0.5
2		2	0	1	0		Feitsma H	2013	...	SO	0	0	-0.5
2		7	0	1	0		Hillegass JM	2013	...	SO	0	0	-0.5
3		5	0	1	0		Gorlach A	2020	...	SO	0	0	-0.5
1		6	0	1	0		Davison W	2001	...	SO	0	0	-0.5
6		6	0.01	1	0		Lesser MP	2017	...	SO	0	0	1.5
4		3	0	1	0		Luo WB	2020	...	SO	0	0	-0.5
15		13	0.02	1	0		Hill AJ	2012	...	SO	0	0	5.5
10		13	0.01	1	0		Nurse CA	2015	...	SO	0	0	1.5
2		7	0.01	1	0		Andrade TS	2018	...	SO	0	0	-0.5
7	3.49	3	0	1	0		Mckenzie DJ	2014	...	SO	0	0	1.5
5		3	0	1	0		Wenger RH	2013	...	SO	0	0	-0.5
6		5	0	1	0		Hallare AV	2015	...	SO	0	0	5.5
1		8	0	1	0		Baxter RC	2002	...	SO	0	0	-0.5
131		44	0.18	1	0		Westerfield M	1999	...	SO	0	0	16.5
3		1	0	1	0		Val AL	2015	...	SO	0	0	-0.5
2		0	0	1	0		Grunwald DJ	2006	...	SO	0	0	-0.5
26		25	0.01	1	0		Dunelerb S	2006	...	SO	0	0	8.5
6		1	0	1	0		Kwan KM	2012	...	SO	0	0	8.5
2		6	0	1	0		Glickman NS	2013	...	SO	0	0	-0.5
2		6	0.01	1	0		Politis SN	2022	...	SO	0	0	-0.5
1		5	0	1	0		*din	1999	...	SO	0	0	-0.5
1		2	0	1	0		Balthazart J	2005	...	SO	0	0	-0.5
2		4	0	1	0		Fradette C	2014	...	SO	0	0	-0.5
3		1	0	1	0		Loenarz C	2015	...	SO	0	0	-0.5
3		2	0	1	0		Huang LE	2016	...	SO	0	0	-0.5
1		5	0	1	0		Blanchetot A	2004	...	SO	0	0	-0.5
5		2	0	1	0		Claiborne JB	2014	...	SO	0	0	2.5
4		1	0	1	0		Bonga SEW	2020	...	SO	0	0	-0.5
1		4	0	1	0		Gluth G	1994	...	SO	0	0	-0.5
4		1	0	1	0		Rouhi P	2015	...	SO	0	0	-0.5
1		2	0	1	0		Bass AH	2005	...	SO	0	0	-0.5
1		3	0	1	0		Tucker BW	1994	...	SO	0	0	-0.5
2		8	0	1	0		Flogel U	2009	...	SO	0	0	-0.5
3		1	0	1	0		Embry MR	2017	...	SO	0	0	-0.5
7		4	0	1	0		Thomas P	2011	...	SO	0	0	5.5
3		3	0	1	0		Jobling S	2018	...	SO	0	0	-0.5

## Sheet: keyword burstness
Top 15 Keywords with the Strongest Citation Bursts
Keywords	Year	Strength	Begin	End	1994 - 2022
temperature	1994	6.81	2019	2022	▂▂▂▂▂▂▂▂▂▂▂▂▂▂▂▂▂▂▂▂▂▂▂▂▂▃▃▃▃
embryonic development	1994	5.5	2016	2019	▂▂▂▂▂▂▂▂▂▂▂▂▂▂▂▂▂▂▂▂▂▂▃▃▃▃▂▂▂
in vivo	1994	4.78	2009	2013	▂▂▂▂▂▂▂▂▂▂▂▂▂▂▂▃▃▃▃▃▂▂▂▂▂▂▂▂▂
danio rerio	1994	4.74	2002	2006	▂▂▂▂▂▂▂▂▃▃▃▃▃▂▂▂▂▂▂▂▂▂▂▂▂▂▂▂▂
differentiation	1994	4.61	2013	2016	▂▂▂▂▂▂▂▂▂▂▂▂▂▂▂▂▂▂▂▃▃▃▃▂▂▂▂▂▂
pharmaceutical	1994	4.37	2019	2020	▂▂▂▂▂▂▂▂▂▂▂▂▂▂▂▂▂▂▂▂▂▂▂▂▂▃▃▂▂
neuroepithelial cell	1994	4.02	2014	2015	▂▂▂▂▂▂▂▂▂▂▂▂▂▂▂▂▂▂▂▂▃▃▂▂▂▂▂▂▂
cancer	1994	3.89	2011	2012	▂▂▂▂▂▂▂▂▂▂▂▂▂▂▂▂▂▃▃▂▂▂▂▂▂▂▂▂▂
nanoparticle	1994	3.77	2018	2020	▂▂▂▂▂▂▂▂▂▂▂▂▂▂▂▂▂▂▂▂▂▂▂▂▃▃▃▂▂
angiogenesis	1994	3.58	2003	2011	▂▂▂▂▂▂▂▂▂▃▃▃▃▃▃▃▃▃▂▂▂▂▂▂▂▂▂▂▂
aryl hydrocarbon receptor	1994	3.49	2000	2012	▂▂▂▂▂▂▃▃▃▃▃▃▃▃▃▃▃▃▃▂▂▂▂▂▂▂▂▂▂
developmental toxicity	1994	3.48	2017	2022	▂▂▂▂▂▂▂▂▂▂▂▂▂▂▂▂▂▂▂▂▂▂▂▃▃▃▃▃▃
messenger rna expression	1994	3.43	2011	2013	▂▂▂▂▂▂▂▂▂▂▂▂▂▂▂▂▂▃▃▃▂▂▂▂▂▂▂▂▂
zebrafish embryo	1994	3.43	2018	2020	▂▂▂▂▂▂▂▂▂▂▂▂▂▂▂▂▂▂▂▂▂▂▂▂▃▃▃▂▂
zebrafish danio rerio	1994	3.42	2015	2018	▂▂▂▂▂▂▂▂▂▂▂▂▂▂▂▂▂▂▂▂▂▃▃▃▃▂▂▂▂
